# Supplementary material for: Silyl alkynylphosphine-boranes: key precursors of triazolylphosphines via tandem desilylation-Click chemistry
Source: Royal Society of Chemistry journal article supplement (doi:10.1039/c4ob00397g), 2014-01-01
Supplement: c4ob00397g1.pdf [file c4ob00397g1.pdf]

*Supporting Information*

**Silyl alkynylphosphine-boranes: key-precursors of triazolylphosphines via  
tandem desilylation-Click chemistry**

Romain Veillard, Elise Bernoud, Ibrahim Abdellah, Jean-François Lohier, Carole Alayrac,\*  
and Annie-Claude Gaumont\*

*Laboratoire de Chimie Moléculaire et Thioorganique, UMR CNRS 6507, INC3M FR3038*

*ENSICAEN & Université de Caen Basse-Normandie*

*6 bvd Maréchal Juin 14050 CAEN, France*

*Fax : (+33)2 31 45 28 77*

*E-mail : [carole.witulski-alayrac@ensicaen.fr](mailto:carole.witulski-alayrac@ensicaen.fr) ; [annie-claude.gaumont@ensicaen.fr](mailto:annie-claude.gaumont@ensicaen.fr)*

1. General Information
2. Experimental Procedure and Characterization Data
3.  $^1\text{H}$ ,  $^{31}\text{P}$  and  $^{13}\text{C}$  NMR Spectra
4. Chiral HPLC Analysis of **9**

## 1. General Information

Toluene, diethyl ether, dichloromethane and THF were purified by an Innovative Technology Pure Solv. Device (activated alumina column containing a copper catalyst and molecular sieves) and degassed. Alkynylphosphine-boranes **4a-d**<sup>1,2</sup> and benzyl azide **5a**<sup>3</sup> were prepared according to literature procedures. All other reagents were used as supplied.

Chromatographic purifications were conducted using Merck silica gel Si 60 (40-63  $\mu\text{m}$ ) and TLC were performed on silica gel 60-F<sub>254</sub> plates (0.1 mm) with UV or KMnO<sub>4</sub> detection. <sup>1</sup>H, <sup>13</sup>C, <sup>31</sup>P, <sup>11</sup>B <sup>19</sup>F NMR spectra were recorded on a BRUKER AVANCE III 400 or 500 spectrometer. <sup>1</sup>H and <sup>13</sup>C NMR chemical shifts are reported in ppm using the residual peak of chloroform-*d* (7.26 and 77.16 ppm) or dichloromethane-*d*<sub>2</sub> (5.32 and 53.84 ppm) as internal standard. <sup>31</sup>P, <sup>19</sup>F and <sup>11</sup>B NMR chemical shifts are reported relative to respectively H<sub>3</sub>PO<sub>4</sub> (85%), CFC<sub>l</sub><sub>3</sub> and BF<sub>3</sub>.Et<sub>2</sub>O used as external references. Coupling constants *J* are reported in Hertz (Hz). Abbreviations are used as follows: s = singlet, d = doublet, t = triplet, quint = quintuplet, sext = sextuplet, m = multiplet, br = broad. High Resolution Mass Spectrometry (HRMS) was performed on a QTOF Micro WATERS spectrometer. IR spectra were recorded a Perkin Elmer Spectrum One FTIR spectrometer equipped with an ATR device, and only the strongest or structurally most important peaks are listed. Melting points (Mp) were measured with an Electrotherma IA 9200 instrument. Elemental analysis (Anal.) was obtained from a ThermoQuest NA 2500 CHNS-O device.

Optical rotations were recorded on a JASCO P-2000 polarimeter at 589 nm and reported as follows:  $[\alpha]_{\text{D}}^{20}$ , concentration (*c* in g/100 mL), and solvent.

X-Ray diffraction analysis was performed on a Bruker APEXII Kappa CCD diffractometer (MoK $\alpha$   $\lambda=0,71073$  Å; graphite monochromator).

## 2. Experimental procedure and characterization data

**Diethyl-ethynylphosphine-borane (3a):** To a solution of (triisopropylsilyl)ethynyl-diethylphosphine-borane **4a**<sup>1</sup> (2.5 g, 8.8 mmol, 1 equiv.) in THF (30 mL) at 0 °C under N<sub>2</sub> atmosphere were successively added H<sub>2</sub>O (0.75 mL) and TBAF (1M in THF, 18.5 mL, 18.5 mmol, 2.1 equiv.). The reaction mixture was stirred at 25–30 °C for 2.5 h, then hydrolysed and washed with brine. The aqueous layer was extracted with Et<sub>2</sub>O and the combined organic layers were dried over MgSO<sub>4</sub> and concentrated under reduced pressure. The residue was purified by silica gel column chromatography with pentane/Et<sub>2</sub>O (9:1) as eluent to afford **3a** as a colourless oil (1.08 g, 96%).

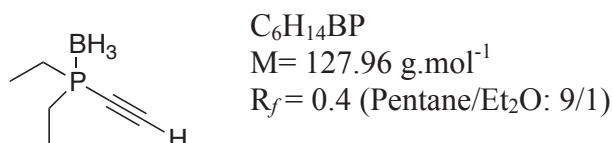

<sup>1</sup>H NMR (400 MHz, CDCl<sub>3</sub>) δ 2.98 (d, *J*<sub>HP</sub> = 7.4 Hz, 1H), 1.81 (m, 4H), 1.25 (dt, *J*<sub>HP</sub> = 17.6 Hz, *J*<sub>HH</sub> = 7.6 Hz, 6 H), 0.95-0.22 (m, 3H). <sup>13</sup>C NMR (100 MHz, CDCl<sub>3</sub>) δ 95.1 (d, *J*<sub>CP</sub> = 10.1 Hz), 75.3 (d, *J*<sub>CP</sub> = 82.8 Hz), 18.4 (d, *J*<sub>CP</sub> = 39.9 Hz), 7.2 (d, *J*<sub>CP</sub> = 3.5 Hz). <sup>31</sup>P NMR (162 MHz, CDCl<sub>3</sub>) δ 11.9 (m). <sup>11</sup>B NMR (160 MHz, CDCl<sub>3</sub>) δ -39.2 (qd, *J*<sub>BH</sub> = 97.6 Hz, *J*<sub>BP</sub> = 54.1 Hz). IR (ATR, cm<sup>-1</sup>) ν 3252, 2977, 2379, 2341, 2060, 1458, 1068, 1036, 1021, 758.

**Di-*t*-butyl-(trimethylsilyl)ethynylphosphine-borane (4b):** To an ice-bath cooled solution of trimethylsilylacetylene (0.77 g, 7.8 mmol, 1.1 equiv.) in Et<sub>2</sub>O (20 mL) under N<sub>2</sub> was added dropwise a solution of *n*-BuLi (1.7 M in hexane, 5.1 mL, 8.7 mmol, 1.2 equiv.). After stirring at 0 °C for 1 h, the reaction medium was cooled to -78 °C and a solution of di-*t*-butylchlorophosphine (1.26 g, 7.0 mmol, 1 equiv.) in Et<sub>2</sub>O (10 mL) was slowly added. The reaction mixture was warmed up to rt and stirred overnight. After cooling to 0 °C, BH<sub>3</sub>•SMe<sub>2</sub> (1 mL, 10.5 mmol, 1.5 equiv.) was added dropwise. After 1 h of stirring at rt, the reaction mixture was hydrolysed at 0 °C with H<sub>2</sub>O (20 mL) and extracted with Et<sub>2</sub>O. The combined organic layers were washed with H<sub>2</sub>O and brine, dried over MgSO<sub>4</sub> and finally concentrated under reduced pressure. The residue was purified by silica gel column chromatography with pentane/Et<sub>2</sub>O (9:1) as the eluent to afford **4b** as a colourless oil (1.34 g, 75% yield).

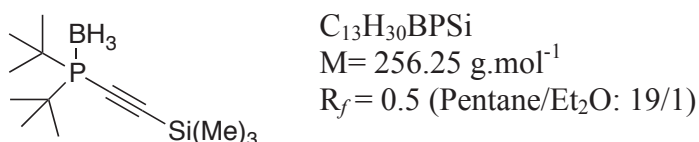

<sup>1</sup>H NMR (400 MHz, CDCl<sub>3</sub>) δ 1.33 (d, *J*<sub>HP</sub> = 14.0 Hz, 18H), 1.05–0.70 (m, 3H), 0.23 (s, 9H). <sup>31</sup>P NMR (162 MHz, CDCl<sub>3</sub>) δ 40.7 (m). <sup>11</sup>B NMR (128 MHz, CDCl<sub>3</sub>) δ -40.3 (m). HRMS (ESI) Calcd for C<sub>13</sub>H<sub>30</sub>BNaPSi [M+Na]<sup>+</sup>: 279.1845. Found: 279.1833.

**(Triisopropylsilyl)ethynyl-methylphenylphosphine-borane (4c):** In a Schlenk tube, flushed with nitrogen, CuI (28 mg, 0.15 mmol, 10 mol%), 1,10-phenanthroline (27 mg, 0.15 mmol, 10 mol%) and degassed dry toluene (5 mL) were introduced. After 20 min of stirring at rt, methylphenylphosphine-borane<sup>4</sup> (200 mg, 1.45 mmol, 1 equiv.), K<sub>3</sub>PO<sub>4</sub> (616 mg, 2.9 mmol, 2 equiv.), 1-bromo-(triisopropylsilyl)ethyne **7** (416 mg, 1.60 mmol, 1.1 equiv.) and degassed dry toluene (15 mL) were successively added. The reaction mixture was flushed with nitrogen prior to thermal heating at 60 °C overnight. After cooling to rt, the reaction mixture was filtered over celite with toluene as the eluent. The filtrate was concentrated under reduced pressure and the residue was purified by silica gel column chromatography with pentane/toluene (3:2) as the eluent to afford **4c** as a colourless oil (251 mg, 54% yield).

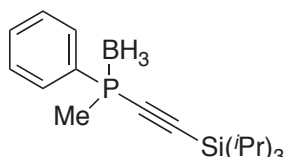

C<sub>18</sub>H<sub>32</sub>BPSi  
M= 318.32 g.mol<sup>-1</sup>  
R<sub>f</sub> = 0.4 (Pentane/Toluene: 3/2)

<sup>1</sup>H NMR (400 MHz, CDCl<sub>3</sub>) δ 7.89–7.83 (m, 2H), 7.53–7.46 (m, 3H), 1.73 (d, J<sub>HP</sub> = 10.4 Hz, 3H), 1.13–1.08 (m, 21H), 1.40–0.50 (m, 3H). <sup>13</sup>C NMR (125 MHz, CDCl<sub>3</sub>) δ 131.6 (d, J<sub>CP</sub> = 2.5 Hz), 131.5 (d, J<sub>CP</sub> = 10.8 Hz), 129.4 (d, J<sub>CP</sub> = 62.1 Hz), 129.1 (d, J<sub>CP</sub> = 11.5 Hz), 115.1 (d, J<sub>CP</sub> = 6.6 Hz), 98.6 (d, J<sub>CP</sub> = 87.3 Hz), 18.6 (s), 16.2 (d, J<sub>CP</sub> = 43.3 Hz), 11.1 (s). <sup>31</sup>P NMR (162 MHz, CDCl<sub>3</sub>) δ -4.1 (m). <sup>11</sup>B NMR (160 MHz, CDCl<sub>3</sub>) δ -36.8 (qd, J<sub>BH</sub> = 96.5 Hz, J<sub>BP</sub> = 54.4 Hz). IR (ATR, cm<sup>-1</sup>) ν 2944, 2866, 2373, 1462, 1057, 896, 882, 800, 677. HRMS (ESI) Calcd for C<sub>18</sub>H<sub>32</sub>BNaPSi [M+Na]<sup>+</sup>: 341.2002. Found: 341.2018.

**(R)-(Triisopropylsilyl)ethynylmethyl-*t*-butylphosphine borane (8):** In a Schlenk tube, flushed with nitrogen, CuI (7.2 mg, 0.04 mmol, 10 mol%), 1,10-phenanthroline (6.8 mg, 0.04 mmol, 10 mol%) and degassed dry toluene (2 mL) were introduced. After 20 min of stirring at rt, (*S*)-*tert*-butylmethylphosphine-borane (**6**)<sup>5</sup> (44 mg, 0.37 mmol), K<sub>2</sub>CO<sub>3</sub> (104 mg, 0.75 mmol, 2 equiv.), 1-bromo-(triisopropylsilyl)ethyne **7** (105 mg, 0.37 mmol, 1 equiv.) and degassed dry toluene (3 mL) were successively added. The reaction mixture was flushed with nitrogen prior to thermal heating at 60 °C overnight. After cooling to rt, the reaction mixture was filtered over celite with CH<sub>2</sub>Cl<sub>2</sub> as the eluent. The filtrate was concentrated under reduced pressure and the residue was purified by silica gel column chromatography with pentane/Et<sub>2</sub>O (9:1) as the eluent to afford **8** as a white solid (80 mg, 72% yield).

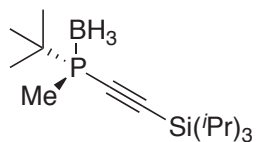

C<sub>16</sub>H<sub>36</sub>BPSi  
M= 298.33 g.mol<sup>-1</sup>  
Mp < 20 °C  
R<sub>f</sub> = 0.5 (Pentane/Et<sub>2</sub>O: 19/1)

<sup>1</sup>H NMR (400 MHz, CDCl<sub>3</sub>) δ 1.43 (d, J<sub>HP</sub> = 10.0 Hz, 3H), 1.24 (d, J<sub>HP</sub> = 15.2 Hz, 9H), 1.10–1.05 (m, 21H), 0.90–0.15 (m, 3H). <sup>13</sup>C NMR (100 MHz, CDCl<sub>3</sub>) δ 113.4 (d, J<sub>CP</sub> = 3.4 Hz), 98.3 (d, J<sub>CP</sub> = 77.6 Hz), 28.7 (d, J<sub>CP</sub> = 37.5 Hz), 24.9 (d, J<sub>CP</sub> = 3.5 Hz), 18.5 (s), 11.0, 8.5 (d, J<sub>CP</sub> = 39.7 Hz). <sup>31</sup>P NMR (162 MHz, CDCl<sub>3</sub>) δ 16.9 (m). <sup>11</sup>B NMR (128 MHz, CDCl<sub>3</sub>) δ -38.9 (m). HRMS (ESI) Calcd for C<sub>16</sub>H<sub>36</sub>BNaSiP [M+Na]<sup>+</sup>: 321.2315. Found: 321.2331.

**Typical procedure for the synthesis of triazolylphosphine-boranes 2: Synthesis of triazolylphosphine-borane 2a (Scheme 4):** TBAF (965 mg, 3.69 mmol, 3 equiv.) was added to a solution of TIPS-ethynyldiethylphosphine-borane (**4a**, 350 mg, 1.23 mmol, 1 equiv.) in *tert*-butanol (2 mL). After 5 min of stirring at rt, benzyl azide (**5a**, 170  $\mu$ L, 1.29 mmol, 1.05 equiv.) and a solution of CuSO<sub>4</sub>•5H<sub>2</sub>O (31 mg, 0.12 mmol, 10 mol%) with L(+)-ascorbic acid sodium salt (48 mg, 0.24 mmol, 20 mol%) in H<sub>2</sub>O (2 mL) were successively added. After 3 h of stirring at rt, the reaction mixture was washed with H<sub>2</sub>O, and the aqueous layer was extracted with EtOAc. The combined organic layers were dried over MgSO<sub>4</sub> and concentrated under reduced pressure. The residue was purified by silica gel column chromatography with a (8:2) pentane/EtOAc mixture as eluent. 1-Benzyl-4-(diethylphosphino-borane)-1*H*-1,2,3-triazole (**2a**) was isolated as a white solid (295 mg, 1.13 mmol) in 92% yield.

#### 1-Benzyl-4-(diethylphosphino-borane)-1*H*-1,2,3-triazole (**2a**)

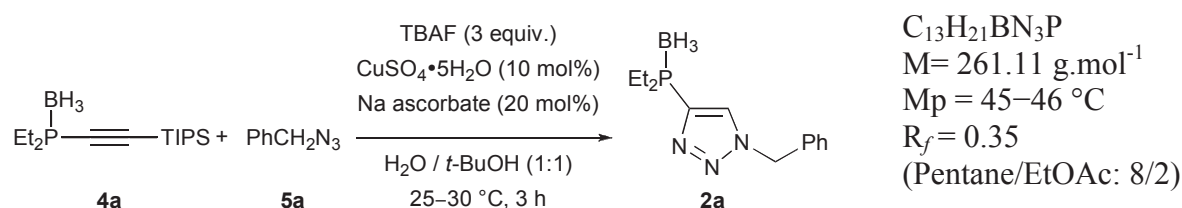

Yield: 99% (1.83 g), obtained from **4a** (2.00 g, 7.04 mmol) according to the typical procedure. <sup>1</sup>H NMR (400 MHz, CDCl<sub>3</sub>)  $\delta$  7.88 (s, 1H), 7.40–7.37 (m, 3H), 7.29–7.26 (m, 2H), 5.56 (s, 2H), 2.10–1.87 (m, 4H), 1.08 (dt,  $J_{\text{HP}} = 17.2$  Hz,  $J_{\text{HH}} = 7.6$  Hz, 6H), 0.96–0.16 (m, 3H). <sup>13</sup>C NMR (100 MHz, CDCl<sub>3</sub>)  $\delta$  137.5 (d,  $J_{\text{CP}} = 70.7$  Hz), 134.0, 131.3 (d,  $J_{\text{CP}} = 27.1$  Hz), 129.4, 129.2, 128.3, 54.4, 17.6 (d,  $J_{\text{CP}} = 38.9$  Hz), 7.0 (d,  $J_{\text{CP}} = 2.2$  Hz). <sup>31</sup>P NMR (162 MHz, CDCl<sub>3</sub>)  $\delta$  7.6 (m). <sup>11</sup>B NMR (160 MHz, CDCl<sub>3</sub>)  $\delta$  -41.9 (qd,  $J_{\text{BH}} = 94.4$  Hz,  $J_{\text{BP}} = 57.4$  Hz). IR (ATR, cm<sup>-1</sup>)  $\nu$  3131, 2966, 2923, 2375, 1453, 1212, 1020, 717. HRMS (ESI) Calcd for C<sub>13</sub>H<sub>21</sub>BN<sub>3</sub>NaP [M+Na]<sup>+</sup>: 284.1464. Found: 284.1467.

#### 4-(Diethylphosphino-borane)-1-phenyl-1*H*-1,2,3-triazole (**2b**)

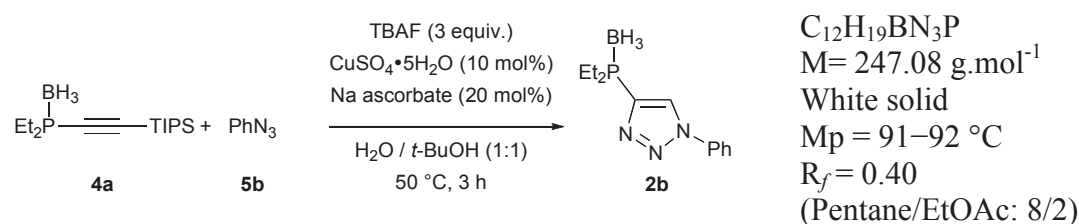

Yield: 65% (21 mg), obtained from **4a** (37 mg, 0.13 mmol) according to the typical procedure. <sup>1</sup>H NMR (400 MHz, CDCl<sub>3</sub>)  $\delta$  8.39 (s, 1H), 7.78–7.75 (m, 2H), 7.57–7.53 (m, 2H), 7.50–7.47 (m, 1H), 2.19–1.94 (m, 4H), 1.15 (dt,  $J_{\text{HP}} = 17.3$  Hz,  $J_{\text{HH}} = 7.6$  Hz, 6H), 1.10–0.22 (m, 3H). <sup>13</sup>C NMR (100 MHz, CDCl<sub>3</sub>)  $\delta$  138.1 (d,  $J_{\text{CP}} = 69.3$  Hz), 136.6, 130.0, 129.6 (d,  $J_{\text{CP}} = 26.9$  Hz), 129.4, 120.8, 17.6 (d,  $J_{\text{CP}} = 38.8$  Hz), 7.1 (d,  $J_{\text{CP}} = 2.2$  Hz). <sup>31</sup>P NMR (162 MHz, CDCl<sub>3</sub>)  $\delta$  8.2 (m). <sup>11</sup>B NMR (160 MHz, CDCl<sub>3</sub>)  $\delta$  -41.9 (qd,  $J_{\text{BH}} = 95.0$  Hz,  $J_{\text{BP}} = 57.1$  Hz). IR (ATR, cm<sup>-1</sup>)  $\nu$  3149, 2976, 2939, 2378, 2359, 1502, 1222, 1033, 750. HRMS (ESI) Calcd for C<sub>12</sub>H<sub>19</sub>BN<sub>3</sub>NaP [M+Na]<sup>+</sup>: 270.1307. Found: 270.1298.

#### 4-(Diethylphosphino-borane)-1-(4-anisyl)-1*H*-1,2,3-triazole (2c)

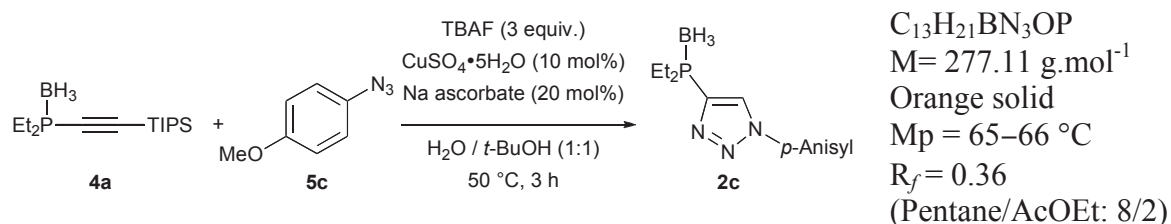

Yield: 55% (242 mg), obtained from **4a** (600 mg, 2.11 mmol) according to the typical procedure. <sup>1</sup>H NMR (400 MHz, CDCl<sub>3</sub>) δ 8.29 (s, 1H), 7.65 (d, *J*<sub>HH</sub> = 8.8 Hz, 2H), 7.03 (d, *J*<sub>HH</sub> = 8.8 Hz, 2H), 3.87 (s, 3H), 2.17–1.93 (m, 4H), 1.14 (dt, *J*<sub>HP</sub> = 17.3 Hz, *J*<sub>HH</sub> = 7.6 Hz, 6H), 0.95–0.24 (m, 3H). <sup>13</sup>C NMR (100 MHz, CDCl<sub>3</sub>) δ 160.3, 137.8 (d, *J*<sub>CP</sub> = 70.4 Hz), 130.0, 129.7 (d, *J*<sub>CP</sub> = 27.2 Hz), 122.5, 115.0, 55.8, 17.7 (d, *J*<sub>CP</sub> = 39.2 Hz), 7.1 (d, *J*<sub>CP</sub> = 2.0 Hz). <sup>31</sup>P NMR (162 MHz, CDCl<sub>3</sub>) δ 7.9 (m). <sup>11</sup>B NMR (160 MHz, CDCl<sub>3</sub>) δ -41.8 (qd, *J*<sub>BH</sub> = 95.0 Hz, *J*<sub>BP</sub> = 56.8 Hz). IR (ATR, cm<sup>-1</sup>) ν 2971, 2380, 2348, 2331, 1518, 1440, 1247, 1034, 847, 818, 763. HRMS (ESI) Calcd for C<sub>13</sub>H<sub>21</sub>BN<sub>3</sub>ONaP [M+Na]<sup>+</sup>: 300.1413. Found: 300.1408.

Recrystallisation at -20 °C from CH<sub>2</sub>Cl<sub>2</sub>/pentane gave orange single crystals.

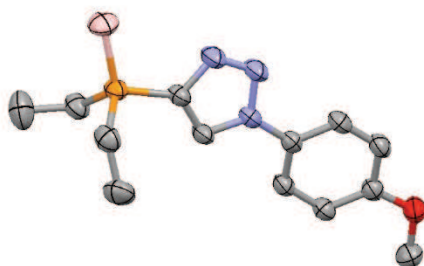

**Crystallographic data:** Bruker Kappa APEXII CCD diffractometer (MoK<sub>α</sub> λ = 0.71073 Å; graphite monochromator; *T* = 291(2) K. Formula C<sub>13</sub>H<sub>21</sub>BN<sub>3</sub>OP, formula weight 277.11, crystal system monoclinic, space group *P2*(1)/*c*, crystal dimensions 0.40 x 0.32 x 0.10 mm<sup>3</sup>, *a* = 15.8190(3), *b* = 7.2629(1), *c* = 13.1199(2) Å, α = γ = 90.00, β = 94.554(1)°, *V* = 1502.61(4) Å<sup>3</sup>, *Z* = 4, ρ<sub>calcd</sub> = 1.225 Mg m<sup>-3</sup>, μ = 0.178 mm<sup>-1</sup>, 2θ<sub>max</sub> = 60.06°, 28283 measured reflections, 4391 independent reflections (*R*<sub>int</sub> = 0.0268), *R*<sub>1</sub> [*I* > 2σ(*I*)] = 0.0434, *wR*<sub>2</sub> [*I* > 2σ(*I*)] = 0.1236, GOF = 1.047, 234 parameters, final difference map within 0.295 and -0.260 eÅ<sup>-3</sup>. The structure was solved using direct methods and refined by full-matrix least-squares analysis on *F*<sup>2</sup>. CCDC 986147 contains the supplementary crystallographic data for this paper. These data can be obtained free of charge from The Cambridge Crystallographic Data Center via [www.ccdc.cam.ac.uk/data\\_request/cif](http://www.ccdc.cam.ac.uk/data_request/cif). Selected bond lengths (Å) and angles (deg): P1-C1 1.7963(14), P1-C12 1.8116(17), P1-C10 1.8191(18), P1-B1 1.9159(19), C1-N3 1.3607(17), N1-C2 1.3470(17), N1-N2 1.3483(16), N1-C3 1.4287(18), N3-N2 1.3049(19), C1-P1-C12 103.76(7), C1-P1-C10 107.07(7), C12-P1-C10 107.22(9), C1-P1-B1 112.21(8), C12-P1-B1 114.98(10), C10-P1-B1 111.04(10).

## 1-(4-Bromophenyl)-4-(diethylphosphino-borane)-1*H*-1,2,3-triazole (2d)

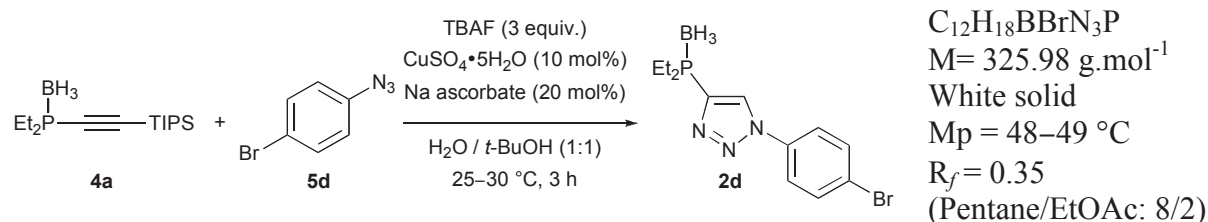

Yield: 95% (40 mg), obtained from **4a** (37 mg, 0.13 mmol) according to the typical procedure. <sup>1</sup>H NMR (400 MHz, CDCl<sub>3</sub>) δ 8.37 (s, 1H), 7.68–7.66 (m, 4H), 2.19–1.92 (m, 4H), 1.14 (dt,  $J_{\text{HP}} = 17.3$  Hz,  $J_{\text{HH}} = 7.6$  Hz, 6H), 0.90–0.20 (m, 3H). <sup>13</sup>C NMR (100 MHz, CDCl<sub>3</sub>) δ 138.5 (d,  $J_{\text{CP}} = 69.0$  Hz), 135.5, 133.2, 129.5 (d,  $J_{\text{CP}} = 27.1$  Hz), 123.2, 122.2, 17.6 (d,  $J_{\text{CP}} = 38.8$  Hz), 7.1 (d,  $J_{\text{CP}} = 2.3$  Hz). <sup>31</sup>P NMR (162 MHz, CDCl<sub>3</sub>) δ 8.4 (m). <sup>11</sup>B NMR (160 MHz, CDCl<sub>3</sub>) δ -41.9 (qd,  $J_{\text{BH}} = 93.8$  Hz,  $J_{\text{BP}} = 55.0$  Hz). IR (ATR, cm<sup>-1</sup>) ν 2922, 2854, 2351, 1497, 1455, 1225, 1033, 1010, 982, 822, 742. HRMS (ESI) Calcd for C<sub>12</sub>H<sub>18</sub>BBrN<sub>3</sub>NaP [M+Na]<sup>+</sup>: 348.0412. Found: 348.0406.

Recrystallisation at -20 °C from CH<sub>2</sub>Cl<sub>2</sub>/pentane gave colorless single crystals.

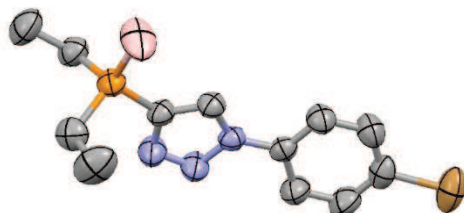

**Crystallographic data:** Bruker Kappa APEXII CCD diffractometer (MoK<sub>α</sub> λ = 0.71073 Å; graphite monochromator; T = 291(2) K. Formula C<sub>12</sub>H<sub>18</sub>BBrN<sub>3</sub>P, formula weight 325.98, crystal system triclinic, space group *P*-1, crystal dimensions 0.29 x 0.24 x 0.22 mm<sup>3</sup>, *a* = 7.6993(2), *b* = 10.2355(3), *c* = 11.5727(5) Å, α = 105.331(2), β = 104.973(2), γ = 107.292(2)°, *V* = 781.55(5) Å<sup>3</sup>, *Z* = 2, ρ<sub>calcd</sub> = 1.385 Mg m<sup>-3</sup>, μ = 2.719 mm<sup>-1</sup>, 2θ<sub>max</sub> = 53.46 °, 9184 measured reflections, 2422 independent reflections (*R*<sub>int</sub> = 0.0280), *R*<sub>1</sub> [*I* > 2σ(*I*)] = 0.0429, *wR*<sub>2</sub> [*I* > 2σ(*I*)] = 0.1126, GOF = 1.008, 166 parameters, final difference map within 0.551 and -0.688 eÅ<sup>-3</sup>. The structure was solved using direct methods and refined by full-matrix least-squares analysis on *F*<sup>2</sup>. CCDC 986148 contains the supplementary crystallographic data for this paper. These data can be obtained free of charge from The Cambridge Crystallographic Data Center via [www.ccdc.cam.ac.uk/data\\_request/cif](http://www.ccdc.cam.ac.uk/data_request/cif). Selected bond lengths (Å) and angles (deg): Br1-C6 1.891(3), P1-C2 1.794(3), P1-C9 1.815(4), P1-C11 1.810(4), P1-B1 1.904(4), N3-C2 1.363(4), N3-N2 1.293(4), N2-N1 1.354(3), N1-C1 1.349(3), C1-C2 1.349(4), C3-N1 1.422(4), C2-P1-C9 104.82(14), C2-P1-C11 104.84(16), C9-P1-C11 104.40(17), C2-P1-B1 110.7(2), C9-P1-B1 115.3(3), C11-P1-B1 115.7(3).

#### 4-(Diethylphosphino-borane)-1-(4-trifluoromethylphenyl)-1*H*-1,2,3-triazole (**2e**)

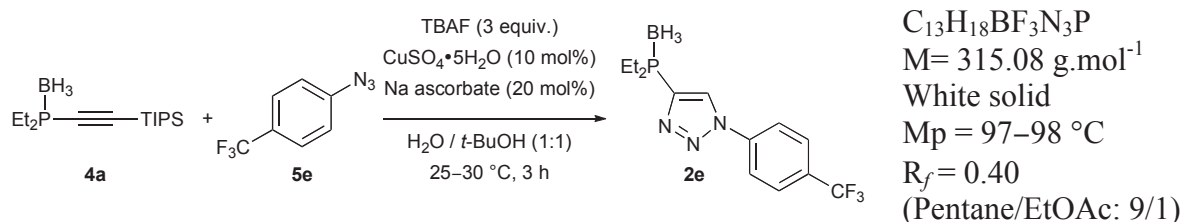

Yield: 98% (483 mg) obtained from **4a** (446 mg, 1.57 mmol) according to the typical procedure.  $^1\text{H}$  NMR (400 MHz,  $\text{CDCl}_3$ )  $\delta$  8.46 (s, 1H), 7.94 (d,  $J_{\text{HH}} = 8.4$  Hz, 2H), 7.83 (d,  $J_{\text{HH}} = 8.4$  Hz, 2H), 2.18–1.95 (m, 4H), 1.14 (dt,  $J_{\text{HP}} = 17.6$  Hz,  $J_{\text{HH}} = 7.6$  Hz, 6H), 1.10–0.33 (m, 3H).  $^{13}\text{C}$  NMR (100 MHz,  $\text{CDCl}_3$ )  $\delta$  138.8 (d,  $J_{\text{CP}} = 68$  Hz), 138.8, 131.3 (q,  $J_{\text{CF}} = 33$  Hz), 129.5 (d,  $J_{\text{CP}} = 27$  Hz), 127.3 (q,  $J_{\text{CF}} = 4$  Hz), 123.5 (q,  $J_{\text{CF}} = 270$  Hz), 120.8, 17.5 (d,  $J_{\text{CP}} = 39$  Hz), 7.0 (d,  $J_{\text{CP}} = 2.1$  Hz).  $^{31}\text{P}$  NMR (162 MHz,  $\text{CDCl}_3$ )  $\delta$  8.7 (m).  $^{19}\text{F}$  NMR (376 MHz,  $\text{CDCl}_3$ )  $\delta$  -62.7.  $^{11}\text{B}$  NMR (128 MHz,  $\text{CDCl}_3$ )  $\delta$  -41.9 (qd,  $J_{\text{BH}} = 94.7$  Hz,  $J_{\text{BP}} = 59.4$  Hz). IR (ATR,  $\text{cm}^{-1}$ )  $\nu$  3128, 2983, 2381, 1618, 1525, 1499, 1441, 1406, 1325, 1227, 1158, 1121, 1070, 1018, 981, 843, 760. HRMS (ESI) Calcd for  $\text{C}_{13}\text{H}_{18}\text{BN}_3\text{F}_3\text{NaP}$  [ $M+\text{Na}$ ] $^+$ : 338.1181. Found: 338.1180.

#### 1-Benzyl-4-(di-*tert*-butylphosphino-borane)-1*H*-1,2,3-triazole (**2f**)

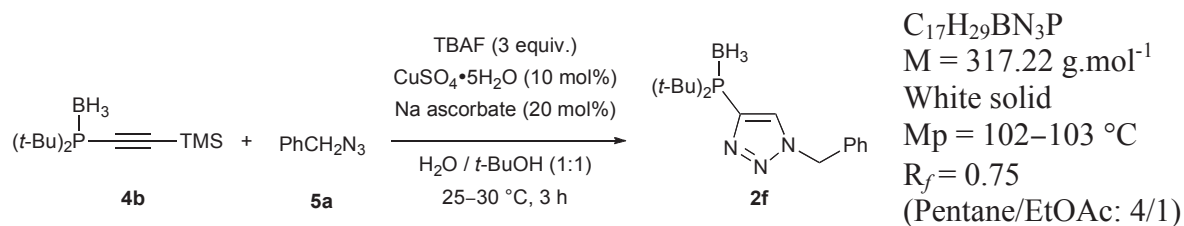

Yield: 76% (690 mg), obtained from **4b** (730 mg, 2.85 mmol) according to the typical procedure.  $^1\text{H}$  NMR (400 MHz,  $\text{CDCl}_3$ )  $\delta$  7.99 (s, 1H), 7.39–7.35 (m, 3H), 7.27–7.22 (m, 2H), 5.57 (s, 2H), 1.31 (d,  $J_{\text{HP}} = 13.6$  Hz, 18H), 0.95–0.15 (m, 3H).  $^{13}\text{C}$  NMR (100 MHz,  $\text{CDCl}_3$ )  $\delta$  137.4 (d,  $J_{\text{CP}} = 64.4$  Hz), 134.2, 133.0 (d,  $J_{\text{CP}} = 24.0$  Hz), 129.3, 128.9, 127.9, 54.1, 33.0 (d,  $J_{\text{CP}} = 29.2$  Hz), 28.3 (d,  $J_{\text{CP}} = 2.0$  Hz).  $^{31}\text{P}$  NMR (162 MHz,  $\text{CDCl}_3$ )  $\delta$  31.6 (m).  $^{11}\text{B}$  NMR (128 MHz,  $\text{CDCl}_3$ )  $\delta$  -41.6 (m). IR (ATR,  $\text{cm}^{-1}$ )  $\nu$  3133, 2965, 2385, 1497, 1475, 1457, 1393, 1368, 1211, 1076, 1045, 814, 719. HRMS (ESI) Calcd for  $\text{C}_{17}\text{H}_{29}\text{BN}_3\text{NaP}$  [ $M+\text{Na}$ ] $^+$ : 340.2090. Found: 340.2083.

#### 1-Benzyl-4-(methylphenylphosphino-borane)-1*H*-1,2,3-triazole (**2g**)

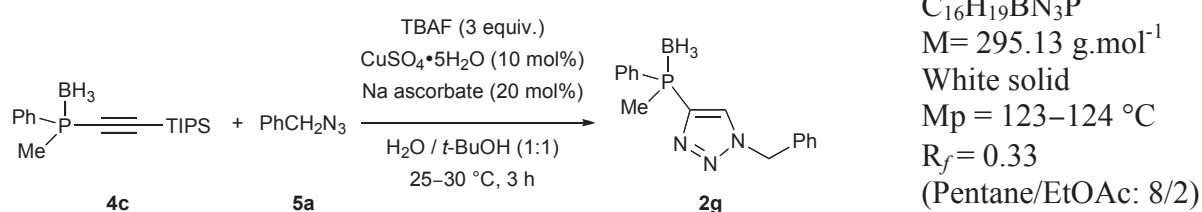

Yield: 88% (42 mg), obtained from **4c** (52 mg, 0.16 mmol) according to the typical procedure with 1.2 equiv. of benzyl azide (**5a**).  $^1\text{H}$  NMR (400 MHz,  $\text{CDCl}_3$ )  $\delta$  7.84 (s, 1H), 7.84–7.77 (m, 2H), 7.36–7.16 (m, 8H), 5.45 and 5.43 (AB,  $J_{\text{HH}} = 15.0$  Hz, 2H), 1.84 (d,  $J_{\text{HP}} = 10.8$  Hz,



3H), 1.40–0.40 (m, 3H).  $^{13}\text{C}$  NMR (100 MHz,  $\text{CDCl}_3$ )  $\delta$  139.1 (d,  $J_{\text{CP}} = 77.9$  Hz), 133.8, 132.1 (d,  $J_{\text{CP}} = 10.2$  Hz), 131.6 (d,  $J_{\text{CP}} = 2.5$  Hz), 130.2 (d,  $J_{\text{CP}} = 30.0$  Hz), 129.3 (d,  $J_{\text{CP}} = 59.1$  Hz), 129.3, 129.1, 128.8 (d,  $J_{\text{CP}} = 10.1$  Hz), 128.4, 54.4, 12.3 (d,  $J_{\text{CP}} = 43.0$  Hz).  $^{31}\text{P}$  NMR (162 MHz,  $\text{CDCl}_3$ )  $\delta$  -6.1 (m).  $^{11}\text{B}$  NMR (160 MHz,  $\text{CDCl}_3$ )  $\delta$  -39.3 (qd,  $J_{\text{BH}} = 90.9$  Hz,  $J_{\text{BP}} = 53.4$  Hz). IR (ATR,  $\text{cm}^{-1}$ )  $\nu$  3127, 2922, 2380, 1496, 1438, 1116, 1060, 887, 732, 690. HRMS (ESI) Calcd for  $\text{C}_{16}\text{H}_{19}\text{BN}_3\text{NaP}$   $[\text{M}+\text{Na}]^+$ : 318.1307. Found: 318.1301.

### 1-(4-Bromophenyl)-4-(methylphenylphosphino-borane)-1H-1,2,3-triazole (2h)

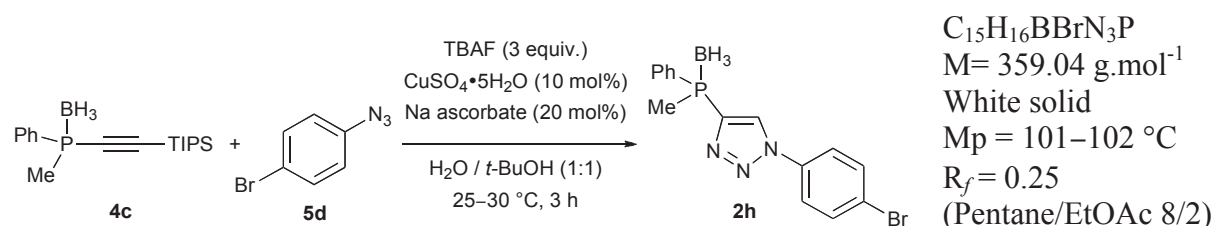

Yield: 76% (36 mg), obtained from **4c** (41 mg, 0.13 mmol) according to the typical procedure.  $^1\text{H}$  NMR (400 MHz,  $\text{CDCl}_3$ )  $\delta$  8.38 (s, 1H), 7.98–7.92 (m, 2H), 7.68–7.62 (m, 4H), 7.51–7.44 (m, 3H), 2.00 (d,  $J_{\text{HP}} = 10.6$  Hz, 3H), 1.30–0.30 (m, 3H).  $^{13}\text{C}$  NMR (100 MHz,  $\text{CDCl}_3$ )  $\delta$  140.3 (d,  $J_{\text{CP}} = 75.8$  Hz), 135.5, 133.2, 132.2 (d,  $J_{\text{CP}} = 10.2$  Hz), 131.8 (d,  $J_{\text{CP}} = 2.5$  Hz), 129.0 (d,  $J_{\text{CP}} = 10.5$  Hz), 129.0 (d,  $J_{\text{CP}} = 74.6$  Hz), 128.4 (d,  $J_{\text{CP}} = 29.9$  Hz), 123.3, 122.3, 12.2 (d,  $J_{\text{CP}} = 42.8$  Hz).  $^{31}\text{P}$  NMR (162 MHz,  $\text{CDCl}_3$ )  $\delta$  -5.6 (m).  $^{11}\text{B}$  NMR (160 MHz,  $\text{CDCl}_3$ )  $\delta$  -39.3 (qd,  $J_{\text{BH}} = 102.2$  Hz,  $J_{\text{BP}} = 49.0$  Hz). IR (ATR,  $\text{cm}^{-1}$ )  $\nu$  3127, 2374, 1500, 1225, 1072, 1037, 895, 823, 744. HRMS (ESI) Calcd for  $\text{C}_{15}\text{H}_{14}\text{BrN}_3\text{P}$   $[(\text{M}-\text{BH}_3)+\text{H}]^+$ : 346.0109. Found: 346.0113.

### 1-Benzyl-4-(diphenylphosphino-borane)-1H-1,2,3-triazole (2i)

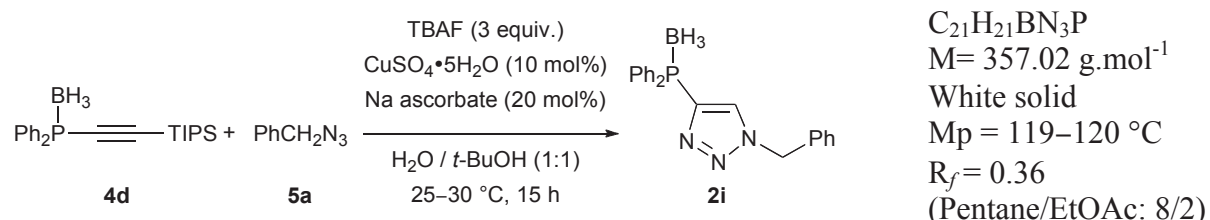

Yield: 60% (337 mg), obtained from **4d** (604 mg, 1.58 mmol) according to the typical procedure.  $^1\text{H}$  NMR (400 MHz,  $\text{CDCl}_3$ )  $\delta$  8.09 (s, 1H), 7.87–7.81 (m, 4H), 7.46–7.37 (m, 9H), 7.32–7.29 (m, 2H), 5.57 (s, 2H), 1.70–0.70 (m, 3H).  $^{13}\text{C}$  NMR (100 MHz,  $\text{CDCl}_3$ )  $\delta$  138.2 (d,  $J_{\text{CP}} = 80.1$  Hz), 133.8, 133.1 (d,  $J_{\text{CP}} = 10.2$  Hz), 131.7 (d,  $J_{\text{CP}} = 26.5$  Hz), 131.5 (d,  $J_{\text{CP}} = 2.5$  Hz), 129.4, 129.2, 128.8 (d,  $J_{\text{CP}} = 9.0$  Hz), 128.7 (d,  $J_{\text{CP}} = 62.3$  Hz), 128.5, 54.5.  $^{31}\text{P}$  NMR (162 MHz,  $\text{CDCl}_3$ )  $\delta$  0.1 (m).  $^{11}\text{B}$  NMR (160 MHz,  $\text{CDCl}_3$ )  $\delta$  -39.0 (m). IR (ATR,  $\text{cm}^{-1}$ )  $\nu$  3150, 2926, 2395, 1495, 1457, 1436, 1107, 1052, 1061, 731, 692. HRMS (ESI) Calcd for  $\text{C}_{21}\text{H}_{21}\text{BN}_3\text{NaP}$   $[\text{M}+\text{Na}]^+$ : 380.1464. Found: 380.1465.

## 1-(4-Bromophenyl)-4-(diphenylphosphino-borane)-1*H*-1,2,3-triazole (2j)

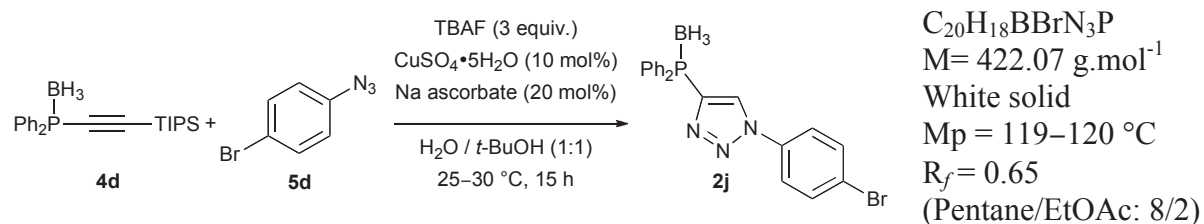

Yield: 55% (61 mg), obtained from **4d** (100 mg, 0.26 mmol) according to the typical procedure. <sup>1</sup>H NMR (400 MHz, CDCl<sub>3</sub>) δ 8.56 (s, 1H), 7.91–7.86 (m, 4H), 7.70–7.64 (m, 4H), 7.52–7.43 (m, 6H), 1.70–0.80 (m, 3H). <sup>13</sup>C NMR (100 MHz, CDCl<sub>3</sub>) δ 139.3 (d, J<sub>CP</sub> = 78.0 Hz), 135.4, 133.1, 133.0 (d, J<sub>CP</sub> = 10.6 Hz), 131.6 (d, J<sub>CP</sub> = 2.5 Hz), 129.6 (d, J<sub>CP</sub> = 30.5 Hz), 128.9 (d, J<sub>CP</sub> = 10.8 Hz), 128.2 (d, J<sub>CP</sub> = 62.2 Hz), 123.2, 122.2. <sup>31</sup>P NMR (162 MHz, CDCl<sub>3</sub>) δ 0.6 (m). <sup>11</sup>B NMR (128 MHz, CDCl<sub>3</sub>) δ -41.9 (qd, J<sub>BH</sub> = 94.7 Hz, J<sub>BP</sub> = 59.4 Hz). IR (ATR, cm<sup>-1</sup>) ν 3143, 3059, 2389, 2338, 1501, 1437, 1225, 1107, 1059, 1035, 983, 738, 692. HRMS (ESI) Calcd for C<sub>20</sub>H<sub>18</sub>BBrN<sub>3</sub>NaP [M+Na]<sup>+</sup>: 444.0412. Found: 444.0424.

Recrystallisation at rt from CH<sub>2</sub>Cl<sub>2</sub>/pentane gave colorless single crystals.

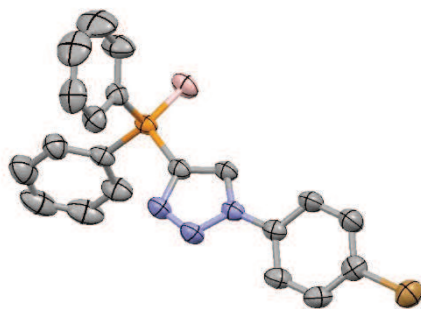

**Crystallographic data:** Bruker Kappa APEXII CCD diffractometer (MoK<sub>α</sub> λ = 0.71073 Å; graphite monochromator; T = 291(2) K. Formula C<sub>20</sub>H<sub>18</sub>BBrN<sub>3</sub>P, formula weight 422.06, crystal system monoclinic, space group C2/c, crystal dimensions 0.42 x 0.41 x 0.35 mm<sup>3</sup>, a = 11.4175(3), b = 15.1163(4), c = 23.4211(7) Å, α = γ = 90.00°, β = 98.935(2), V = 3993.20(19) Å<sup>3</sup>, Z = 8, ρ<sub>calcd</sub> = 1.404 Mg m<sup>-3</sup>, μ = 2.147 mm<sup>-1</sup>, 2θ<sub>max</sub> = 56.68°, 13208 measured reflections, 5129 independent reflections (R<sub>int</sub> = 0.0186), R1 [I > 2σ(I)] = 0.0385, wR2 [I > 2σ(I)] = 0.0936, GOF = 1.023, 236 parameters, final difference map within 0.700 and -0.663 eÅ<sup>-3</sup>. The structure was solved using direct methods and refined by full-matrix least-squares analysis on F<sup>2</sup>. CCDC 986149 contains the supplementary crystallographic data for this paper. These data can be obtained free of charge from The Cambridge Crystallographic Data Center via [www.ccdc.cam.ac.uk/data\\_request/cif](http://www.ccdc.cam.ac.uk/data_request/cif). Selected bond lengths (Å) and angles (deg): Br1-C1 1.895(2), P1-C6 1.795(2), P1-C7 1.808(2), P1-C11 1.807(2), P1-B1 1.911(2), N1-C5 1.350(3), C5-C6 1.362(3), C6-N2 1.368(3), N2-N3 1.302(3), N3-N1 1.356(2), C4-N1 1.422(4), C6-P1-C11 104.19(9), C6-P1-C7 104.61(10), C11-P1-C7 107.45(10).

### 1-(4-Trifluoromethylphenyl)-4-(diphenylphosphino-borane)-1*H*-1,2,3-triazole (**2k**)

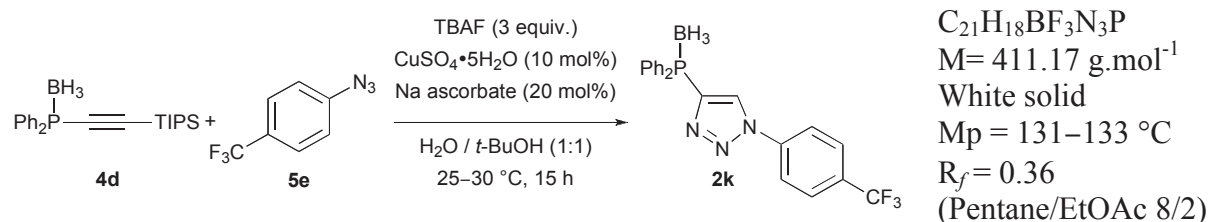

Yield: 53% (218 mg), obtained from **4d** (380 mg, 1 mmol) according to the typical procedure.  $^1\text{H}$  NMR (400 MHz,  $\text{CDCl}_3$ )  $\delta$  8.67 (s, 1H), 7.92–7.81 (m, 8H), 7.53–7.44 (m, 6H), 1.85–0.84 (m, 3H).  $^{13}\text{C}$  NMR (125 MHz,  $\text{CDCl}_3$ )  $\delta$  139.8 (d,  $J_{\text{CP}} = 78.0$  Hz), 138.9, 133.2 (d,  $J_{\text{CP}} = 10.4$  Hz), 131.8 (d,  $J_{\text{CP}} = 2.5$  Hz), 131.5 (q,  $J_{\text{CF}} = 33.3$  Hz), 129.8 (d,  $J_{\text{CP}} = 30.5$  Hz), 129.0 (d,  $J_{\text{CP}} = 11.0$  Hz), 128.1 (d,  $J_{\text{CP}} = 62.7$  Hz), 127.4 (q,  $J_{\text{CF}} = 3.7$  Hz), 123.5 (q,  $J_{\text{CF}} = 272.4$  Hz), 120.9.  $^{31}\text{P}$  NMR (162 MHz,  $\text{CDCl}_3$ )  $\delta$  0.7 (m).  $^{19}\text{F}$  NMR (376 MHz,  $\text{CDCl}_3$ )  $\delta$  –62.7.  $^{11}\text{B}$  NMR (160 MHz,  $\text{CDCl}_3$ )  $\delta$  –39.5 (m). IR (ATR,  $\text{cm}^{-1}$ )  $\nu$  3133, 3059, 2378, 1618, 1524, 1437, 1322, 1223, 1162, 1126, 1107, 1067, 842, 735. HRMS (ESI) Calcd for  $\text{C}_{21}\text{H}_{18}\text{BF}_3\text{N}_3\text{NaP}$  [ $M+\text{Na}$ ] $^+$ : 434.1181. Found: 434.1165. Anal. Calcd for  $\text{C}_{21}\text{H}_{18}\text{BF}_3\text{N}_3\text{P}$ : C, 61.34; H, 4.41; N, 10.22. Found: C, 61.11; H, 4.61; N, 10.12.

### 4-(Diethylphosphino-borane)-1-(phenylthiomethyl)-1*H*-1,2,3-triazole (**2l**)

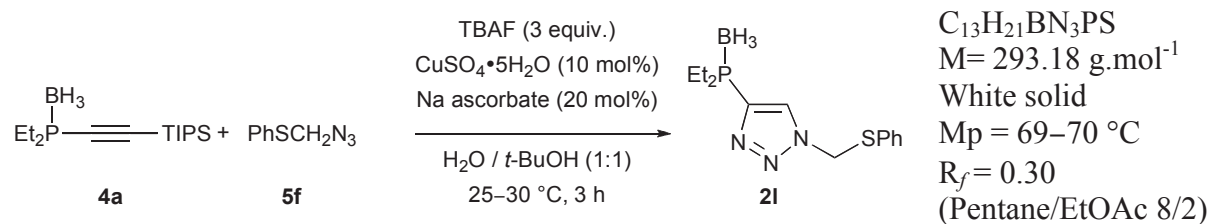

Yield: 76% (29 mg), obtained from **4a** (37 mg, 0.13 mmol) according to the typical procedure.  $^1\text{H}$  NMR (400 MHz,  $\text{CDCl}_3$ )  $\delta$  7.86 (s, 1H), 7.35–7.31 (m, 5H), 5.64 (s, 2H), 2.10–1.85 (m, 4H), 1.06 (dt,  $J_{\text{HP}} = 17.4$  Hz,  $J_{\text{HH}} = 7.7$  Hz, 6H), 0.83–0.06 (m, 3H).  $^{13}\text{C}$  NMR (100 MHz,  $\text{CDCl}_3$ )  $\delta$  137.5 (d,  $J_{\text{CP}} = 69.8$  Hz), 133.2, 131.4 (d,  $J_{\text{CP}} = 27.0$  Hz), 131.2, 129.7, 129.4, 54.4, 17.6 (d,  $J_{\text{CP}} = 38.8$  Hz), 6.98 (d,  $J_{\text{CP}} = 2.2$  Hz).  $^{31}\text{P}$  NMR (162 MHz,  $\text{CDCl}_3$ )  $\delta$  8.1 (m).  $^{11}\text{B}$  NMR (160 MHz,  $\text{CDCl}_3$ )  $\delta$  –42.0 (qd,  $J_{\text{BH}} = 94.1$  Hz,  $J_{\text{BP}} = 56.8$  Hz). IR (ATR,  $\text{cm}^{-1}$ )  $\nu$  3130, 2973, 2937, 2386, 2363, 1439, 1210, 1070, 1039, 747, 690. HRMS (ESI) Calcd for  $\text{C}_{13}\text{H}_{21}\text{BN}_3\text{NaPS}$  [ $M+\text{Na}$ ] $^+$ : 316.1185. Found: 316.1174.

## 4-(Diethylphosphino-borane)-1-(2,3,4-tri-O-acetyl-β-D-xylopyranosyl)-1*H*-1,2,3-triazole (2m)

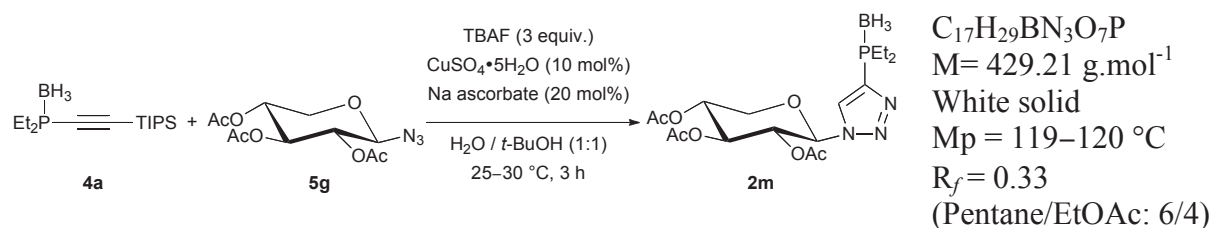

Yield: 75% (96 mg), obtained from **4a** (85 mg, 0.30 mmol) according to the typical procedure. <sup>1</sup>H NMR (400 MHz, CDCl<sub>3</sub>) δ 8.19 (s, 1H), 5.80 (d, *J*<sub>HH</sub> = 8.8 Hz, 1H), 5.44 (dd, *J*<sub>HH</sub> = 9.4 Hz, *J*<sub>HH</sub> = 9.3 Hz, 1H), 5.35 (dd, *J*<sub>HH</sub> = 9.4 Hz, *J*<sub>HH</sub> = 8.9 Hz, 1H), 5.16 (ddd, *J*<sub>HH</sub> = 10.3 Hz, *J*<sub>HH</sub> = 9.3 Hz, *J*<sub>HH</sub> = 5.6 Hz, 1H), 4.34 (dd, *J*<sub>HH</sub> = 11.6 Hz, *J*<sub>HH</sub> = 5.6 Hz, 1H), 3.61 (dd, *J*<sub>HH</sub> = 11.6 Hz, *J*<sub>HH</sub> = 10.3 Hz, 1H), 2.15–1.84 (m, 4H), 2.07 (s, 3H), 2.04 (s, 3H), 1.86 (s, 3H), 1.08 (dt, *J*<sub>HP</sub> = 17.2 Hz, *J*<sub>HH</sub> = 7.6 Hz, 3H), 1.04 (dt, *J*<sub>HP</sub> = 17.2 Hz, *J*<sub>HH</sub> = 7.6 Hz, 3H), 1.10–0.20 (m, 3H). <sup>13</sup>C NMR (100 MHz, CDCl<sub>3</sub>) δ 169.9, 169.7, 168.6, 138.0 (d, *J*<sub>CP</sub> = 68.4 Hz), 130.4 (d, *J*<sub>CP</sub> = 26.7 Hz), 86.5, 71.7, 70.8, 68.3, 65.7, 20.7, 20.6, 20.1, 17.8 (d, *J*<sub>CP</sub> = 38.5 Hz), 17.3 (d, *J*<sub>CP</sub> = 38.8 Hz), 6.9 (d, *J*<sub>CP</sub> = 1.9 Hz), 6.7 (d, *J*<sub>CP</sub> = 2.3 Hz). <sup>31</sup>P NMR (162 MHz, CDCl<sub>3</sub>) δ 9.0 (m). <sup>11</sup>B NMR (160 MHz, CDCl<sub>3</sub>) δ -42.3 (m). IR (ATR, cm<sup>-1</sup>) ν 3162, 2979, 2945, 2381, 1761, 1742, 1376, 1246, 1208, 1034. HRMS (ESI) Calcd for C<sub>17</sub>H<sub>29</sub>BN<sub>3</sub>O<sub>7</sub>NaP [M+Na]<sup>+</sup>: 452.1734. Found: 452.1720.

#### 4-(Diethylphosphino-borane)-1-([2.2]-paracyclophan-4-yl)-1*H*-1,2,3-triazole (2n)

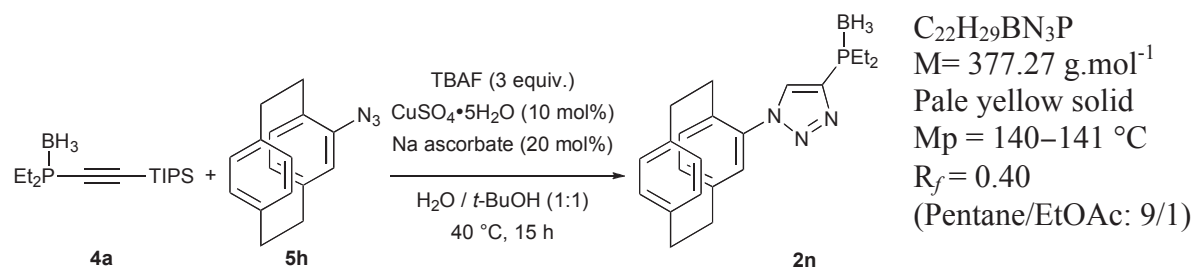

Yield: 77% (287 mg) obtained from **4a** (284 mg, 1.00 mmol), according to the typical procedure.  $^1\text{H}$  NMR (400 MHz,  $\text{CDCl}_3$ )  $\delta$  8.16 (s, 1H), 6.75–6.50 (m, 7H), 3.30–2.86 (m, 7H), 2.65–2.53 (m, 1H), 2.27–1.95 (m, 4H), 1.27–1.12 (m, 6H), 1.05–0.17 (m, 3H).  $^{13}\text{C}$  NMR (100 MHz,  $\text{CDCl}_3$ )  $\delta$  142.1, 139.4, 139.0, 137.0 (d,  $J_{\text{CP}} = 70.1$  Hz), 136.8, 135.8, 134.5, 133.1, 133.0, 132.8, 132.6, 132.3 (d,  $J_{\text{CP}} = 27$  Hz), 130.5, 127.4, 35.3, 34.9, 34.7, 32.8, 17.8 (d,  $J_{\text{CP}} = 8.6$  Hz), 17.4 (d,  $J_{\text{CP}} = 8.6$  Hz), 7.10 (d,  $J_{\text{CP}} = 2.3$  Hz), 7.06 (d,  $J_{\text{CP}} = 2.3$  Hz).  $^{31}\text{P}$  NMR (162 MHz,  $\text{CDCl}_3$ )  $\delta$  7.9 (m).  $^{11}\text{B}$  NMR (128 MHz,  $\text{CDCl}_3$ )  $\delta$  -41.8 (m). IR (ATR,  $\text{cm}^{-1}$ )  $\nu$  3130, 2970, 2935, 2383, 2365, 1455, 1501, 1225, 1034, 777, 721. HRMS (ESI) Calcd for  $\text{C}_{22}\text{H}_{29}\text{BN}_3\text{NaP}$   $[\text{M}+\text{Na}]^+$ : 400.2090. Found: 400.2071.

Recrystallisation at rt by slow diffusion of pentane into a  $\text{CHCl}_3$  solution gave colourless single crystals.

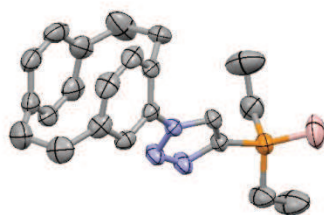

**Crystallographic data:** Bruker Kappa APEXII CCD diffractometer ( $\text{MoK}\alpha$   $\lambda = 0.71073$  Å; graphite monochromator;  $T = 291(2)$  K. Formula  $\text{C}_{22}\text{H}_{29}\text{BN}_3\text{P}$ , formula weight 377.26, crystal system orthorhombic, space group  $Pca2(1)$ , crystal dimensions  $0.47 \times 0.45 \times 0.31 \text{ mm}^3$ ,  $a = 11.0128(2)$ ,  $b = 7.8943(2)$ ,  $c = 24.9976(5)$  Å,  $\alpha = \gamma = \beta = 90.00^\circ$ ,  $V = 2173.25(8)$  Å<sup>3</sup>,  $Z = 4$ ,  $\rho_{\text{calcd}} = 1.153 \text{ Mg m}^{-3}$ ,  $\mu = 0.137 \text{ mm}^{-1}$ ,  $2\theta_{\text{max}} = 59.20^\circ$ , 34410 measured reflections, 6342 independent reflections ( $R_{\text{int}} = 0.0246$ ),  $R1$  [ $I > 2\sigma(I)$ ] = 0.0431,  $wR2$  [ $I > 2\sigma(I)$ ] = 0.1136, GOF = 1.058, 247 parameters, final difference map within 0.233 and  $-0.197 \text{ e}\text{Å}^{-3}$ . The structure was solved using direct methods and refined by full-matrix least-squares analysis on  $F^2$ . CCDC 986150 contains the supplementary crystallographic data for this paper. These data can be obtained free of charge from The Cambridge Crystallographic Data Center via [www.ccdc.cam.ac.uk/data\\_request/cif](http://www.ccdc.cam.ac.uk/data_request/cif). Selected bond lengths (Å) and angles (deg): P1-C18 1.7878(15), P1-C19 1.816(2), P1-C21 1.808(2), P1-B1 1.908(2), N1-C17 1.3440(18), C17-C18 1.368(2), C18-N3 1.3615(19), N3-N2 1.2983(19), N2-N1 1.3536(17), N1-C4 1.4257(18), C18-P1-C21 104.30(9), C18-P1-C19 103.80(8).

**(R)-1-Benzyl-4-(methyl-*tert*-butylphosphino-borane)-1*H*-1,2,3-triazole (9)**

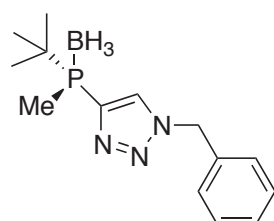

C<sub>14</sub>H<sub>23</sub>BN<sub>3</sub>P  
M = 275.14 g.mol<sup>-1</sup>  
White solid  
Mp = 125–126 °C  
R<sub>f</sub> = 0.4 (Pentane/Et<sub>2</sub>O: 3/1)

Yield: 80% (176 mg), obtained from **8** (240 mg, 0.8 mmol) after 3 h of stirring at 25–30 °C. <sup>1</sup>H NMR (400 MHz, CDCl<sub>3</sub>) δ 7.89 (s, 1H), 7.40–7.37 (m, 3H), 7.29–7.26 (m, 2H), 5.57 (s, 2H), 1.64 (d, *J*<sub>HP</sub> = 10.0 Hz, 3H), 1.16 (d, *J*<sub>HP</sub> = 14.8 Hz, 9H), 0.90–0.30 (m, 3H). <sup>13</sup>C NMR (100 MHz, CDCl<sub>3</sub>) δ 137.7 (d, *J*<sub>CP</sub> = 69.5 Hz), 133.9, 131.3 (d, *J*<sub>CP</sub> = 26.9 Hz), 129.3, 129.1, 128.1, 54.3, 28.5 (d, *J*<sub>CP</sub> = 35.5 Hz), 25.2 (d, *J*<sub>CP</sub> = 3.0 Hz), 5.5 (d, *J*<sub>CP</sub> = 39.1 Hz). <sup>31</sup>P NMR (162 MHz, CDCl<sub>3</sub>) δ 13.4 (m). <sup>11</sup>B NMR (128 MHz, CDCl<sub>3</sub>) δ -40.7 (m). IR (ATR, cm<sup>-1</sup>) ν 3117, 2923, 2854, 2377, 1498, 1460, 1417, 1365, 1214, 1104, 1067, 905, 889, 722. HRMS (ESI) Calcd for C<sub>14</sub>H<sub>23</sub>BN<sub>3</sub>NaP [M+Na]<sup>+</sup>: 298.1620 Found: 298.1624. [α]<sub>D</sub> -21 (c 0.01, CHCl<sub>3</sub>), 98.8% ee (*R*). The ee value was determined by HPLC analysis (Daicel Chiralpak IC 4, *n*-heptane/propan-2-ol = 90/10, flow rate = 1.0 mL.min<sup>-1</sup>, 210 nm, *t*<sub>R</sub> = 9.71 min (*S*), *t*<sub>R</sub> = 12.92 min (*R*)).

Recrystallisation at 4 °C from CH<sub>2</sub>Cl<sub>2</sub>/pentane gave colourless single crystals.

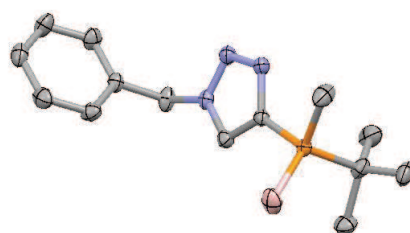

**Crystallographic data:** Bruker Kappa APEXII CCD diffractometer (MoK<sub>α</sub> λ = 0.71073 Å; graphite monochromator; *T* = 150(2) K. Formula C<sub>14</sub>H<sub>23</sub>BN<sub>3</sub>P, formula weight 275.13, crystal system orthorhombic, space group *P*2(1)2(1)2(1), crystal dimensions 0.32 x 0.32 x 0.28 mm<sup>3</sup>, *a* = 9.8500(2), *b* = 11.1410(2), *c* = 14.4209(3) Å, α = γ = β = 90.00°, *V* = 1582.53(5) Å<sup>3</sup>, *Z* = 4, ρ<sub>calcd</sub> = 1.155 Mg m<sup>-3</sup>, μ = 0.164 mm<sup>-1</sup>, 2θ<sub>max</sub> = 68.98°, 32222 measured reflections, 6676 independent reflections (*R*<sub>int</sub> = 0.0252), *R*1 [*I* > 2σ(*I*)] = 0.0338, *wR*2 [*I* > 2σ(*I*)] = 0.0799, GOF = 1.076, 219 parameters, final difference map within 0.315 and -0.214 eÅ<sup>-3</sup>. Flack parameter = 0.01(5). The structure was solved using direct methods and refined by full-matrix least-squares analysis on *F*<sup>2</sup>. CCDC 986151 contains the supplementary crystallographic data for this paper. These data can be obtained free of charge from The Cambridge Crystallographic Data Center via [www.ccdc.cam.ac.uk/data\\_request/cif](http://www.ccdc.cam.ac.uk/data_request/cif). Selected bond lengths (Å) and angles (deg): P1-C1 1.7974(9), P1-C10 1.8491(10), P1-C14 1.7956(11), P1-B1 1.9137(14), C1-C2 1.3772(12), C2-N3 1.3494(13), N3-N2 1.3476(12), N2-N1 1.3116(12), N1-C1 1.3699(12), N3-C3 1.4656(12), C1-P1-C14 102.83(5), C1-P1-C10 106.64(4), C14-P1-C10 107.51(6).

**Dichlorobis[1-benzyl-4-(di-*tert*-butylphosphino)-1*H*-1,2,3-triazole]palladium(II) (10):** A mixture of triazolylphosphine-borane **2f** (300 mg, 0.95 mmol, 1 equiv.) and DABCO (531 mg, 4.73 mmol, 5 equiv.) in THF (5 mL) was heated at 70 °C under an argon atmosphere for 3 h and then concentrated under reduced pressure. The residue was next filtered on silica gel using degassed Et<sub>2</sub>O (100 mL) as the eluent directly into a round bottomed flask containing a suspension of PdCl<sub>2</sub>(PhCN)<sub>2</sub> (181 mg, 0.47 mmol, 0.5 equiv.) in Et<sub>2</sub>O (5 mL). The resulting yellow solution was stirred for 30 min at rt and then concentrated under reduced pressure. The residual yellow solid was washed with pentane to afford the desired product as a yellow solid (343 mg, 93% yield).

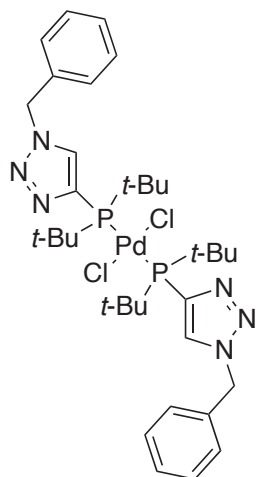

C<sub>34</sub>H<sub>52</sub>Cl<sub>2</sub>N<sub>6</sub>P<sub>2</sub>Pd  
 M = 784.09 g·mol<sup>-1</sup>  
 Yellow solid  
 Decomposition at 215–220 °C

<sup>1</sup>H NMR (400 MHz, CD<sub>2</sub>Cl<sub>2</sub>) δ 7.76 (s, 2H), 7.36–7.34 (m, 6H), 7.22–7.20 (m, 4H), 5.59 (s, 4H), 1.56–1.51 (m, 36H). <sup>13</sup>C NMR (100 MHz, CD<sub>2</sub>Cl<sub>2</sub>) δ 136.5 (t<sub>app</sub>, J<sub>CP</sub> = 25 Hz), 135.1, 133.1 (t<sub>app</sub>, J<sub>CP</sub> = 12 Hz), 128.9, 128.4, 127.4, 53.6, 38.2 (t<sub>app</sub>, J<sub>CP</sub> = 8.5 Hz), 30.6 (t<sub>app</sub>, J<sub>CP</sub> = 2.5 Hz). <sup>31</sup>P NMR (162 MHz, CD<sub>2</sub>Cl<sub>2</sub>) δ 33.8. IR (ATR, cm<sup>-1</sup>) ν 3144, 2963, 2898, 1498, 1497, 1476, 1456, 1441, 1391, 1363, 1203, 1174, 1107, 1048, 1024, 930, 811, 716, 702 cm<sup>-1</sup>. HRMS (ESI) Calcd for C<sub>34</sub>H<sub>52</sub>ClN<sub>6</sub>P<sub>2</sub>Pd [M-Cl]<sup>+</sup>: 747.2452. Found: 747.2436.

Recrystallisation at rt from CH<sub>2</sub>Cl<sub>2</sub>/Et<sub>2</sub>O gave yellow single crystals.

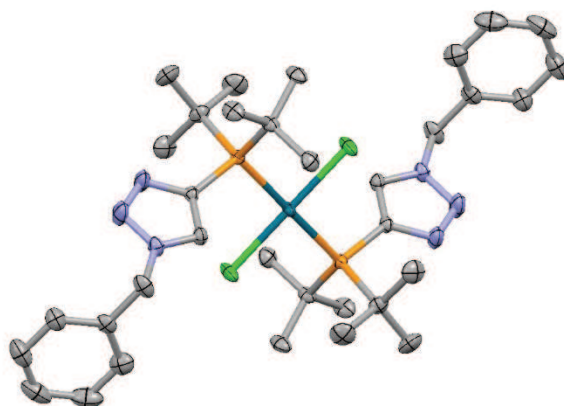

**Crystallographic data:** Bruker Kappa APEXII CCD diffractometer (MoK<sub>α</sub> λ = 0.71073 Å; graphite monochromator; T = 150(2) K. Formula C<sub>34</sub>H<sub>52</sub>BCl<sub>2</sub>N<sub>6</sub>P<sub>2</sub>Pd, formula weight 784.06, crystal system monoclinic, space group P2(1)/c, crystal dimensions 0.48 x 0.41 x 0.38 mm<sup>3</sup>, a

$a = 10.2656(5)$ ,  $b = 20.6740(10)$ ,  $c = 9.0479(4)$  Å,  $\alpha = \gamma = 90.00^\circ$ ,  $\beta = 100.041(2)^\circ$ ,  $V = 1890.83(15)$  Å<sup>3</sup>,  $Z = 2$ ,  $\rho_{\text{calcd}} = 1.377$  Mgm<sup>-3</sup>,  $\mu = 0.749$  mm<sup>-1</sup>,  $2\theta_{\text{max}} = 71.04^\circ$ , 39732 measured reflections, 5081 independent reflections ( $R_{\text{int}} = 0.0289$ ),  $R1 [I > 2\sigma(I)] = 0.0196$ ,  $wR2 [I > 2\sigma(I)] = 0.0508$ , GOF = 1.053, 211 parameters, final difference map within 0.315 and  $-0.214$  eÅ<sup>-3</sup>. The structure was solved using direct methods and refined by full-matrix least-squares analysis on  $F^2$ . CCDC 986152 contains the supplementary crystallographic data for this paper. These data can be obtained free of charge from The Cambridge Crystallographic Data Center via [www.ccdc.cam.ac.uk/data\\_request/cif](http://www.ccdc.cam.ac.uk/data_request/cif). Selected bond lengths (Å) and angles (deg): P1-Pd1 2.3756(3), P1-C1 1.8104(11), P1-C10 1.8767(12), P1-C14 1.8982(12), Pd1-C11 2.2961(3), C1-C2 1.3730(16), C2-N3 1.3381(14), N3-N2 1.3402(15), N2-N1 1.3130(16), N1-C1 1.3639(15), N3-C3 1.4661(15), C1-P1-C14 100.01(5), C1-P1-C10 105.02(5), C14-P1-C10 112.98(6), C11-Pd1-P1 89.894(11), C11a-Pd1-P1a 90.107(11).

### General procedure for borane decomplexation of triazolylphosphine-boranes 2:

A mixture of triazolylphosphine-borane **2** (1 equiv.) and DABCO (2 equiv. or 3 equiv. with dialkylphosphino derivatives) in THF was heated at 70 °C under a nitrogen atmosphere for 3 h. After removal of solvent the residue was purified by silica gel column chromatography with pentane/EtOAc as eluent (diphenylphosphino compounds) or was filtered through a neutral alumina column using degassed EtOAc/pentane (2/8) as eluent (diethyl/phenylmethylphosphino compounds).

### 1-Benzyl-4-(diethylphosphino)-1*H*-1,2,3-triazole (**1a**)

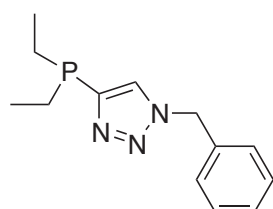

$\text{C}_{13}\text{H}_{18}\text{N}_3\text{P}$   
 $M = 247.28$  g.mol<sup>-1</sup>  
 White solid  
 $M_p = 52\text{--}53$  °C

Yield: 74% (77 mg) obtained from **2a** (110 mg, 0.42 mmol). <sup>1</sup>H NMR (400 MHz, CDCl<sub>3</sub>)  $\delta$  7.42 (s, 1H), 7.32–7.27 (m, 3H), 7.20–7.16 (m, 2H), 5.48 (s, 2H), 1.86–1.61 (m, 4H), 0.97 (dt,  $J_{\text{HP}} = 15.8$  Hz,  $J_{\text{HH}} = 7.6$  Hz, 6H). <sup>13</sup>C NMR (125 MHz, CDCl<sub>3</sub>)  $\delta$  145.2 (d,  $J_{\text{CP}} = 15.6$  Hz), 134.7, 129.1, 128.7, 128.4 (d,  $^2J_{\text{CP}} = 30.7$  Hz), 128.0, 53.9, 19.2 (d,  $J_{\text{CP}} = 6.7$  Hz), 10.0 (d,  $J_{\text{CP}} = 13.3$  Hz). <sup>31</sup>P NMR (162 MHz, CDCl<sub>3</sub>)  $\delta$  -39.1. HRMS (ESI) Calcd for  $\text{C}_{13}\text{H}_{19}\text{N}_3\text{P}$   $[\text{M}+\text{H}]^+$ : 248.1317. Found: 248.1315.

### 1-(4-Anisyl)-4-(diethylphosphino)-1*H*-1,2,3-triazole (**1c**)

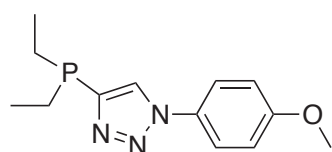

$\text{C}_{13}\text{H}_{18}\text{N}_3\text{PO}$   
 $M = 263.28$  g.mol<sup>-1</sup>  
 White solid  
 $M_p = 155\text{--}157$  °C



Yield: 61% (58 mg) obtained from **2c** (100 mg, 0.36 mmol).  $^1\text{H}$  NMR (400 MHz,  $\text{CDCl}_3$ )  $\delta$  7.92 (s, 1H), 7.62 (d,  $J_{\text{HH}} = 9.2$  Hz, 2H), 6.99 (d,  $J_{\text{HH}} = 9.2$  Hz, 2H), 3.84 (s, 3H), 1.97–1.75 (m, 4 H), 1.06 (dt,  $J_{\text{HP}} = 16.0$  Hz,  $J_{\text{HH}} = 7.6$  Hz, 6H).  $^{13}\text{C}$  NMR (100 MHz,  $\text{CDCl}_3$ )  $\delta$  159.8, 145.4 (d,  $J_{\text{CP}} = 17.1$  Hz), 130.5, 126.7 (d,  $J_{\text{CP}} = 31.2$  Hz), 122.2, 114.8, 55.7 (d,  $J_{\text{CP}} = 2.0$  Hz), 19.3 (d,  $J_{\text{CP}} = 6.0$  Hz), 10.0 (d,  $J_{\text{CP}} = 13.1$  Hz.).  $^{31}\text{P}$  NMR (162 MHz,  $\text{CDCl}_3$ )  $\delta$  -39.1. HRMS (ESI) Calcd for  $\text{C}_{13}\text{H}_{19}\text{N}_3\text{OP}$   $[\text{M}+\text{H}]^+$ : 264.1266. Found: 264.1264.

#### 4-(Diethylphosphino)-1-(4-trifluoromethylphenyl)-1H-1,2,3-triazole (**1e**)

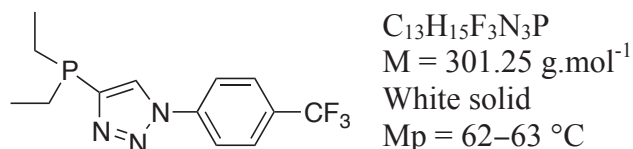

Yield: 88% (189 mg) obtained from **2e** (225 mg, 0.71 mmol).  $^1\text{H}$  NMR (400 MHz,  $\text{CDCl}_3$ )  $\delta$  8.08 (s, 1H), 7.91 (d,  $J_{\text{HH}} = 8.8$  Hz, 2H), 7.80 (d,  $J_{\text{HH}} = 8.8$  Hz, 2H), 2.00–1.78 (m, 4H), 1.08 (dt,  $J_{\text{HP}} = 16.0$  Hz,  $J_{\text{HH}} = 7.6$  Hz, 6H).  $^{13}\text{C}$  NMR (100 MHz,  $\text{CDCl}_3$ )  $\delta$  146.6 (d,  $J_{\text{CP}} = 19.1$  Hz), 139.3, 130.6 (q,  $J_{\text{CF}} = 33.2$  Hz), 127.1 (q,  $J_{\text{CF}} = 4.0$  Hz), 126.4 (d,  $J_{\text{CP}} = 31.2$  Hz), 123.6 (q,  $J_{\text{CF}} = 271.6$  Hz), 120.8, 19.1 (d,  $J_{\text{CP}} = 7.0$  Hz), 9.9 (d,  $J_{\text{CP}} = 13.1$  Hz).  $^{31}\text{P}$  NMR (162 MHz,  $\text{CDCl}_3$ )  $\delta$  -38.7.  $^{19}\text{F}$  NMR (376 MHz,  $\text{CDCl}_3$ )  $\delta$  -62.6. HRMS (ESI) Calcd for  $\text{C}_{13}\text{H}_{16}\text{N}_3\text{F}_3\text{P}$   $[\text{M}+\text{H}]^+$ : 302.1034. Found: 302.1037.

Recrystallisation at rt by slow diffusion of pentane into a  $\text{CHCl}_3$  solution gave colourless single crystals.

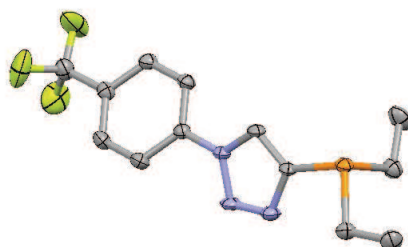

**Crystallographic data** : Bruker Kappa APEXII CCD diffractometer ( $\text{MoK}_\alpha$   $\lambda=0.71073 \text{ \AA}$ ; graphite monochromator;  $T=140(2) \text{ K}$ . Formula  $\text{C}_{13}\text{H}_{15}\text{F}_3\text{N}_3\text{P}$ , formula weight 301.25, crystal system monoclinic, space group  $P2(1)$ , crystal dimensions  $0.35 \times 0.29 \times 0.15 \text{ mm}^3$ ,  $a=5.4783(5)$ ,  $b=6.9229(6)$ ,  $c=18.7771(17) \text{ \AA}$ ,  $\alpha=\gamma=90.00^\circ$ ,  $\beta=95.059(3)^\circ$ ,  $V=709.36(11) \text{ \AA}^3$ ,  $Z=2$ ,  $\rho_{\text{calcd}}=1.410 \text{ Mg}\cdot\text{m}^{-3}$ ,  $\mu=0.221 \text{ mm}^{-1}$ ,  $2\theta_{\text{max}}=59.12^\circ$ , 8283 measured reflections, 3679 independent reflections ( $R_{\text{int}}=0.0343$ ),  $R1$   $[I>2\sigma(I)]=0.0427$ ,  $wR2$   $[I>2\sigma(I)]=0.0979$ ,  $\text{GOF}=1.111$ , 183 parameters, final difference map within 0.414 and  $-0.392 \text{ e}\cdot\text{\AA}^{-3}$ . The structure was solved using direct methods and refined by full-matrix least-squares analysis on  $F^2$ . CCDC 986144 contains the supplementary crystallographic data for this paper. These data can be obtained free of charge from The Cambridge Crystallographic Data Center via [www.ccdc.cam.ac.uk/data\\_request/cif](http://www.ccdc.cam.ac.uk/data_request/cif). Selected bond lengths ( $\text{\AA}$ ) and angles (deg): P1-C1 1.817(2), P1-C12 1.846(2), P1-C10 1.850(2), C3-N1 1.424(3), C2-N1 1.358(3), N1-N2

1.358(3), N2-N3 1.302(3), N3-C1 1.380(3), C1-C2 1.376(3), C1-P1-C12 99.16(10), C1-P1-C10 98.71(10), N1-C2-C1 105.63(18), C2-C1-N3 107.06(19), N2-N1-C2 110.00(17), N2-N3-C1 109.70(18), N3-N2-N1 107.61(17).

### 1-Benzyl-4-(phenylmethylphosphino)-1*H*-1,2,3-triazole (1g)

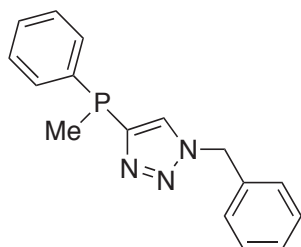

$C_{16}H_{16}N_3P$

$M = 281.29 \text{ g}\cdot\text{mol}^{-1}$

White solid

Mp = 155–157 °C

Yield: 71% (204 mg) obtained from **2g** (300 mg, 1.01 mmol).  $^1\text{H}$  NMR (400 MHz,  $\text{CDCl}_3$ )  $\delta$  7.55–7.49 (m, 2H), 7.41 (s, 1H), 7.37–7.24 (m, 8H), 5.54 and 5.49 (AB,  $J_{\text{AB}} = 14.8 \text{ Hz}$ , 2H), 1.72 (d,  $J_{\text{HP}} = 3.6 \text{ Hz}$ , 3H).  $^{13}\text{C}$  NMR (125 MHz,  $\text{CDCl}_3$ )  $\delta$  146.4 (d,  $J_{\text{CP}} = 9.3 \text{ Hz}$ ), 138.7 (d,  $J_{\text{CP}} = 9.2 \text{ Hz}$ ), 134.6, 132.1 (d,  $J_{\text{CP}} = 19.6 \text{ Hz}$ ), 129.1, 128.8, 128.6 (d,  $J_{\text{CP}} = 33.4 \text{ Hz}$ ), 128.4, 128.1, 127.8 (d,  $J_{\text{CP}} = 29.2 \text{ Hz}$ ), 54.0, 11.8 (d,  $J_{\text{CP}} = 8.9 \text{ Hz}$ ).  $^{31}\text{P}$  NMR (162 MHz,  $\text{CDCl}_3$ )  $\delta$  -51.3. HRMS (ESI) Calcd for  $C_{16}H_{17}N_3P$   $[M+H]^+$ : 282.1160. Found: 282.1152.

### 1-Benzyl-4-(diphenylphosphino)-1*H*-1,2,3-triazole (1i)

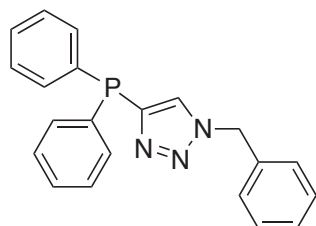

$C_{21}H_{18}N_3P$

$M = 343.36 \text{ g}\cdot\text{mol}^{-1}$

White solid

Mp = 97–99 °C

Yield: 92% (230 mg) obtained from **2i** (261 mg, 0.73 mmol).  $^1\text{H}$  NMR (400 MHz,  $\text{CDCl}_3$ )  $\delta$  7.39–7.32 (m, 4H), 7.29–7.19 (m, 10H), 7.15–7.13 (m, 2H), 5.43 (s, 2H).  $^{13}\text{C}$  NMR (100 MHz,  $\text{CDCl}_3$ )  $\delta$  145.0 (d,  $J_{\text{CP}} = 5.8 \text{ Hz}$ ), 136.5 (d,  $J_{\text{CP}} = 6.8 \text{ Hz}$ ), 134.6, 133.6 (d,  $J_{\text{CP}} = 20.0 \text{ Hz}$ ), 129.4 (d,  $^2J_{\text{CP}} = 25.6 \text{ Hz}$ ), 129.2, 129.0, 128.8, 128.6 (d,  $J_{\text{CP}} = 7.3 \text{ Hz}$ ), 128.1, 54.0.  $^{31}\text{P}$  NMR (162 MHz,  $\text{CDCl}_3$ )  $\delta$  -31.9. HRMS (ESI) Calcd for  $C_{21}H_{19}N_3P$   $[M+H]^+$ : 344.1317. Found: 344.1306.

Recrystallisation at -20 °C from  $\text{CH}_2\text{Cl}_2$ /pentane gave colourless single crystals.

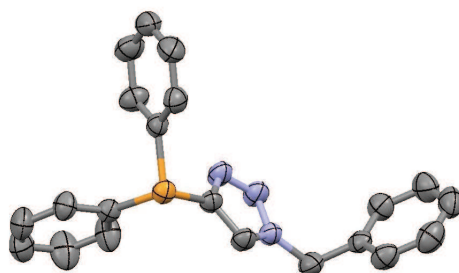

**Crystallographic data :** Bruker Kappa APEXII CCD diffractometer ( $\text{MoK}\alpha$   $\lambda = 0.71073$  Å; graphite monochromator;  $T = 291(2)$  K. Formula  $\text{C}_{21}\text{H}_{18}\text{N}_3\text{P}$ , formula weight 343.35, crystal system monoclinic, space group  $P2(1)/c$ , crystal dimensions  $0.51 \times 0.32 \times 0.21$  mm<sup>3</sup>,  $a=10.0928(3)$ ,  $b=10.6178(3)$ ,  $c=17.3125(5)$  Å,  $\alpha=\gamma=90.00^\circ$ ,  $\beta=98.415(2)^\circ$ ,  $V=1835.29(9)$  Å<sup>3</sup>,  $Z=4$ ,  $\rho_{\text{calcd}}=1.243$  Mgm<sup>-3</sup>,  $\mu=0.157$  mm<sup>-1</sup>,  $2\theta_{\text{max}}=52.76^\circ$ , 43181 measured reflections, 4717 independent reflections ( $R_{\text{int}}=0.0272$ ),  $R1 [I>2\sigma(I)]=0.0375$ ,  $wR2 [I>2\sigma(I)]=0.0942$ , GOF=1.039, 298 parameters, final difference map within 0.202 and -0.211 eÅ<sup>-3</sup>. The structure was solved using direct methods and refined by full-matrix least-squares analysis on  $F^2$ . CCDC 986145 contains the supplementary crystallographic data for this paper. These data can be obtained free of charge from The Cambridge Crystallographic Data Center via [www.ccdc.cam.ac.uk/data\\_request/cif](http://www.ccdc.cam.ac.uk/data_request/cif). Selected bond lengths (Å) and angles (deg): P1-C1 1.8147(13), P1-C10 1.8325(14), P1-C16 1.8315(13), C1-C2 1.3713(18), C2-N3 1.3382(17), N3-N2 1.3420(15), N2-N1 1.3108(17), C1-P1-C16 102.25(6), C1-P1-C10 103.00(6), C16-P1-C10 101.78(6).

### 1-(4-Bromophenyl)-4-(diphenylphosphino)-1H-1,2,3-triazole (1j)

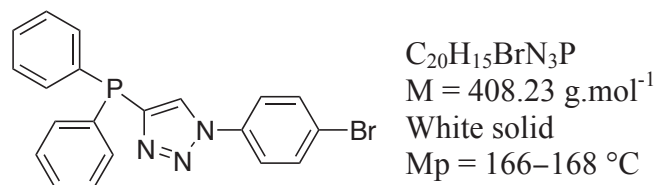

Yield: 91% (220 mg) obtained from **2j** (250 mg, 0.59 mmol). <sup>1</sup>H NMR (400 MHz, CDCl<sub>3</sub>)  $\delta$  7.78 (s, 1H), 7.64–7.57 (m, 4H), 7.53–7.48 (m, 4H), 7.37–7.35 (m, 6H). <sup>13</sup>C NMR (100 MHz, CDCl<sub>3</sub>)  $\delta$  146.2 (d,  $J_{\text{CP}} = 7.7$  Hz), 136.0 (d,  $J_{\text{CP}} = 6.9$  Hz), 135.9, 133.6 (d,  $J_{\text{CP}} = 20.1$  Hz), 133.0, 129.3, 128.8 (d,  $J_{\text{CP}} = 7.3$  Hz), 127.1 (d,  $J_{\text{CP}} = 23.8$  Hz), 122.6, 122.1. <sup>31</sup>P NMR (162 MHz, CDCl<sub>3</sub>)  $\delta$  -31.8. HRMS (ESI) Calcd for  $\text{C}_{20}\text{H}_{16}\text{BrN}_3\text{P}$   $[\text{M}+\text{H}]^+$ : 408.0265. Found: 408.0257.

Recrystallisation at -20 °C from CH<sub>2</sub>Cl<sub>2</sub>/pentane gave colorless single crystals.

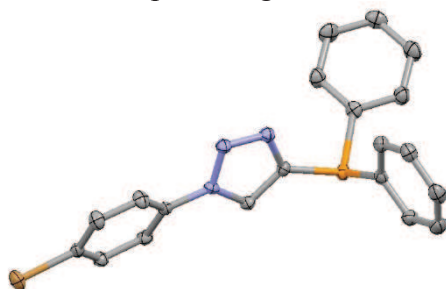

**Crystallographic data :** Bruker Kappa APEXII CCD diffractometer ( $\text{MoK}\alpha$   $\lambda = 0.71073$  Å; graphite monochromator;  $T = 150(2)$  K. Formula  $\text{C}_{20}\text{H}_{15}\text{BrN}_3\text{P}$ , formula weight 408.23, crystal system triclinic, space group  $P-1$ , crystal dimensions  $0.41 \times 0.13 \times 0.06$  mm<sup>3</sup>,  $a = 5.7216(2)$ ,  $b = 12.5095(5)$ ,  $c = 12.5281(5)$  Å,  $\alpha = 86.643(2)^\circ$ ,  $\beta = 79.834(2)^\circ$ ,  $\gamma = 82.749(6)$ ,  $V = 874.95(6)$  Å<sup>3</sup>,  $Z = 2$ ,  $\rho_{\text{calcd}} = 1.550$  Mgm<sup>-3</sup>,  $\mu = 2.448$  mm<sup>-1</sup>,  $2\theta_{\text{max}} = 64.10^\circ$ , 11222 measured reflections, 4448 independent reflections ( $R_{\text{int}}=0.0228$ ),  $R1 [I>2\sigma(I)] = 0.0271$ ,

$wR2 [I > 2\sigma(I)] = 0.0597$ , GOF = 1.033, 226 parameters, final difference map within 0.315 and  $-0.214 \text{ e}\text{\AA}^{-3}$ . The structure was solved using direct methods and refined by full-matrix least-squares analysis on  $F^2$ . CCDC 986146 contains the supplementary crystallographic data for this paper. These data can be obtained free of charge from The Cambridge Crystallographic Data Center via [www.ccdc.cam.ac.uk/data\\_request/cif](http://www.ccdc.cam.ac.uk/data_request/cif). Selected bond lengths ( $\text{\AA}$ ) and angles (deg): P1-C6 1.8174(16), P1-C7 1.8352(17), P1-C13 1.8350(17), C5-C6 1.375(2), C6-N3 1.375(2), N3-N2 1.3086(19), N2-N1 1.3596(18), N1-C5 1.351(2), C6-P1-C7 102.68(7), C6-P1-C13 101.05(7), C7-P1-C13 101.87(7).

### 1-(4-Trifluoromethylphenyl)-4-(diphenylphosphino)-1H-1,2,3-triazole (1k)

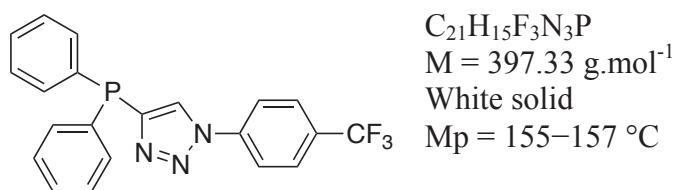

Yield: 97% (65 mg) obtained from **2k** (70 mg, 0.17 mmol).  $^1\text{H}$  NMR (400 MHz,  $\text{CDCl}_3$ )  $\delta$  7.86 (d,  $J_{\text{HH}} = 8.4 \text{ Hz}$ , 2H), 7.85 (s, 1H), 7.78 (d,  $J_{\text{HH}} = 8.4 \text{ Hz}$ , 2H), 7.54–7.49 (m, 4H), 7.40–7.35 (m, 6H).  $^{13}\text{C}$  NMR (100 MHz,  $\text{CDCl}_3$ )  $\delta$  146.6 (d,  $J_{\text{CP}} = 9.0 \text{ Hz}$ ), 139.3, 135.9 (d,  $J_{\text{CP}} = 7.0 \text{ Hz}$ ), 133.7 (d,  $J_{\text{CP}} = 20.1 \text{ Hz}$ ), 130.9 (q,  $J_{\text{CF}} = 33.2 \text{ Hz}$ ), 129.4, 128.8 (d,  $J_{\text{CP}} = 7.0 \text{ Hz}$ ), 127.2 (q,  $J_{\text{CF}} = 3 \text{ Hz}$ ), 127.0, 123.6 (q,  $J_{\text{CF}} = 271.6 \text{ Hz}$ ), 120.6.  $^{31}\text{P}$  NMR (202 MHz,  $\text{CDCl}_3$ )  $\delta$   $-31.8$ .  $^{19}\text{F}$  NMR (376 MHz,  $\text{CDCl}_3$ )  $\delta$   $-62.7$ . IR (ATR,  $\text{cm}^{-1}$ )  $\nu$  3146, 1615, 1523, 1434, 1321, 1164, 1123, 1109, 1067, 1031, 845, 744, 695. HRMS (ESI) Calcd for  $\text{C}_{21}\text{H}_{15}\text{N}_3\text{F}_3\text{NaP}$   $[\text{M}+\text{Na}]^+$ : 420.0853. Found: 420.0838.

**General procedure for the Suzuki-Miyaura cross-coupling reactions:** A Schlenk tube was charged with boronic acid **12** (1.5 mmol, 1.5 equiv.),  $\text{K}_3\text{PO}_4$  (2 mmol, 2 equiv.) and Pd(II)-complex **10** (1 or 0.1 mol%). The flask was evacuated and backfilled with argon three times. Toluene (3 mL) and aryl chloride **11** (1 mmol) were subsequently added. The reaction mixture was stirred at  $100 \text{ }^\circ\text{C}$  under argon atmosphere for 12 hours then cooled to rt, extracted with EtOAc, washed with  $\text{H}_2\text{O}$  and brine. The organic layer was dried over  $\text{MgSO}_4$  and concentrated under reduced pressure. The crude product was finally purified by flash column chromatography on silica gel with Pentane/ $\text{CH}_2\text{Cl}_2$  (19:1) as eluent to afford bis-arenes **13**.

$^1\text{H}$  and  $^{13}\text{C}$  NMR data for compounds **13a**,<sup>6</sup> **13b**,<sup>7</sup> and **13c**<sup>8</sup> were in good agreement with the literature data.

### References:

- 1 E. Bernoud, C. Alayrac, O. Delacroix and A.-C. Gaumont, *Chem. Commun.*, 2011, **47**, 3239–3241.
- 2 X. Zhao, A. J. Lough and D. W. Stephan, *Chem. Eur. J.*, 2011, **17**, 6731–6743.
- 3 L. Hong, W. Lin, F. Zhang, R. Liu and X. Zhou, *Chem. Commun.*, 2013, **49**, 5589–5591.
- 4 H. Lebel, S. Morin and V. Paquet, *Org. Lett.*, 2003, **5**, 2347–2349.
- 5 K. Nagata, S. Matsukawa and T. Imamoto, *J. Org. Chem.*, 2000, **65**, 4185–4188.
- 6 D. Liu, W. Gao, Q. Dai and X. Zhang, *Org. Lett.*, 2005, **7**, 4907–4910.
- 7 Z. Zhang and Z. Wang, *J. Org. Chem.*, 2006, **71**, 7485–7487.
- 8 I. J. S. Fairlamb, A. R. Kapdi and A. F. Lee, *Org. Lett.*, 2004, **6**, 4435–4438.

### 3. $^1\text{H}$ , $^{31}\text{P}$ and $^{13}\text{C}$ NMR Spectra

#### 1-Benzyl-4-(diethylphosphino-borane)-1*H*-1,2,3-triazole (2a)

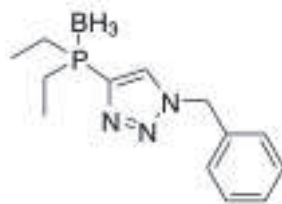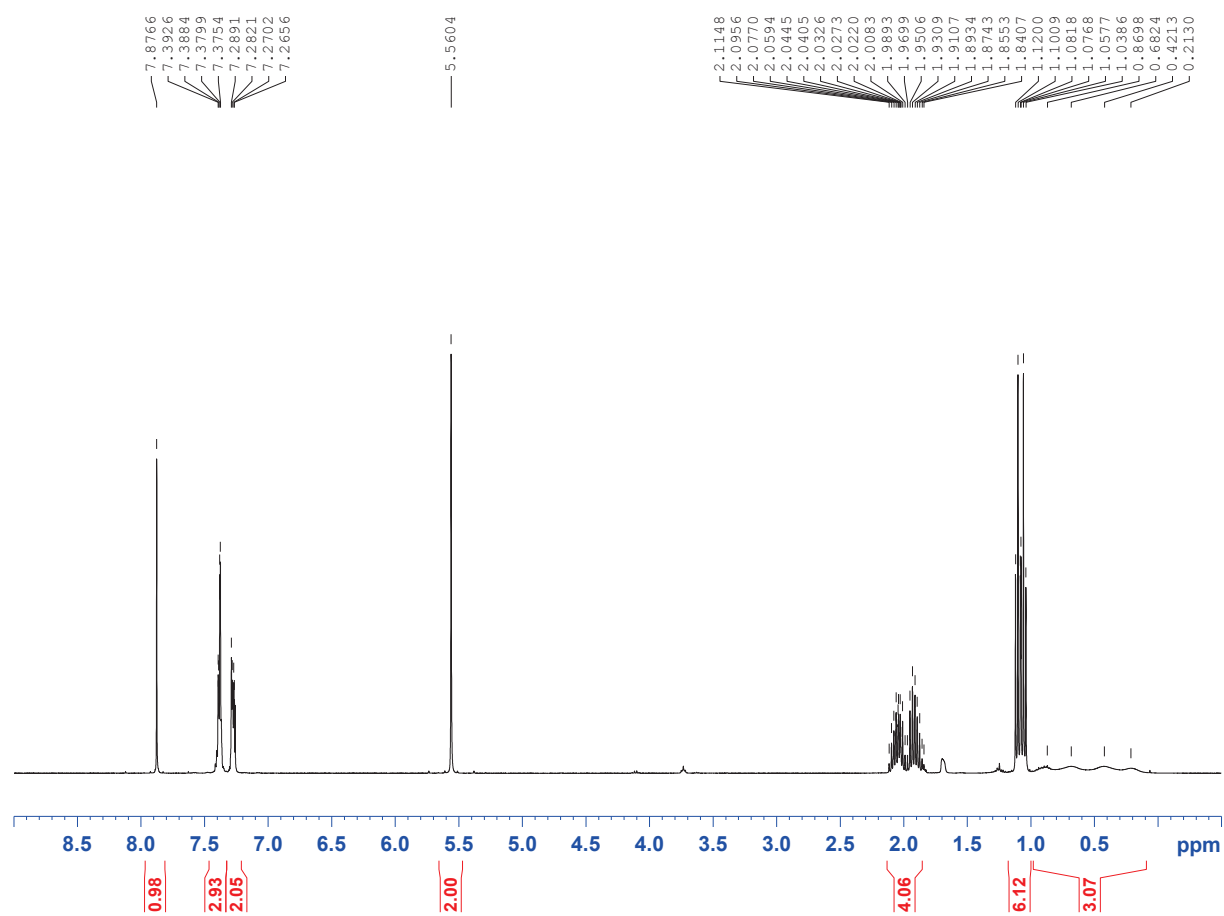

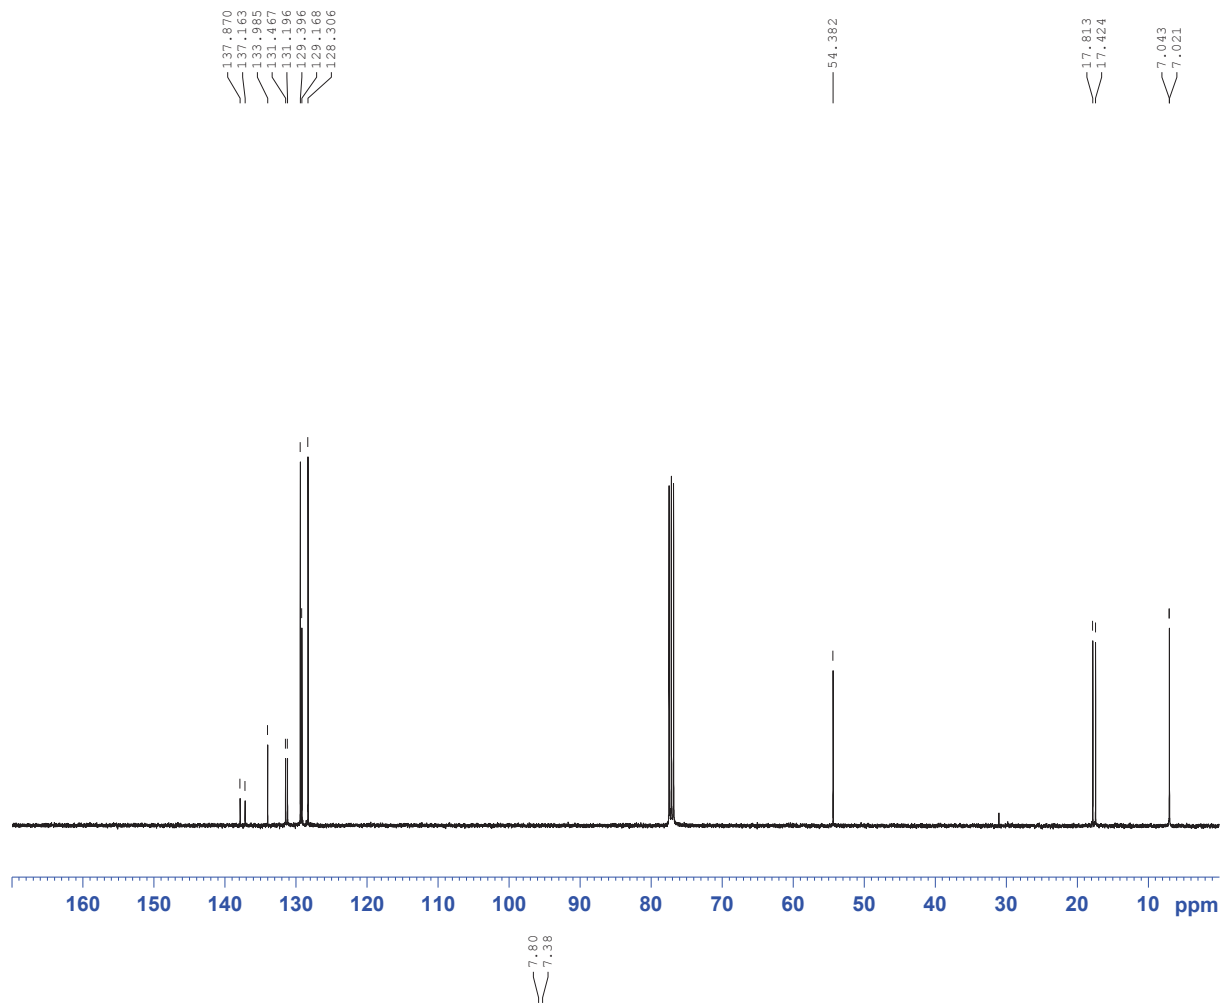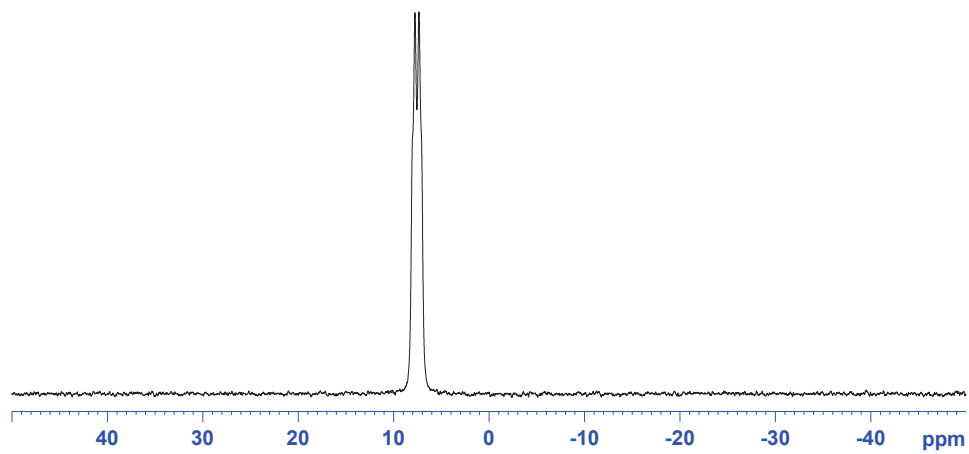

# 4-(Diethylphosphino-borane)-1-phenyl-1*H*-1,2,3-triazole (2b)

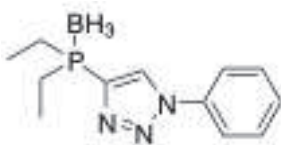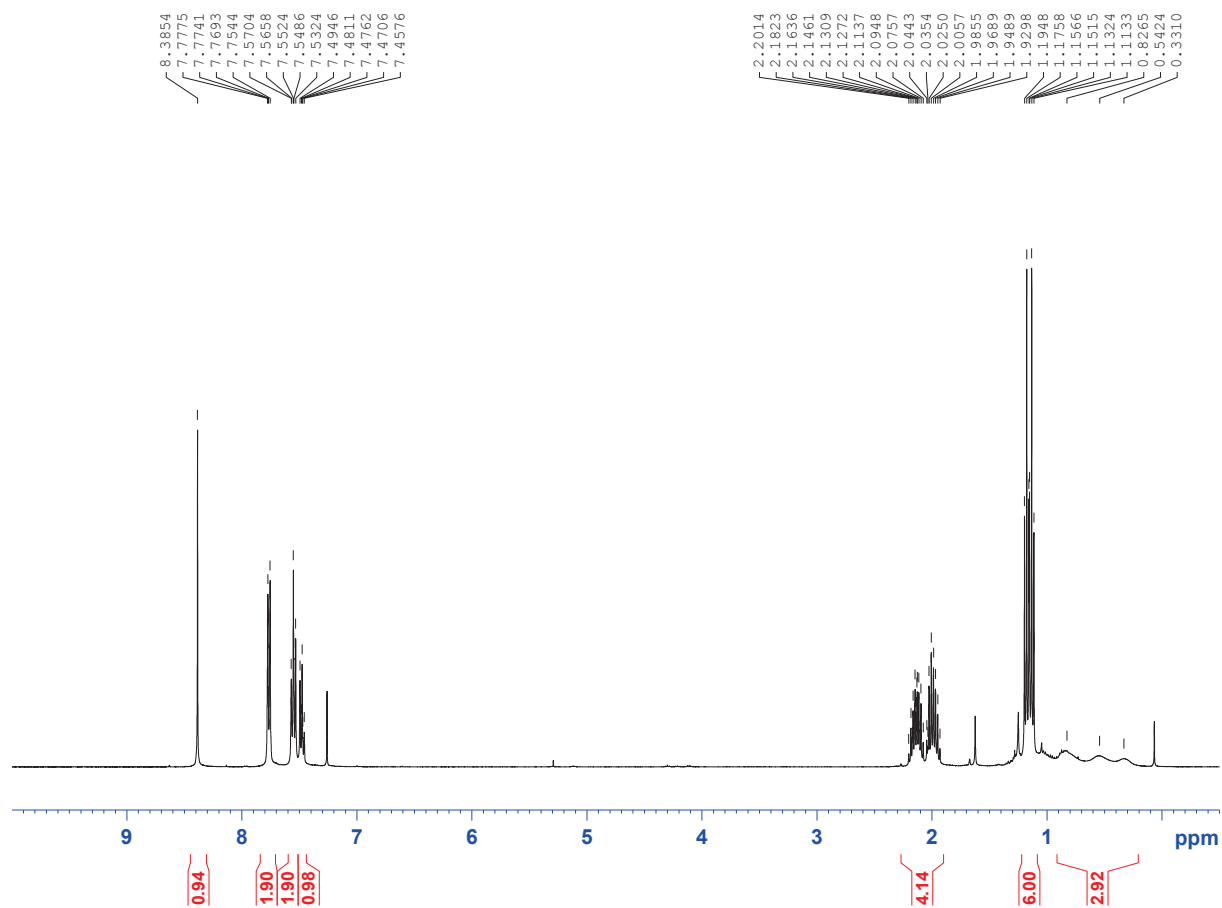

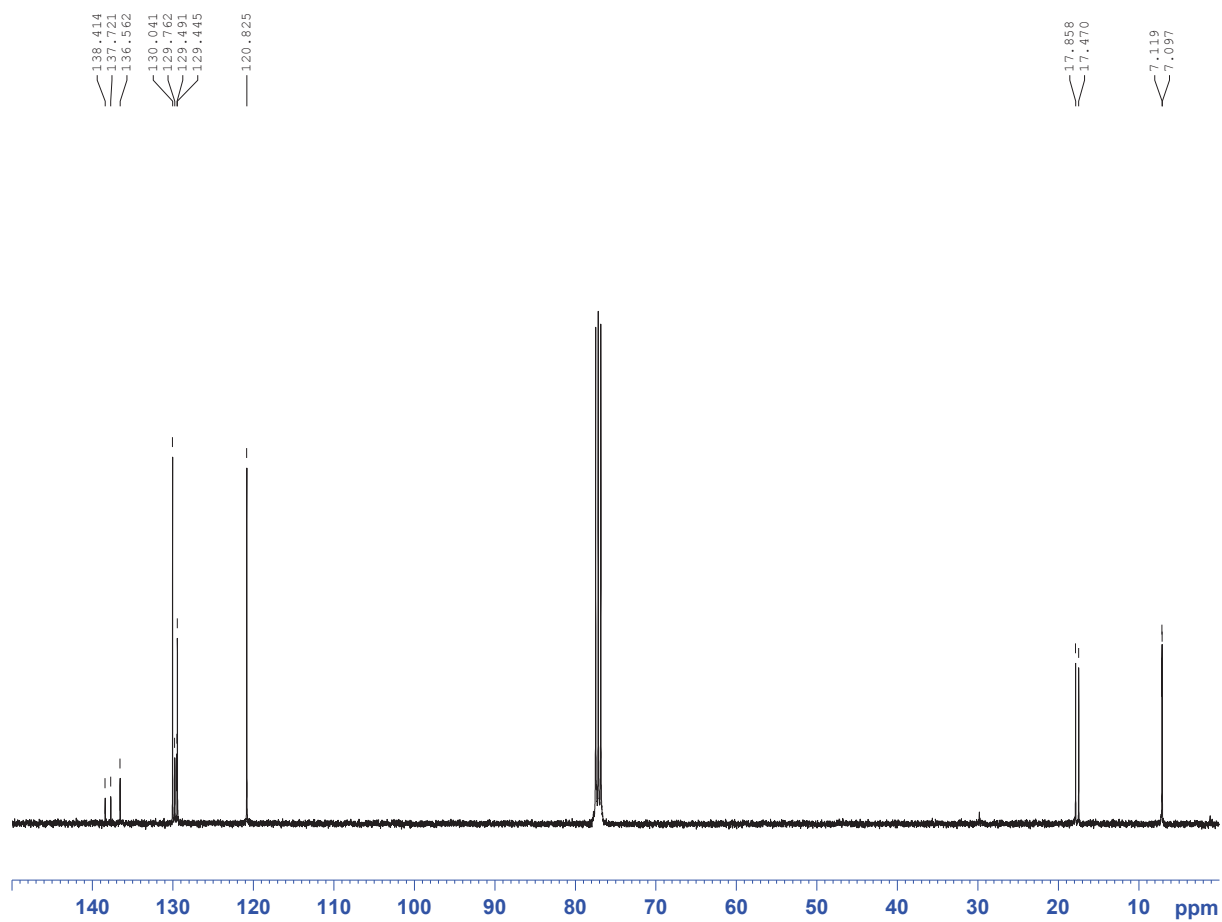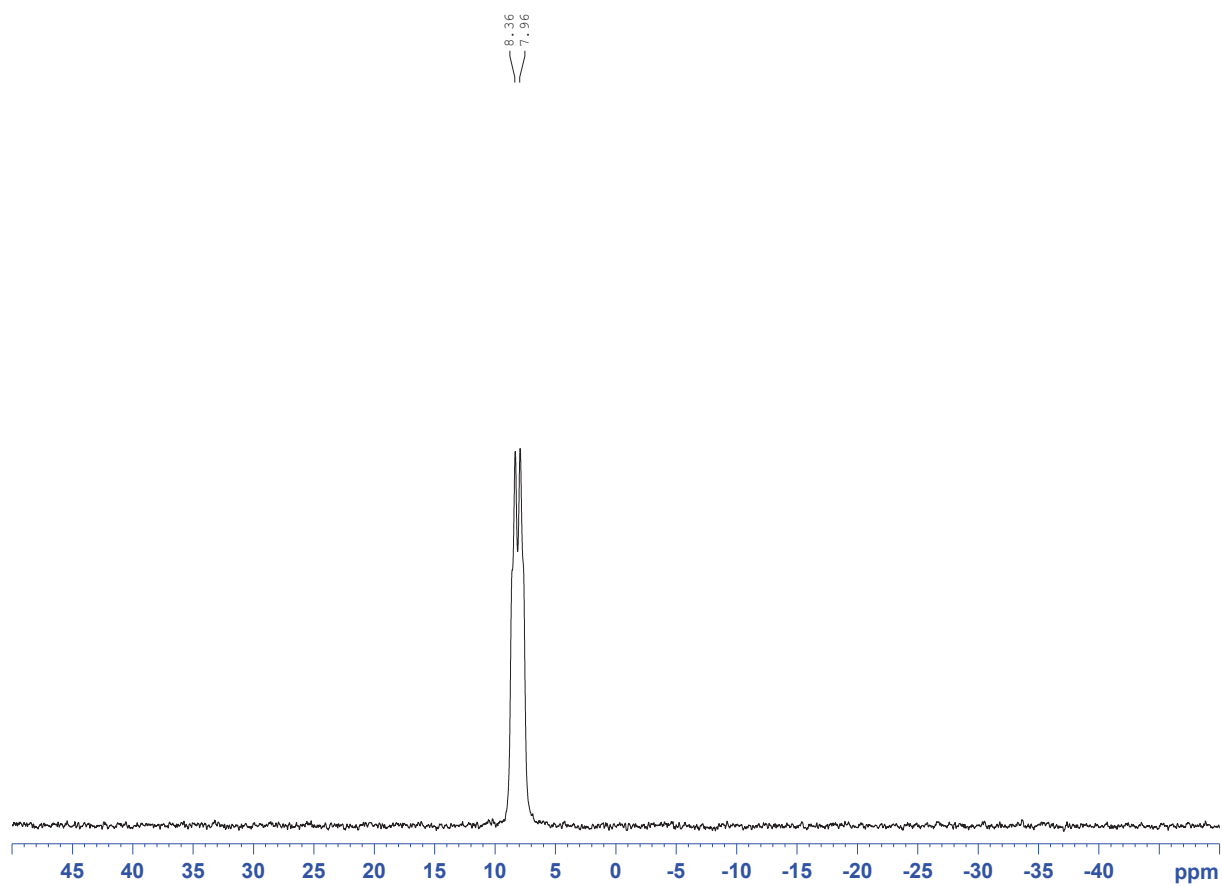



# 4-(Diethylphosphino-borane)-1-(4-anisyl)-1H-1,2,3-triazole (2c)

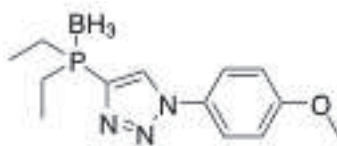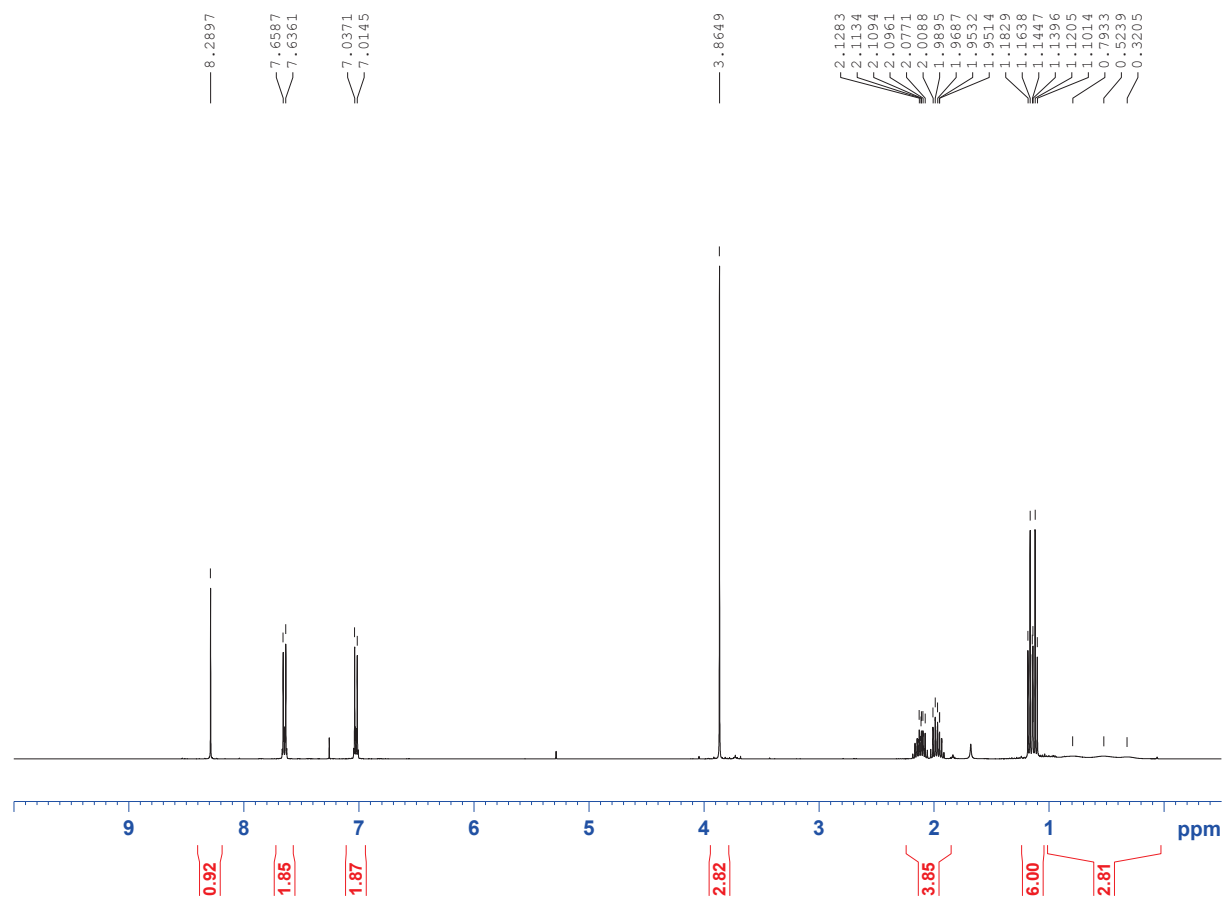

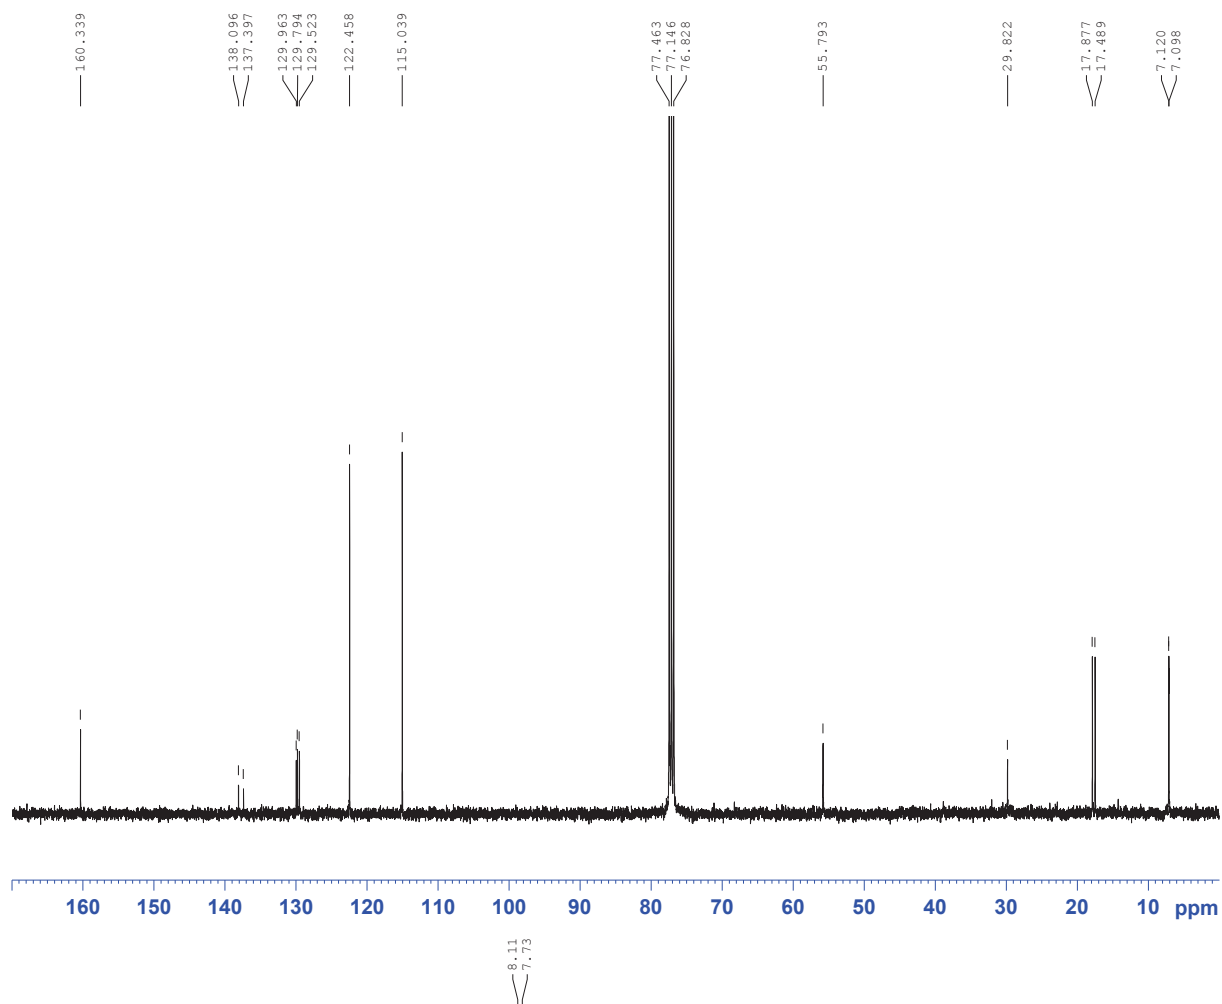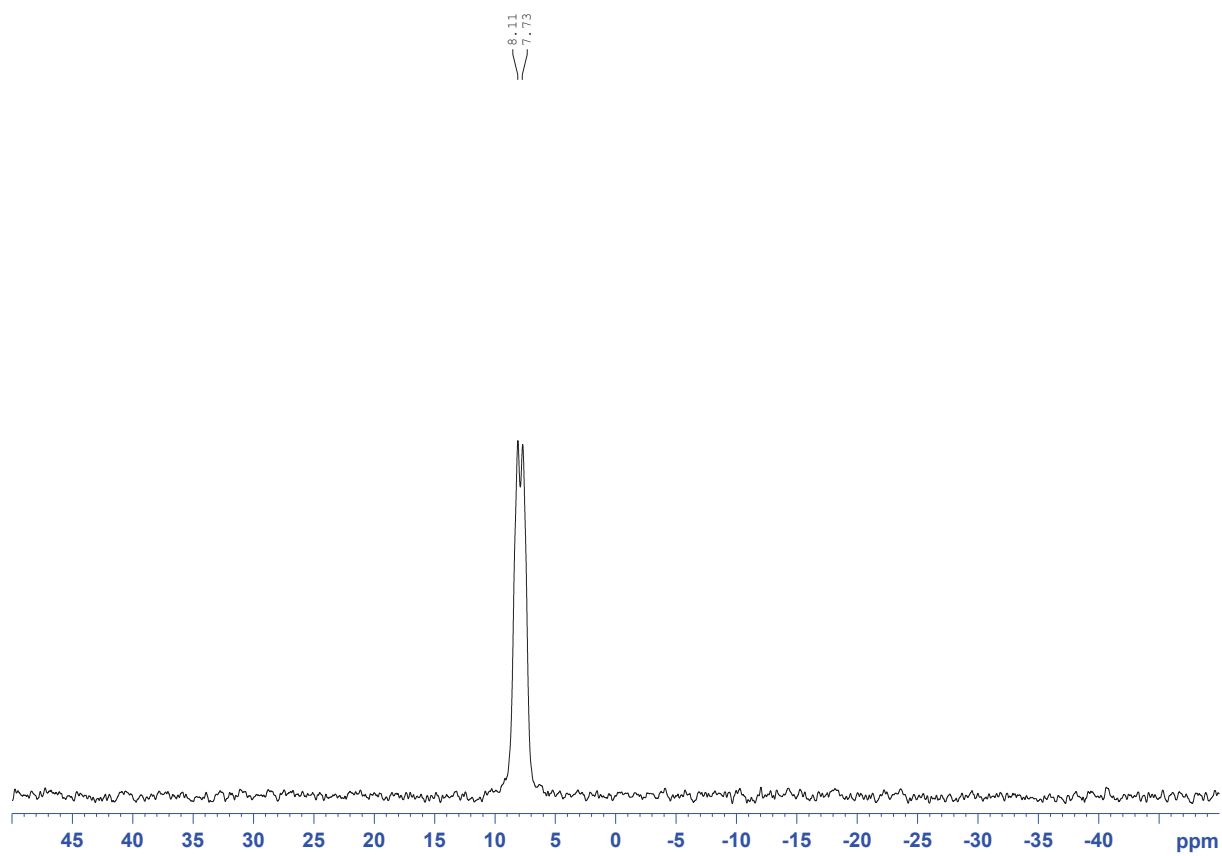

# 1-(4-Bromophenyl)-4-(diethylphosphino-borane)-1H-1,2,3-triazole (2d)

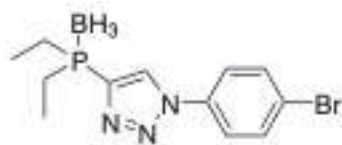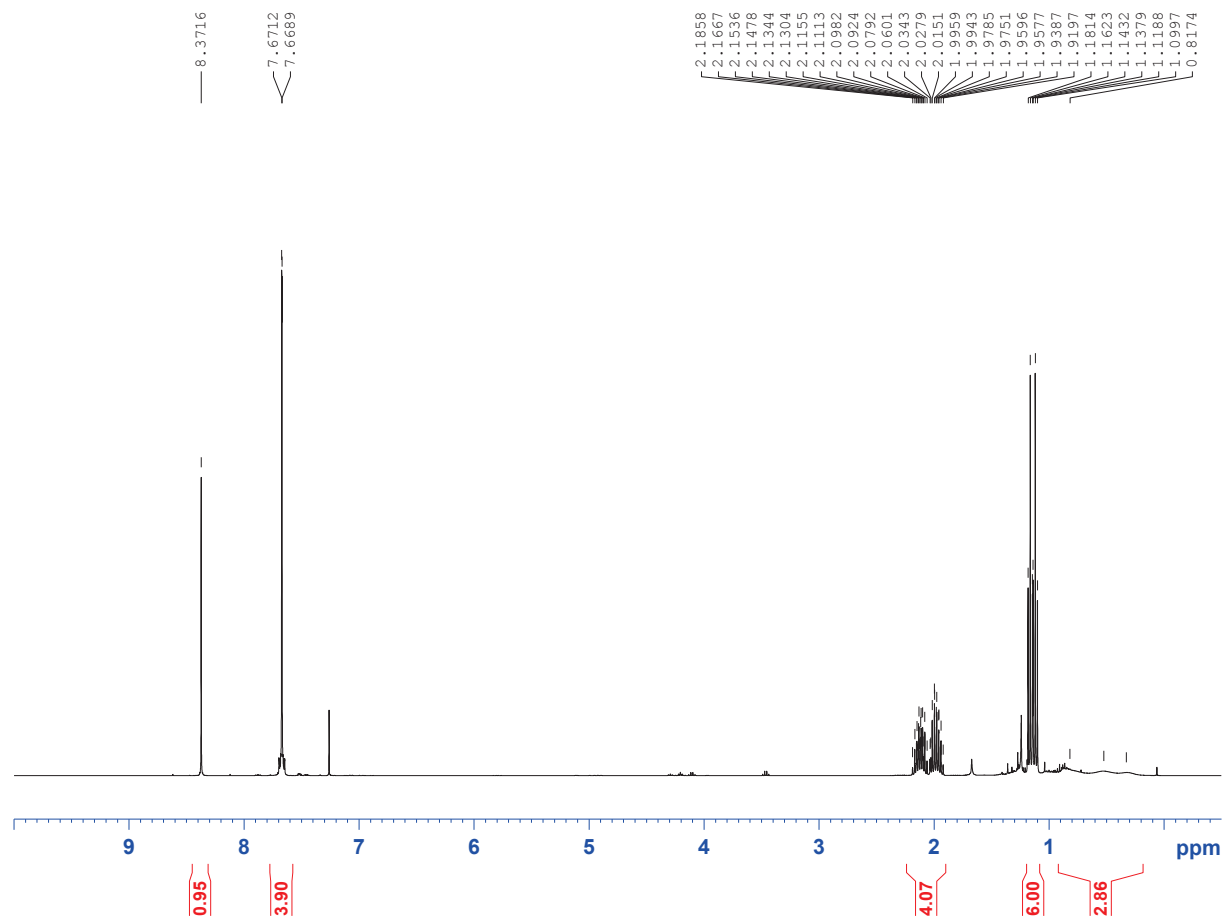

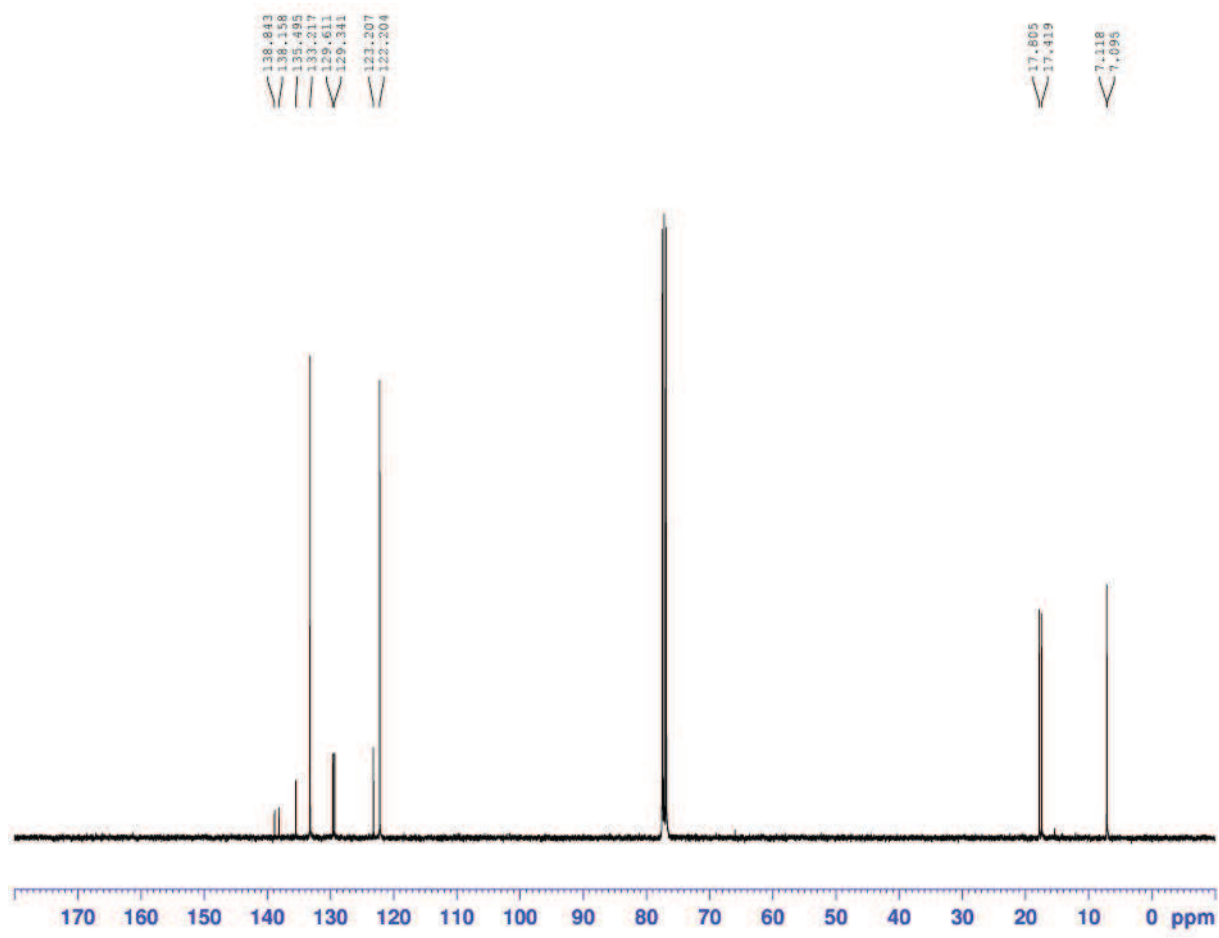

8.65  
8.23

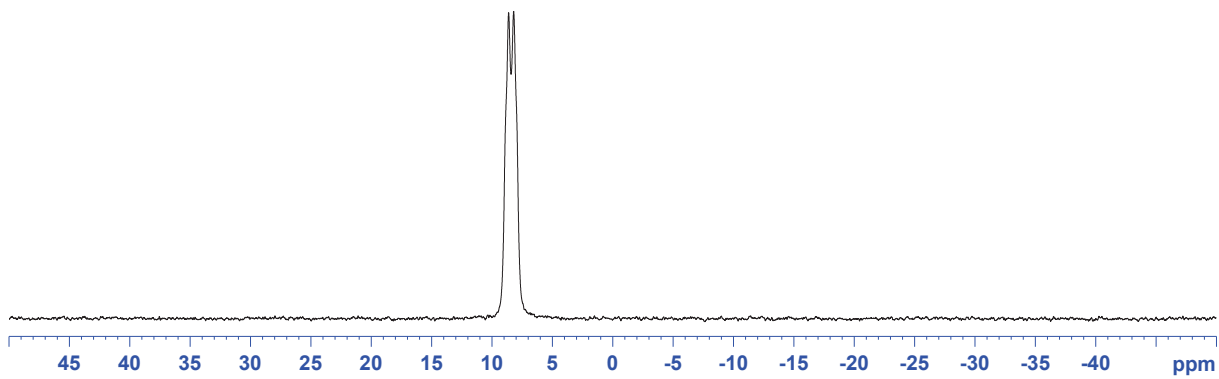

# 4-(Diethylphosphino-borane)-1-(4-trifluoromethylphenyl)-1H-1,2,3-triazole (2e)

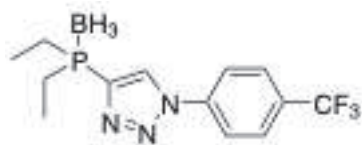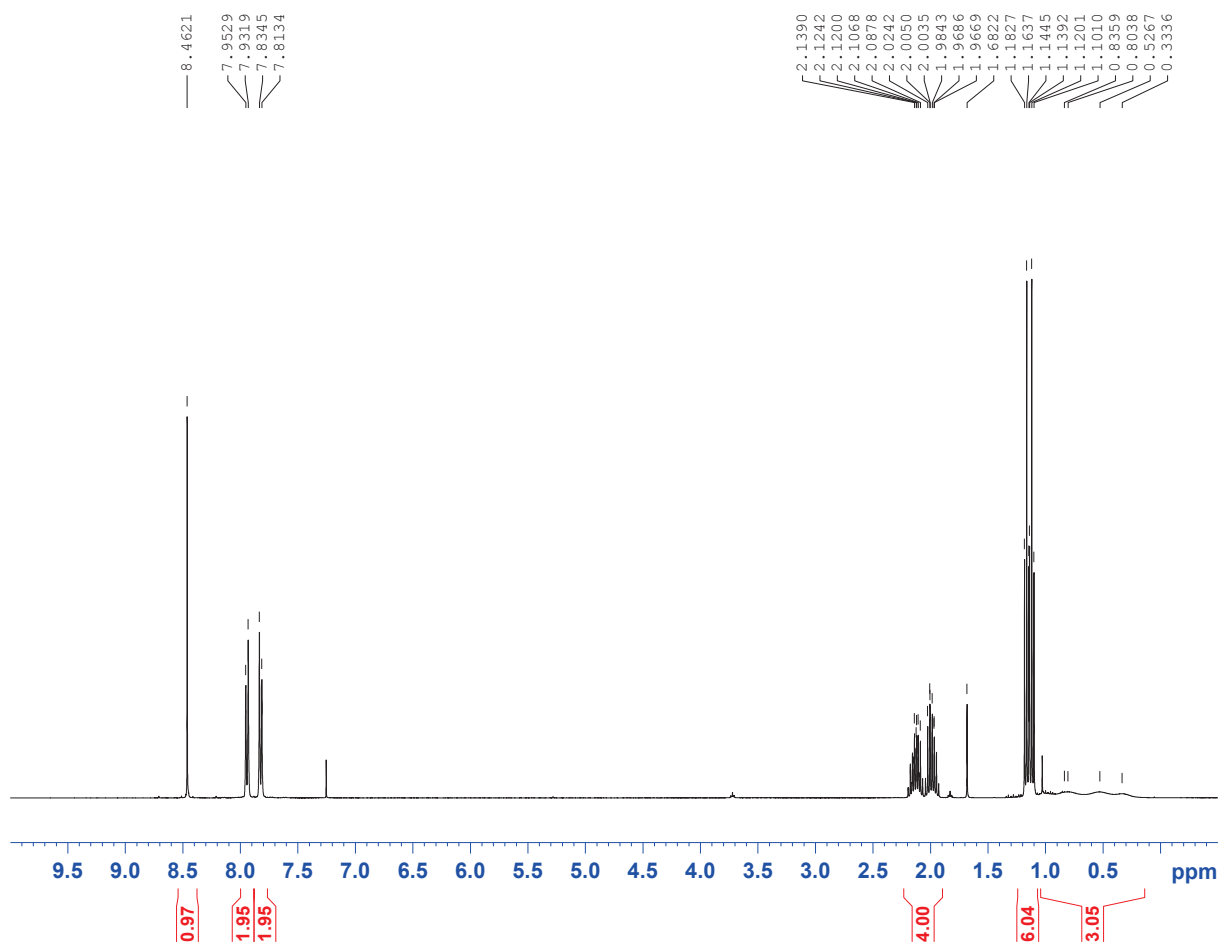

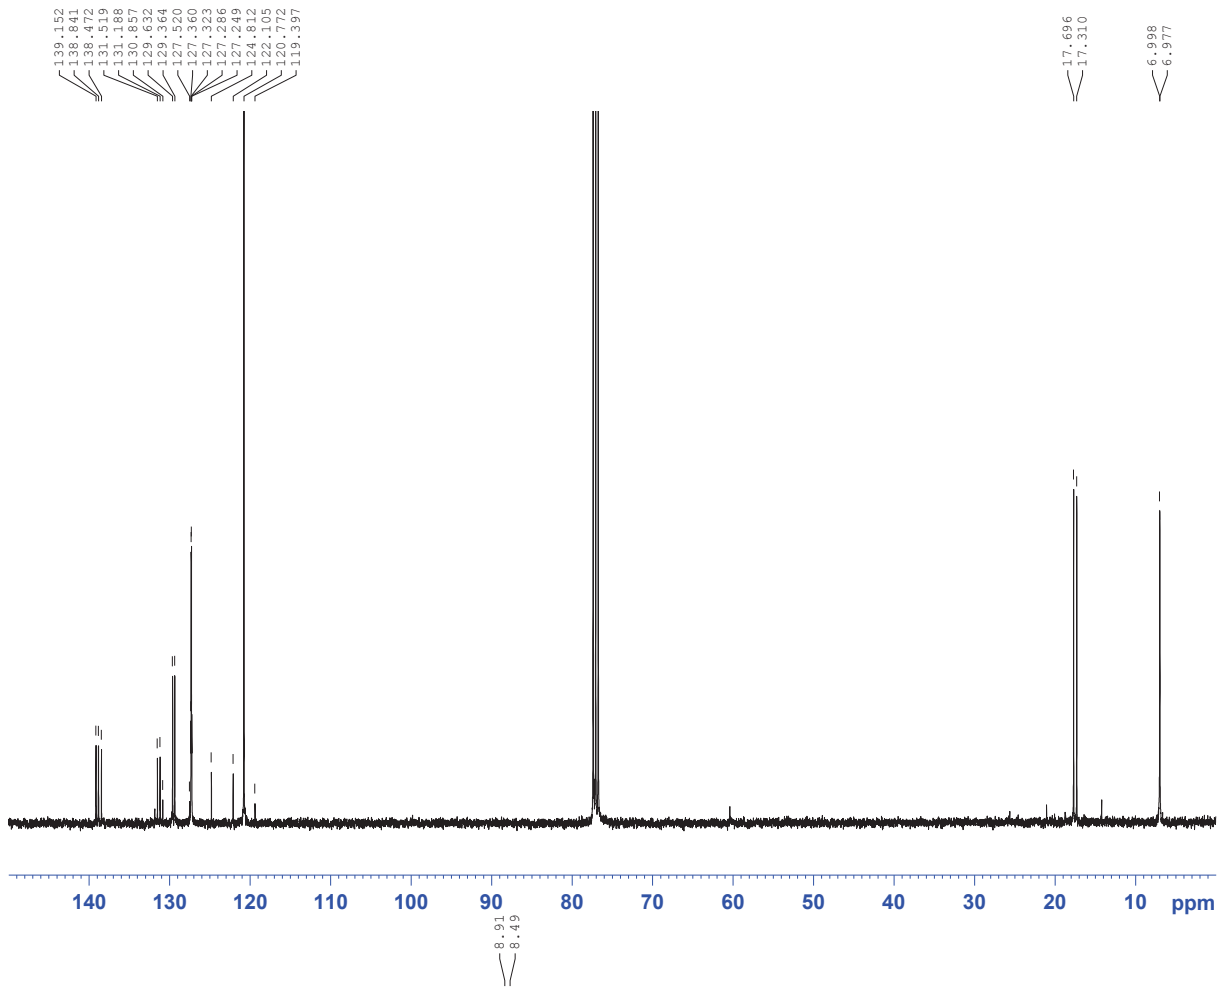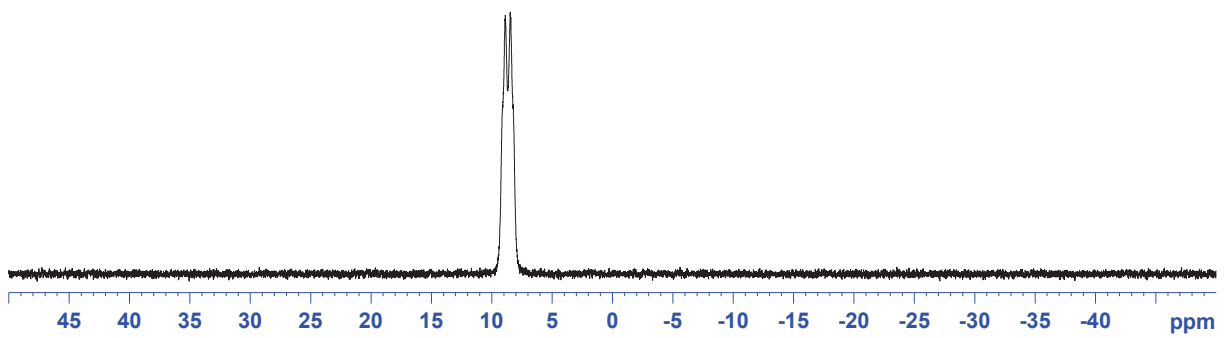

# 1-Benzyl-4-(di-*tert*-butylphosphino-borane)-1*H*-1,2,3-triazole (2f)

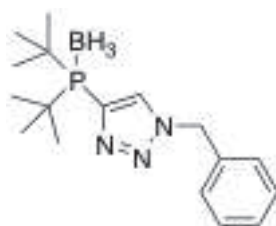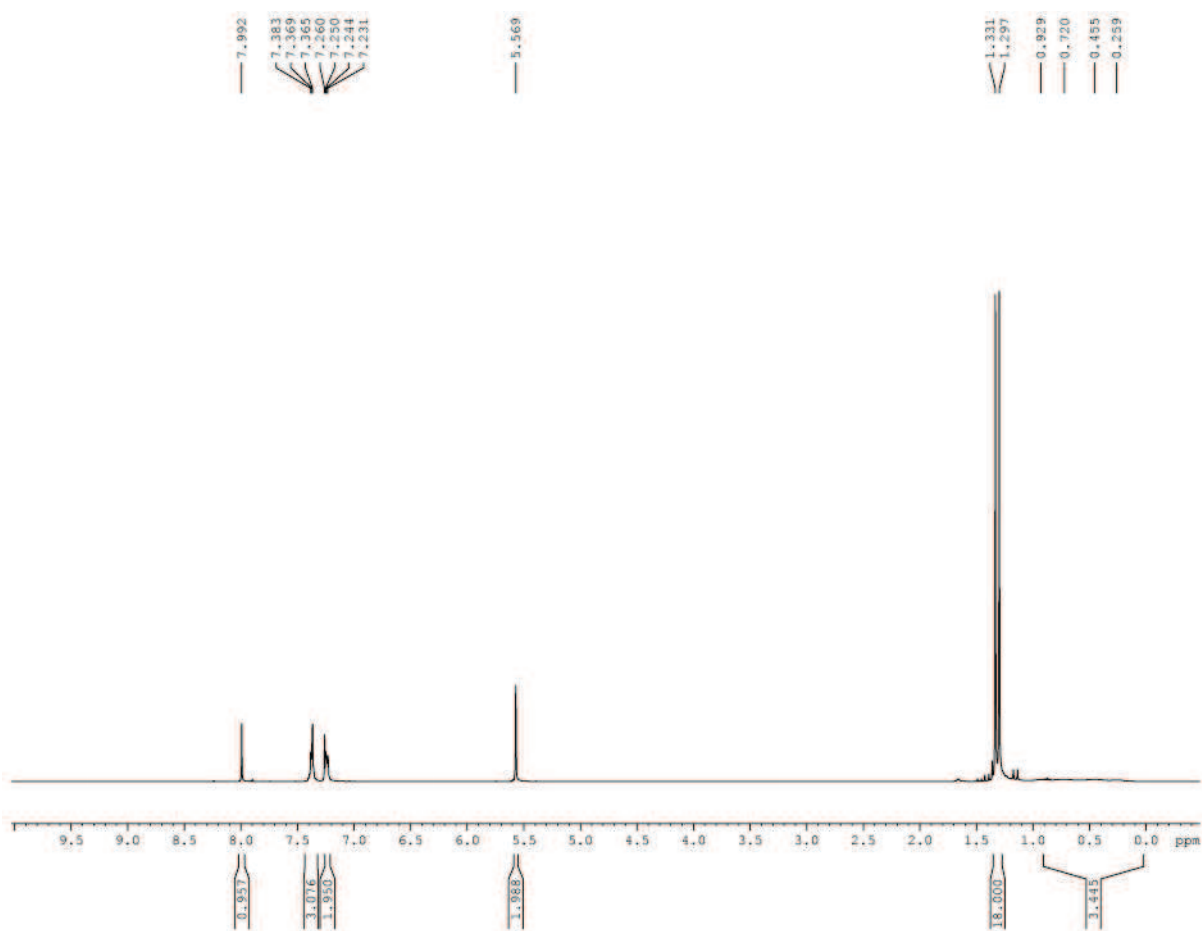

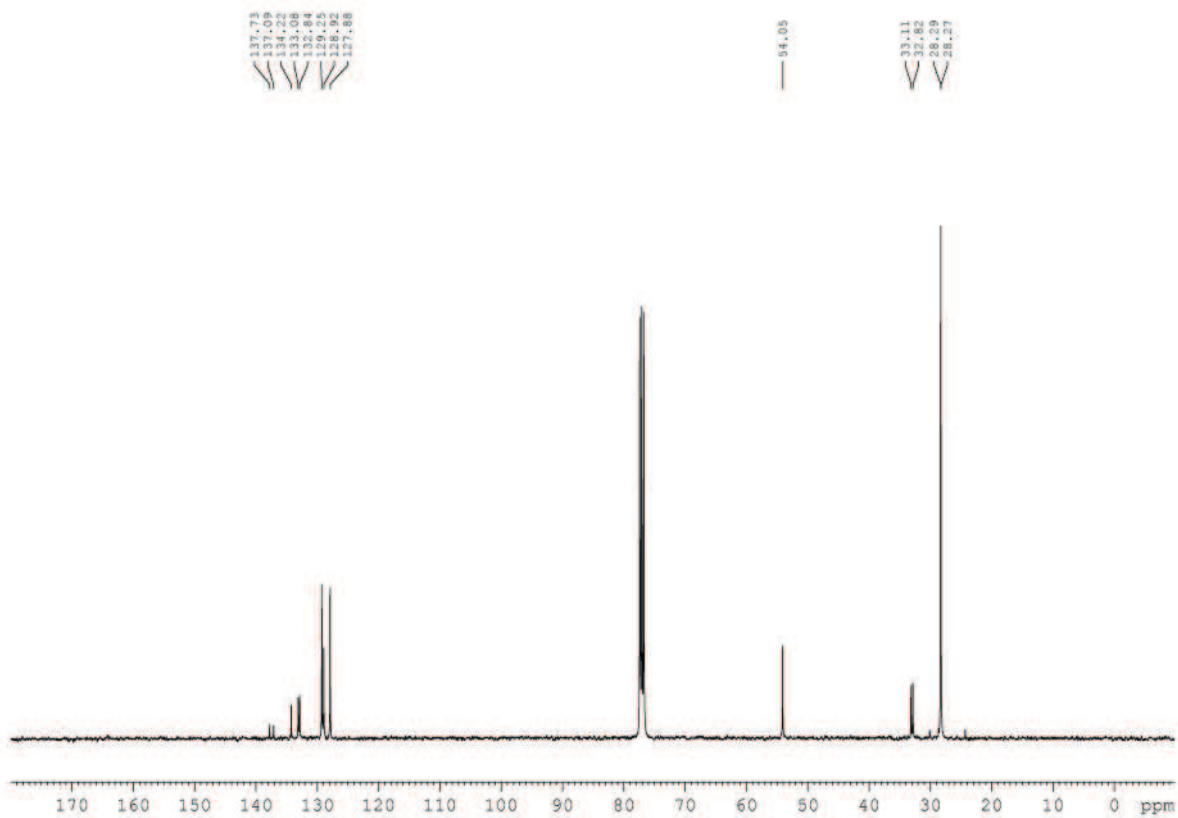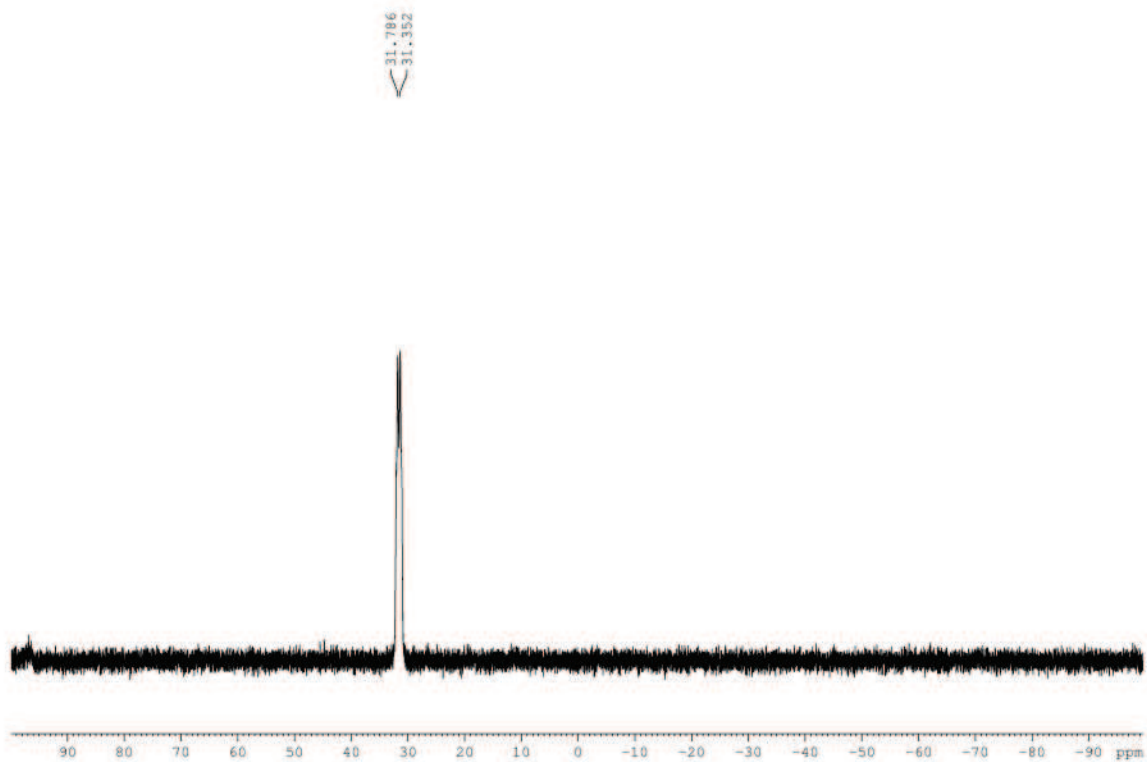



# 1-Benzyl-4-(methylphenylphosphino-borane)-1H-1,2,3-triazole (2g)

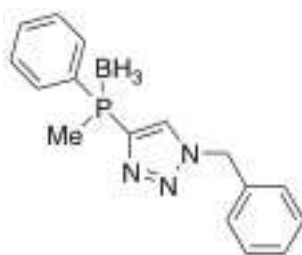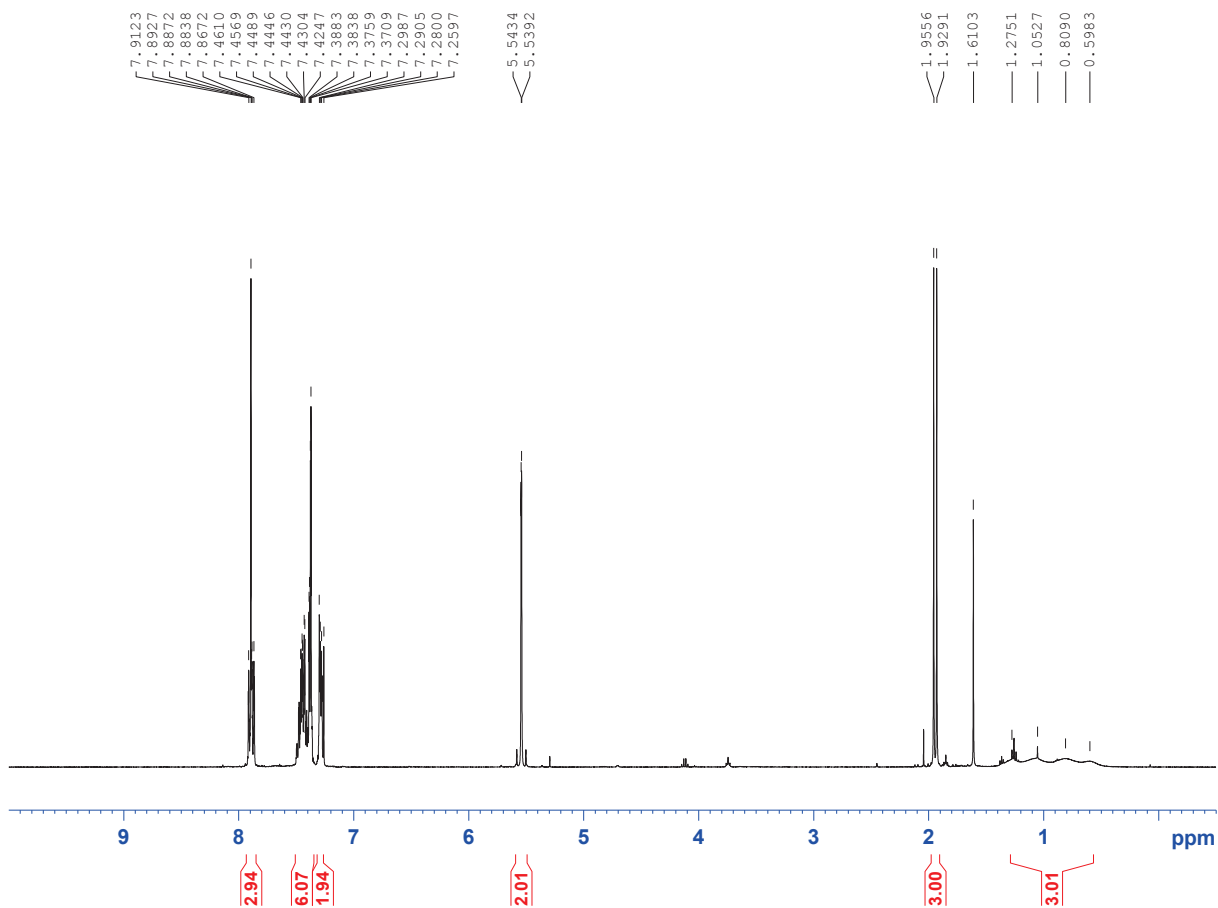

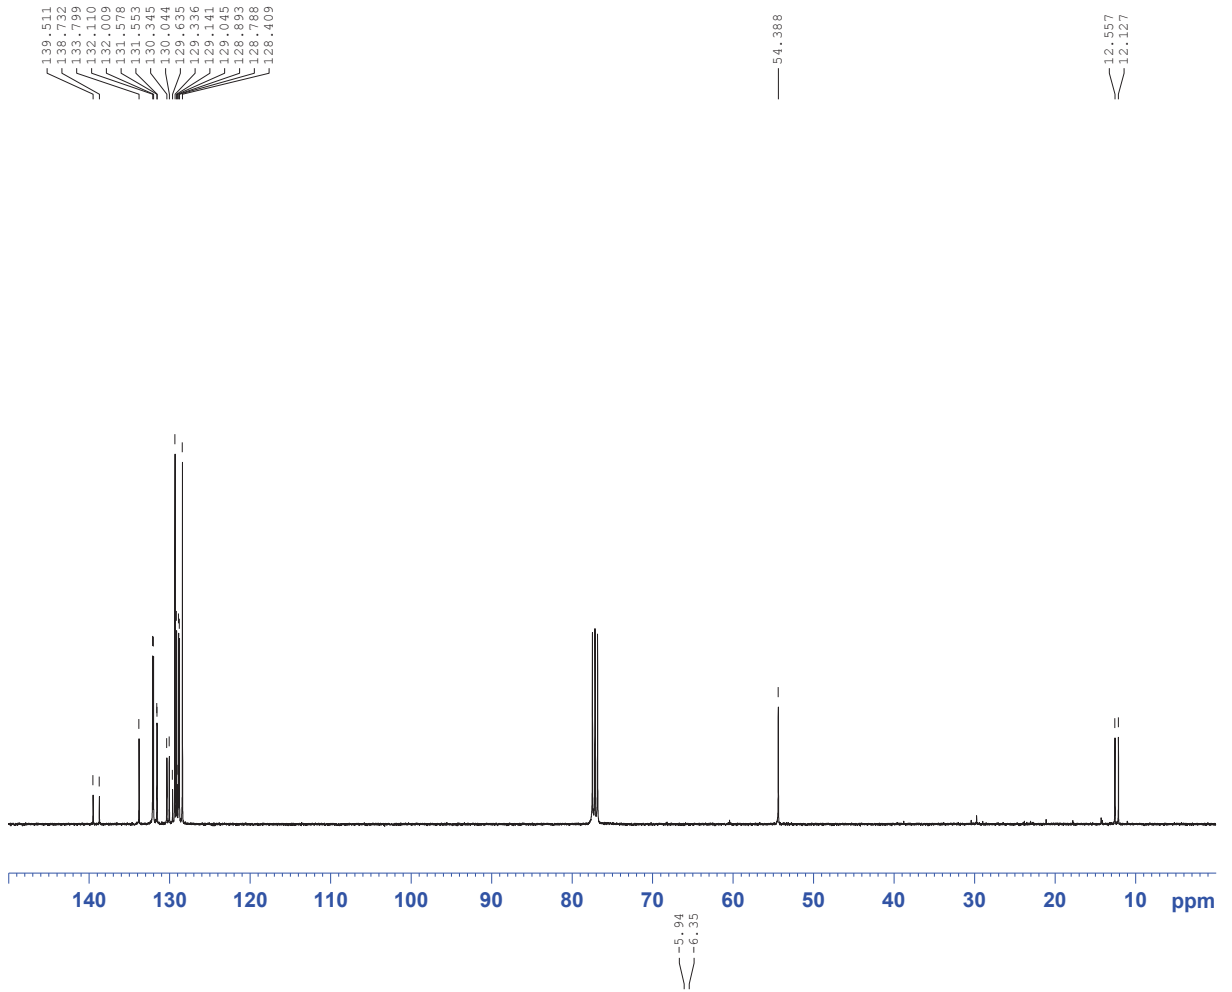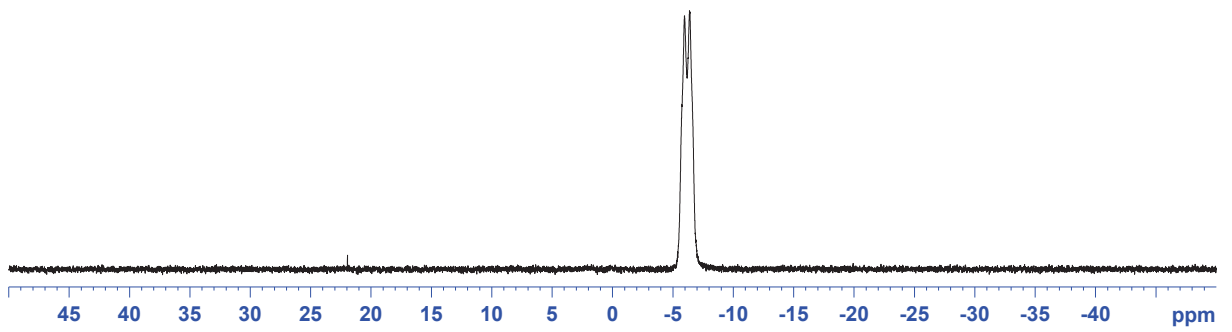

**1-(4-Bromophenyl)-4-(methylphenylphosphino-borane)-1*H*-1,2,3-triazole (2h)**

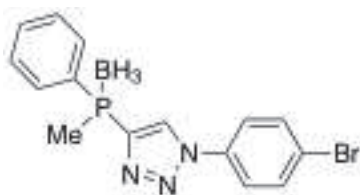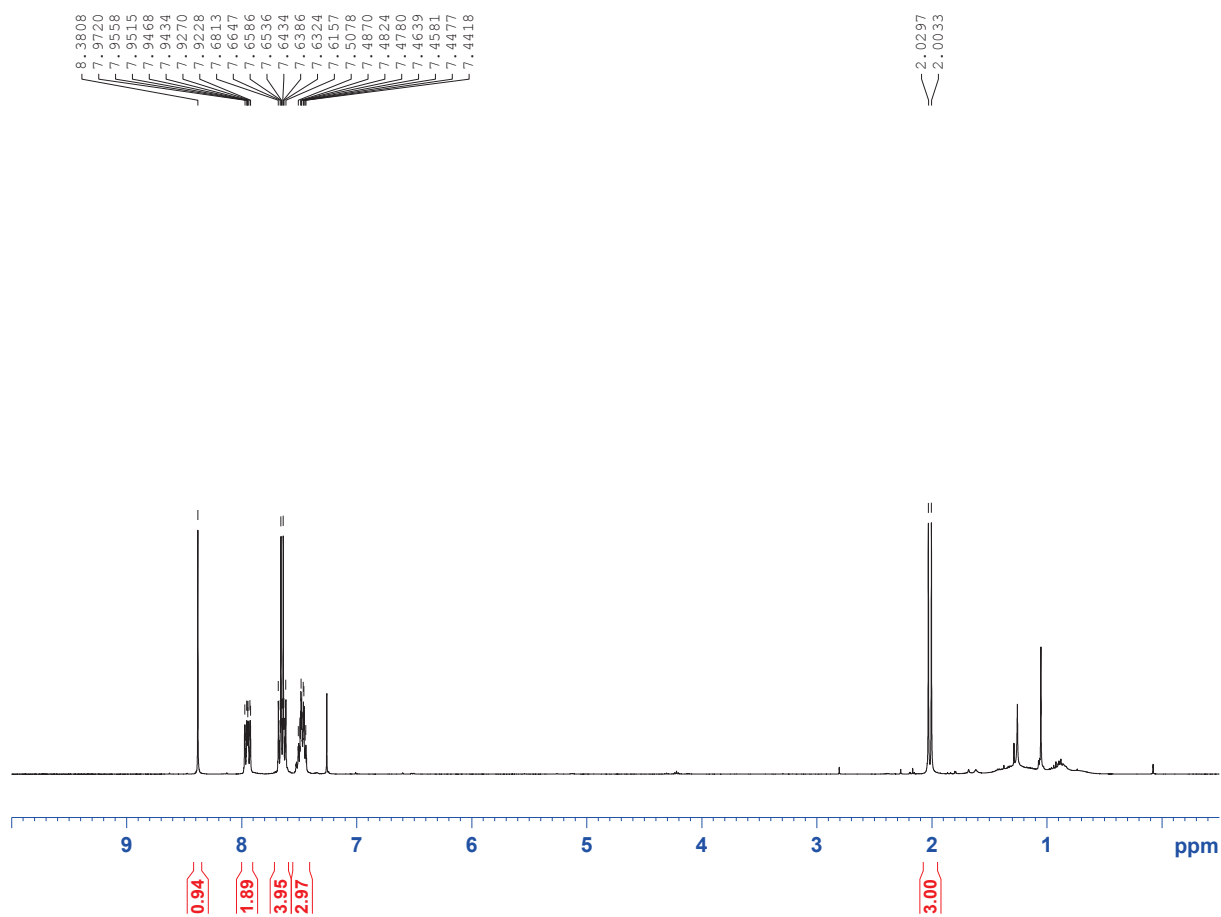

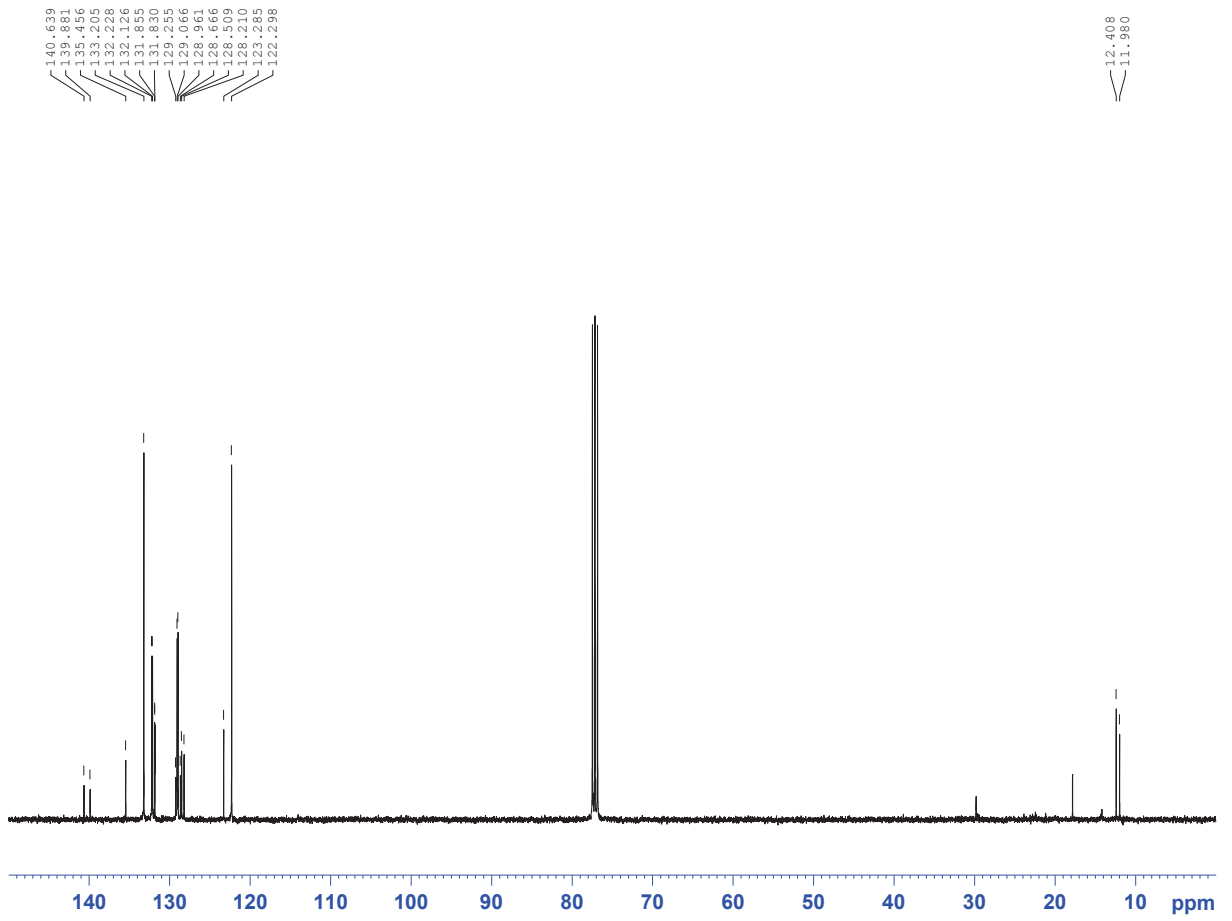

12.408  
11.980

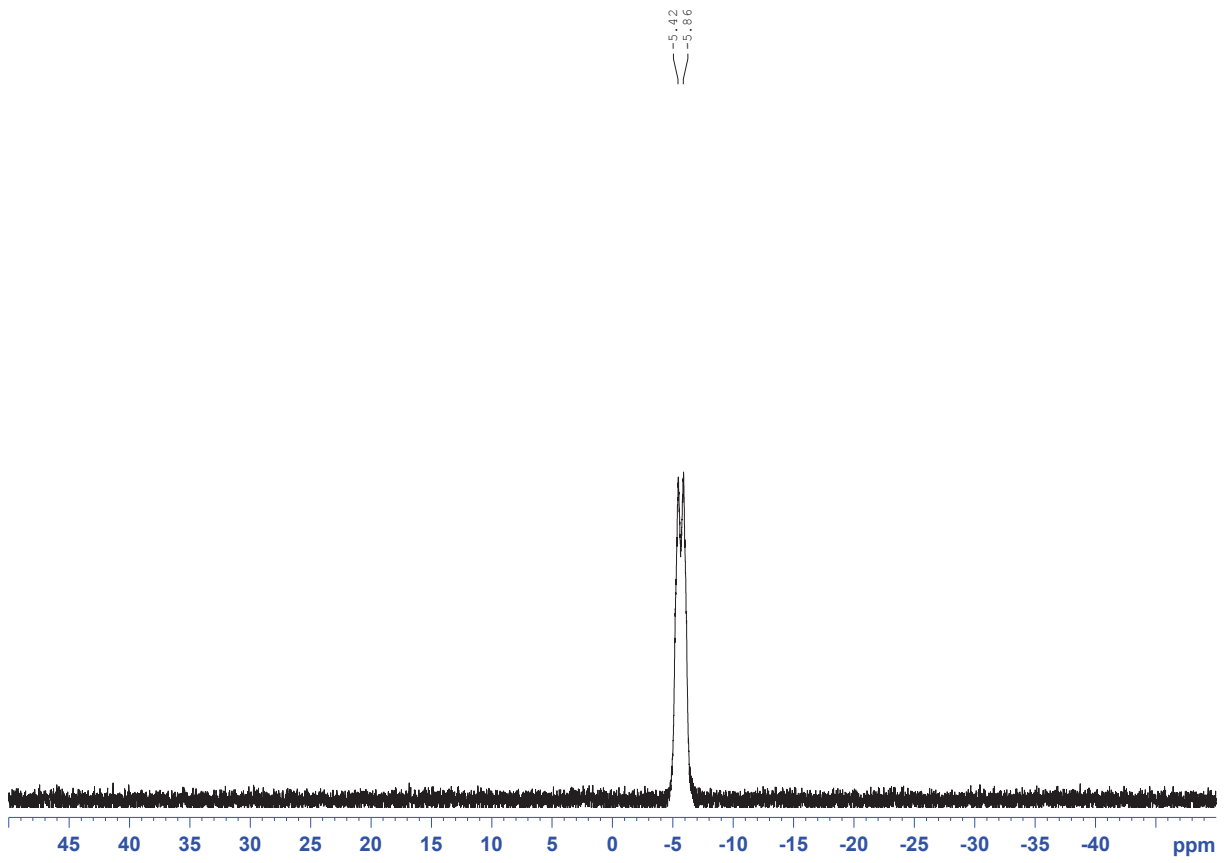

5.42  
5.86

1-Benzyl-4-(diphenylphosphino-borane)-1*H*-1,2,3-triazole (2i)

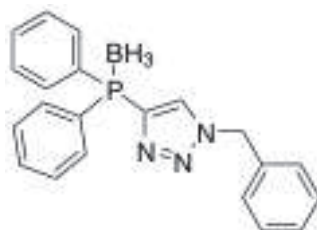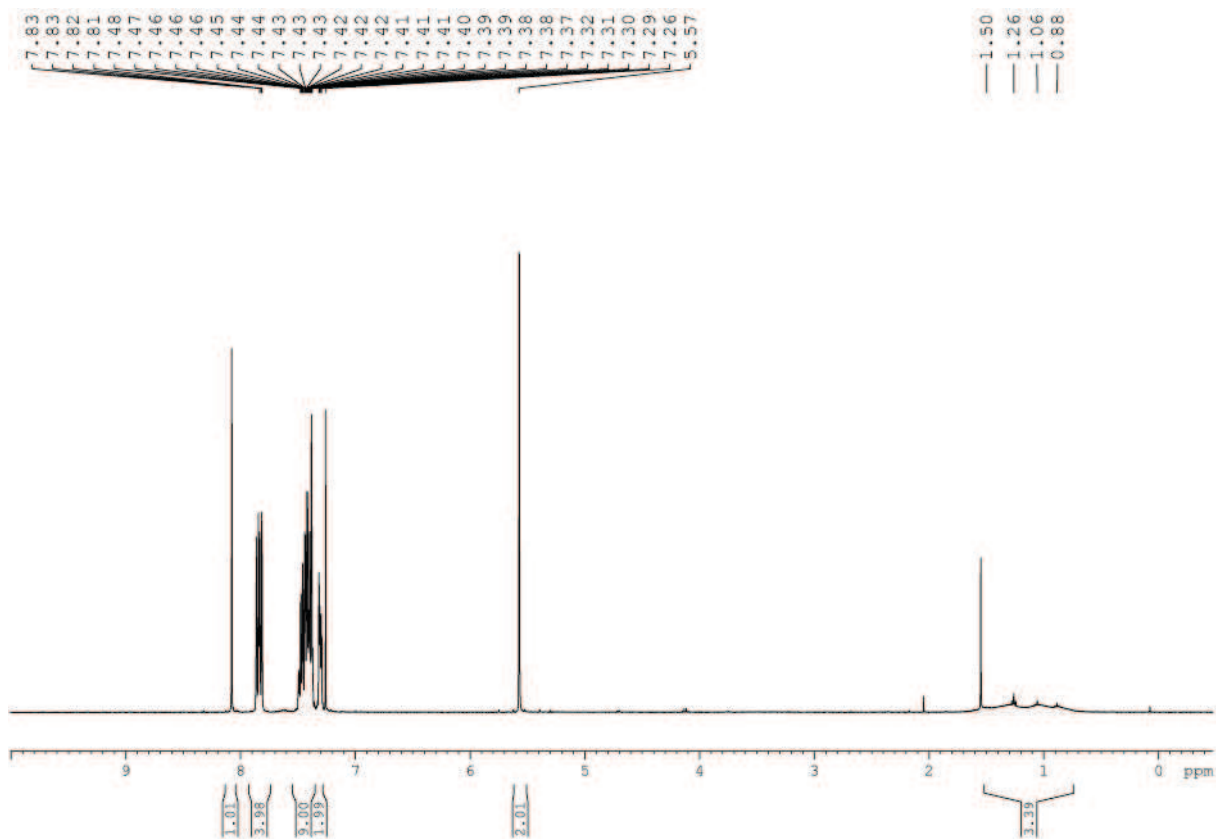

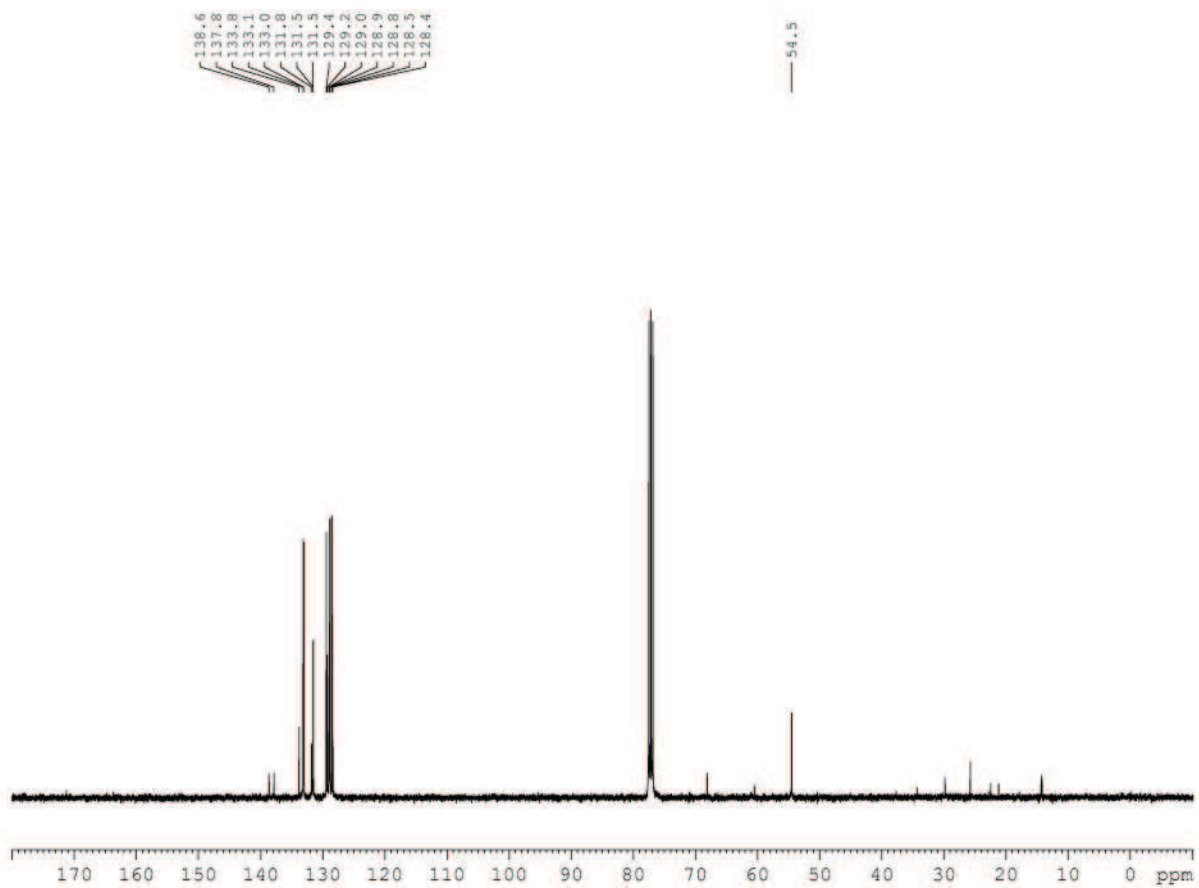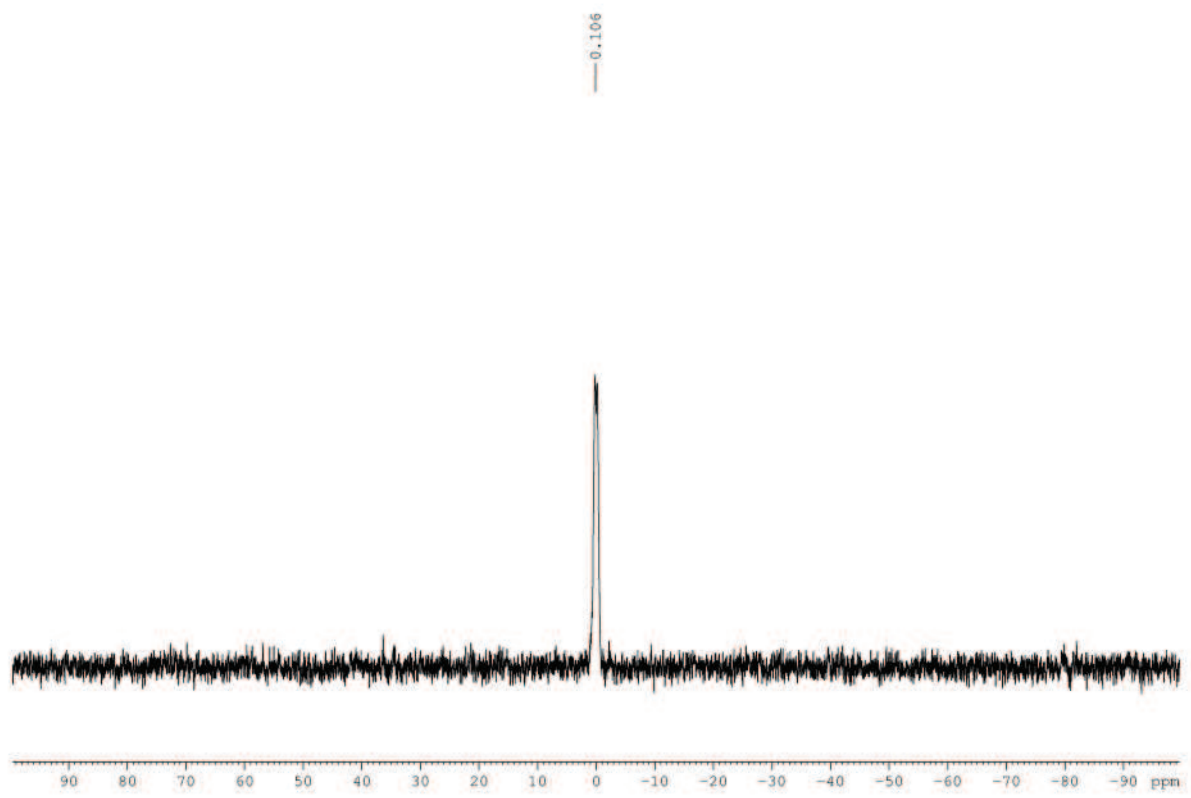

# 1-(4-Bromophenyl)-4-(diphenylphosphino-borane)-1H-1,2,3-triazole (2j)

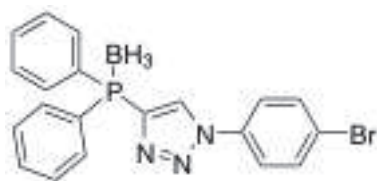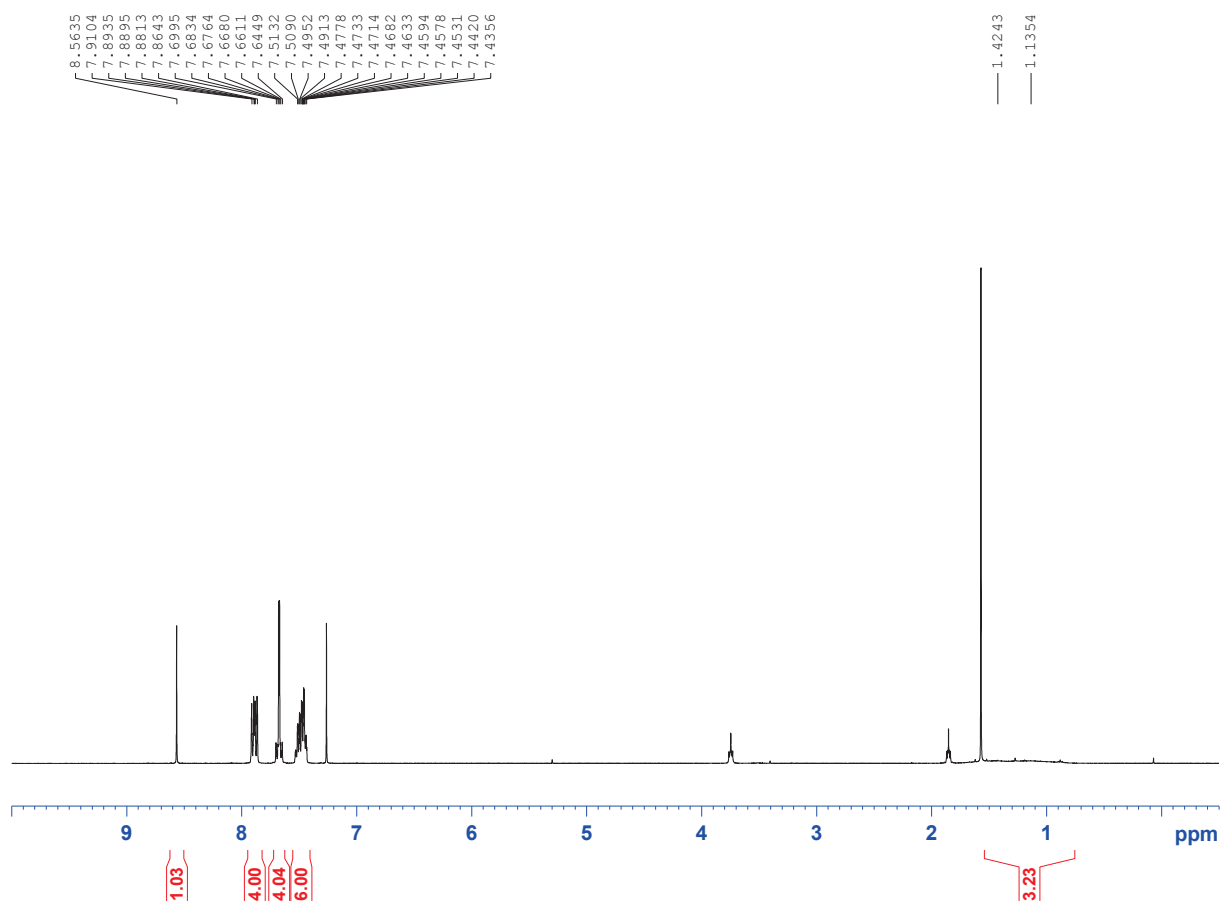

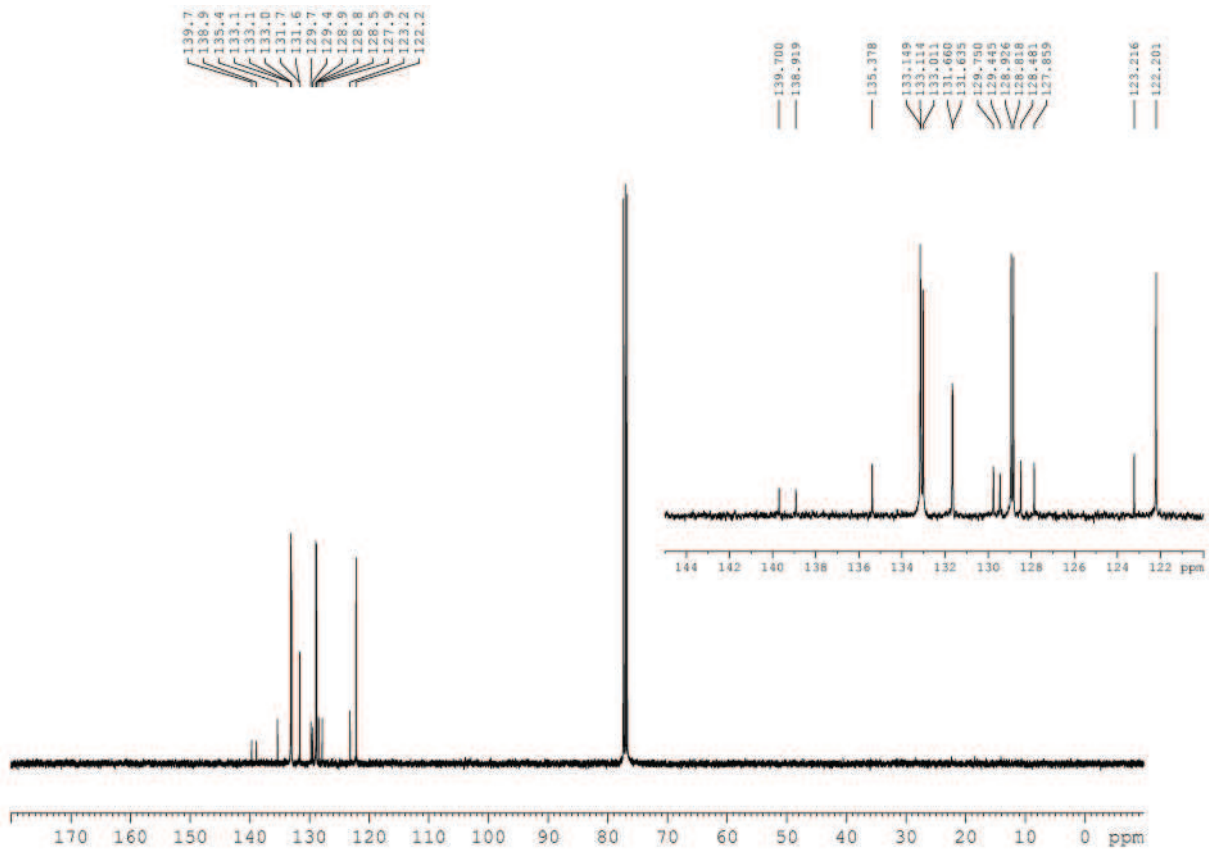

0.73  
0.42

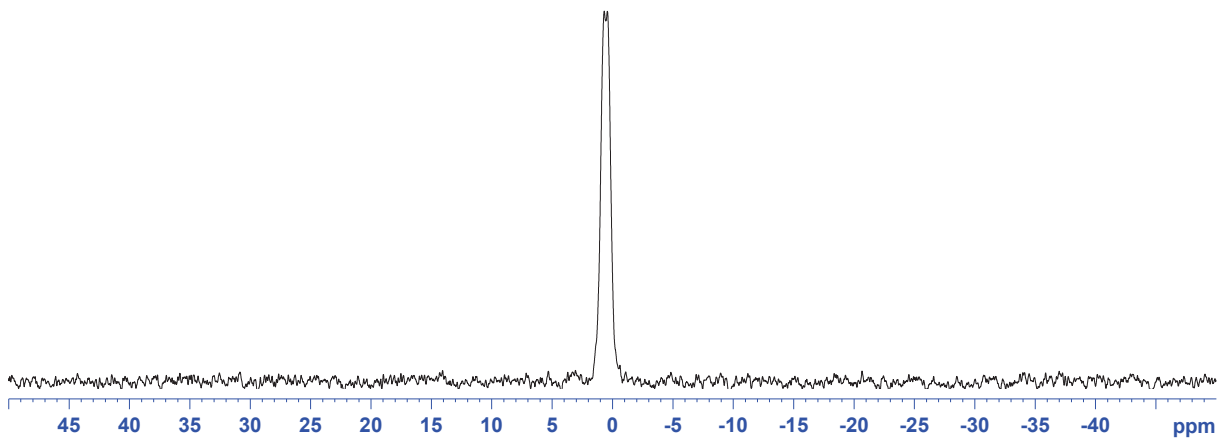



1-(4-Trifluoromethylphenyl)-4-(diphenylphosphino-borane)-1H-1,2,3-triazole (2k)

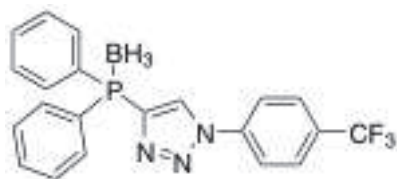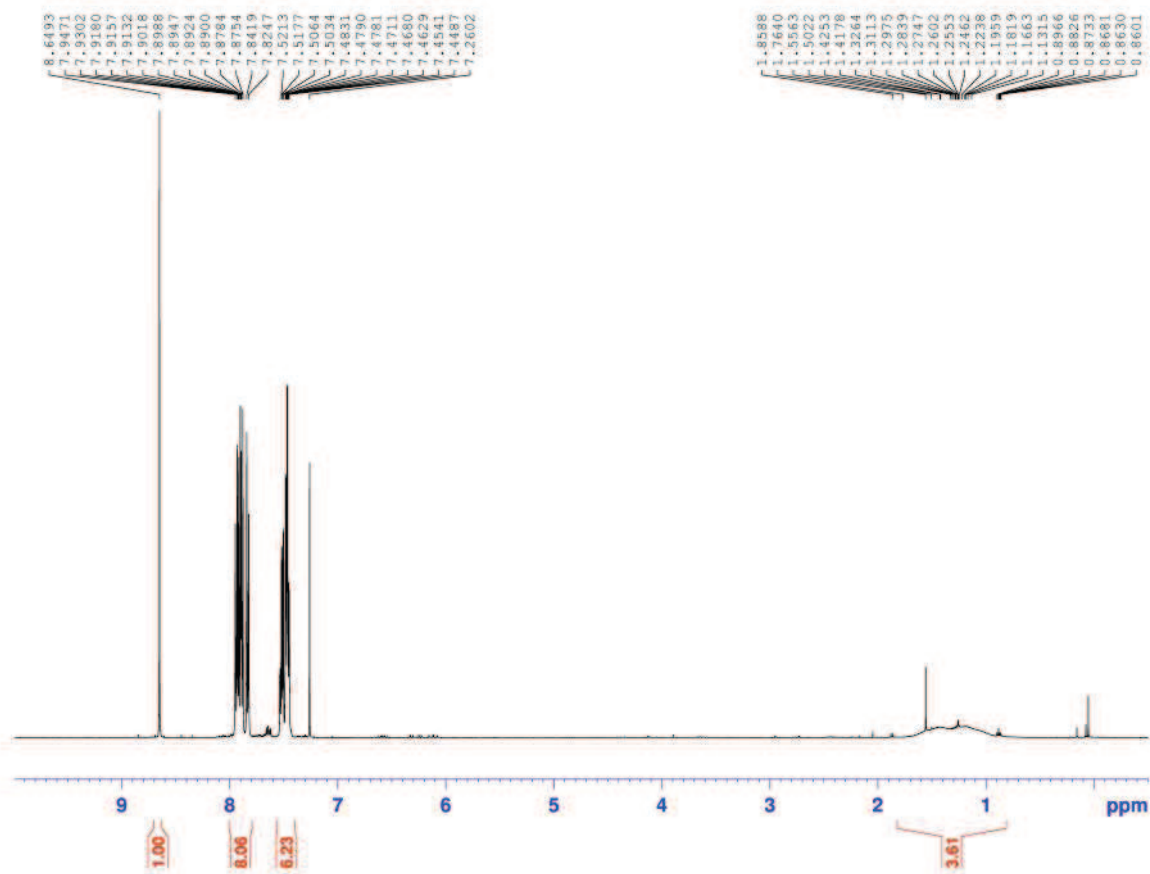



# 4-(Diethylphosphino-borane)-1-(phenylthiomethyl)-1H-1,2,3-triazole (2l)

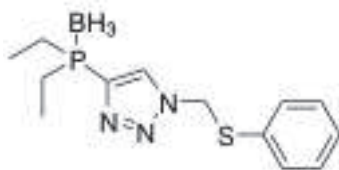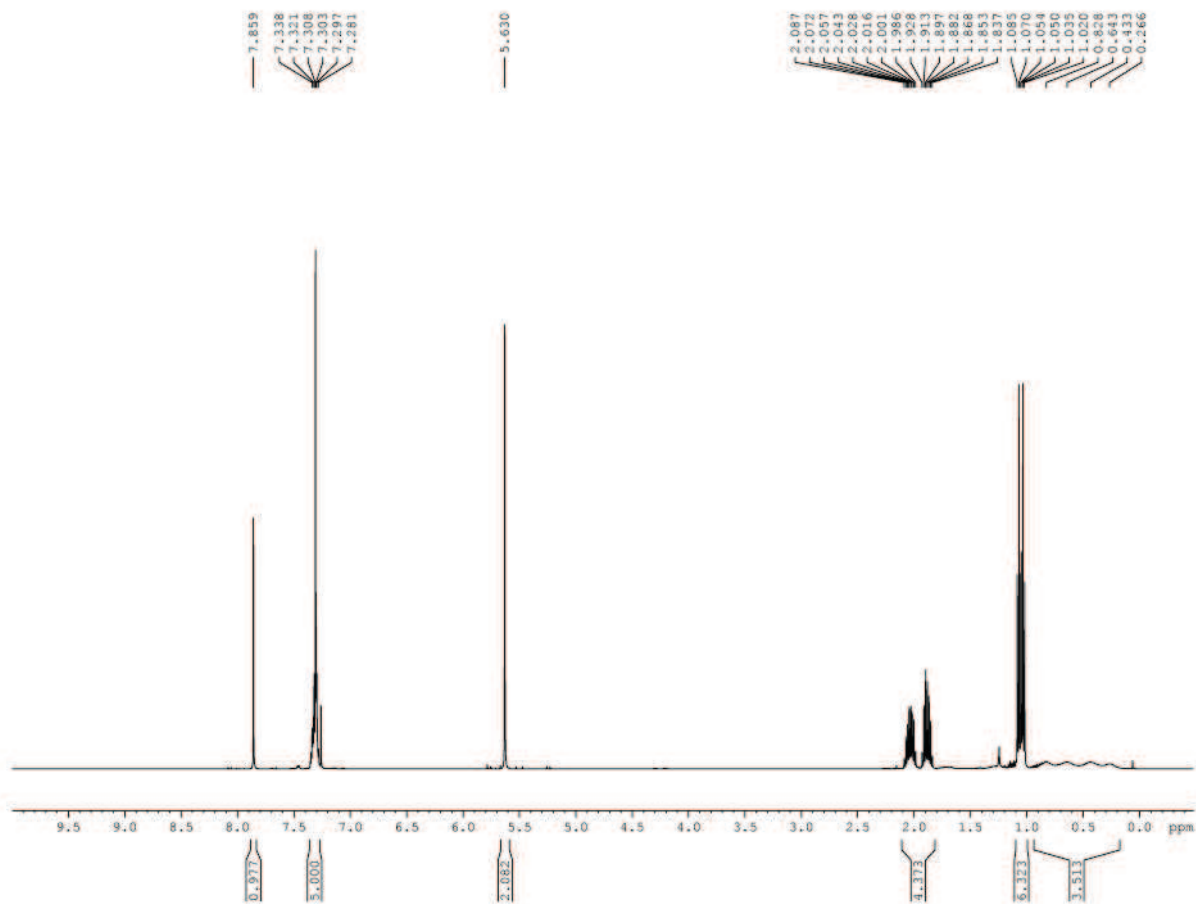

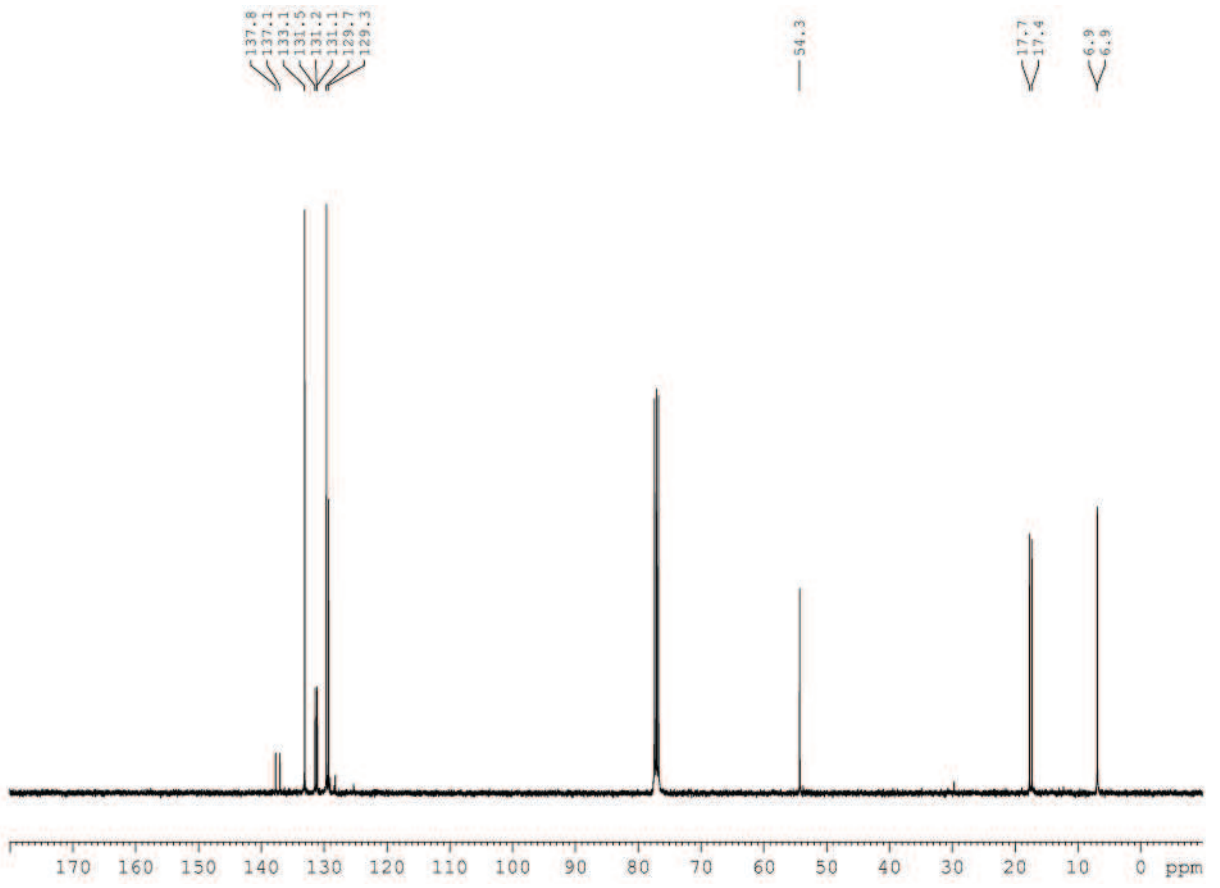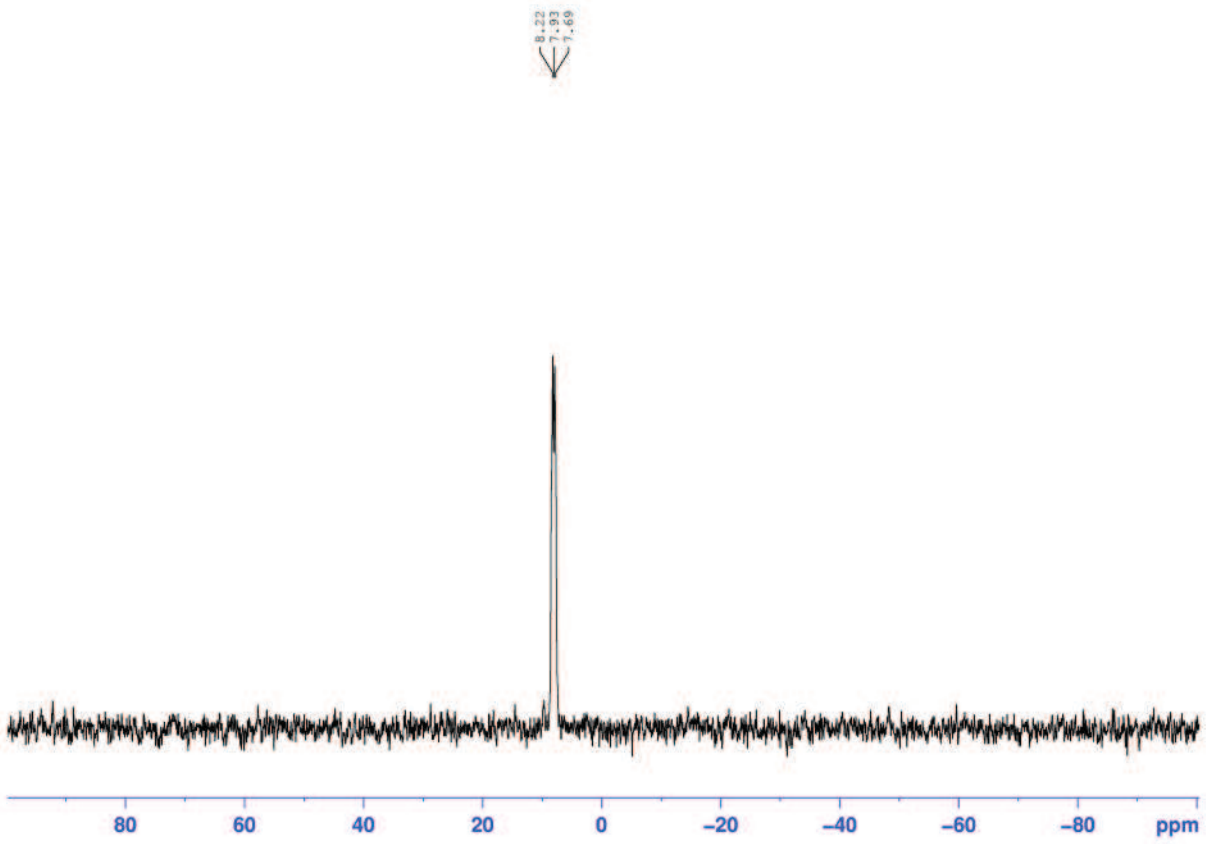

**4-(Diethylphosphino-borane)-1-(2,3,4-tri-O-acetyl- $\beta$ -D-xylopyranosyl)-1*H*-1,2,3-triazole (2m)**

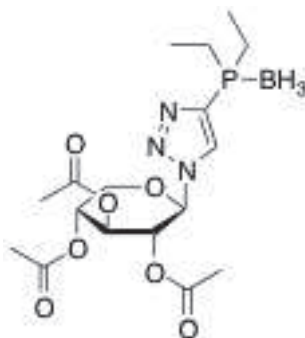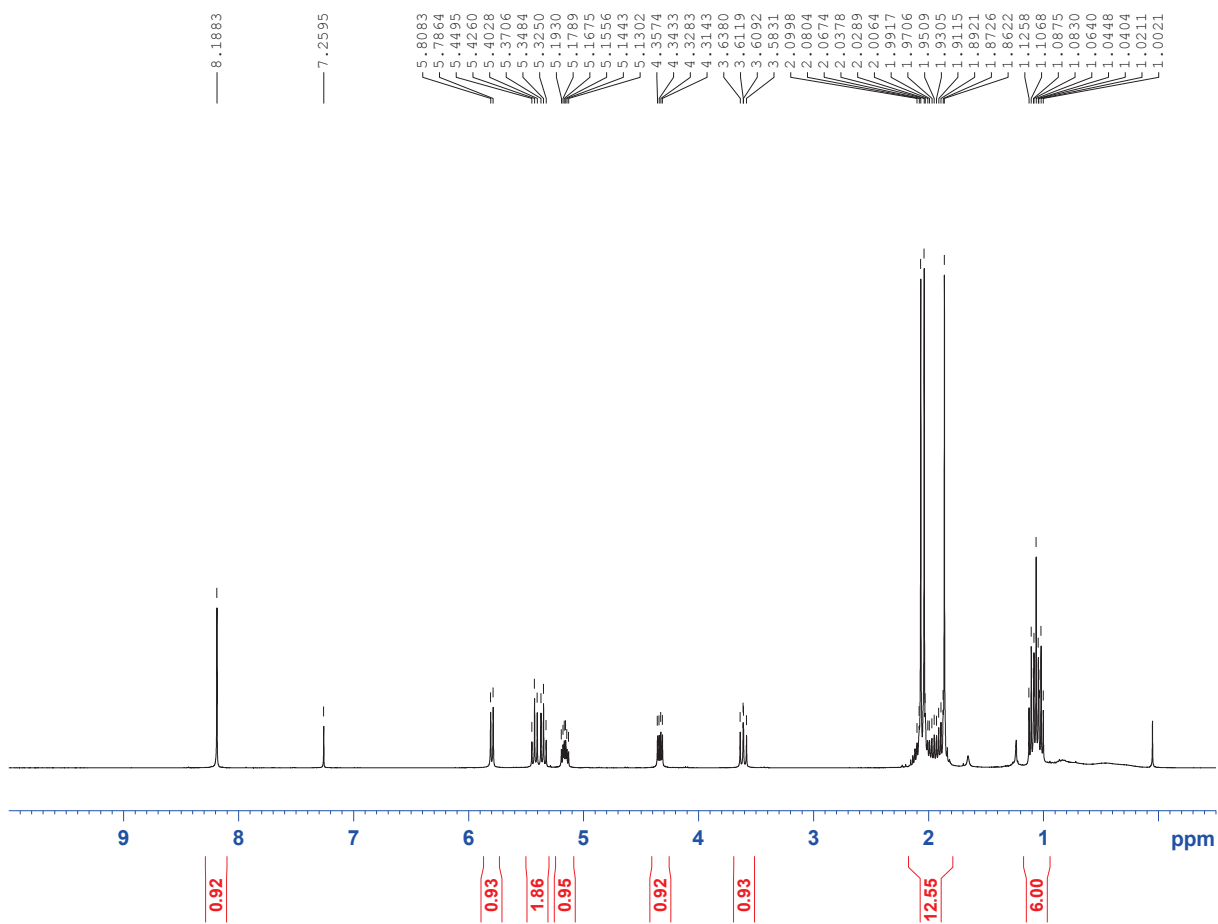

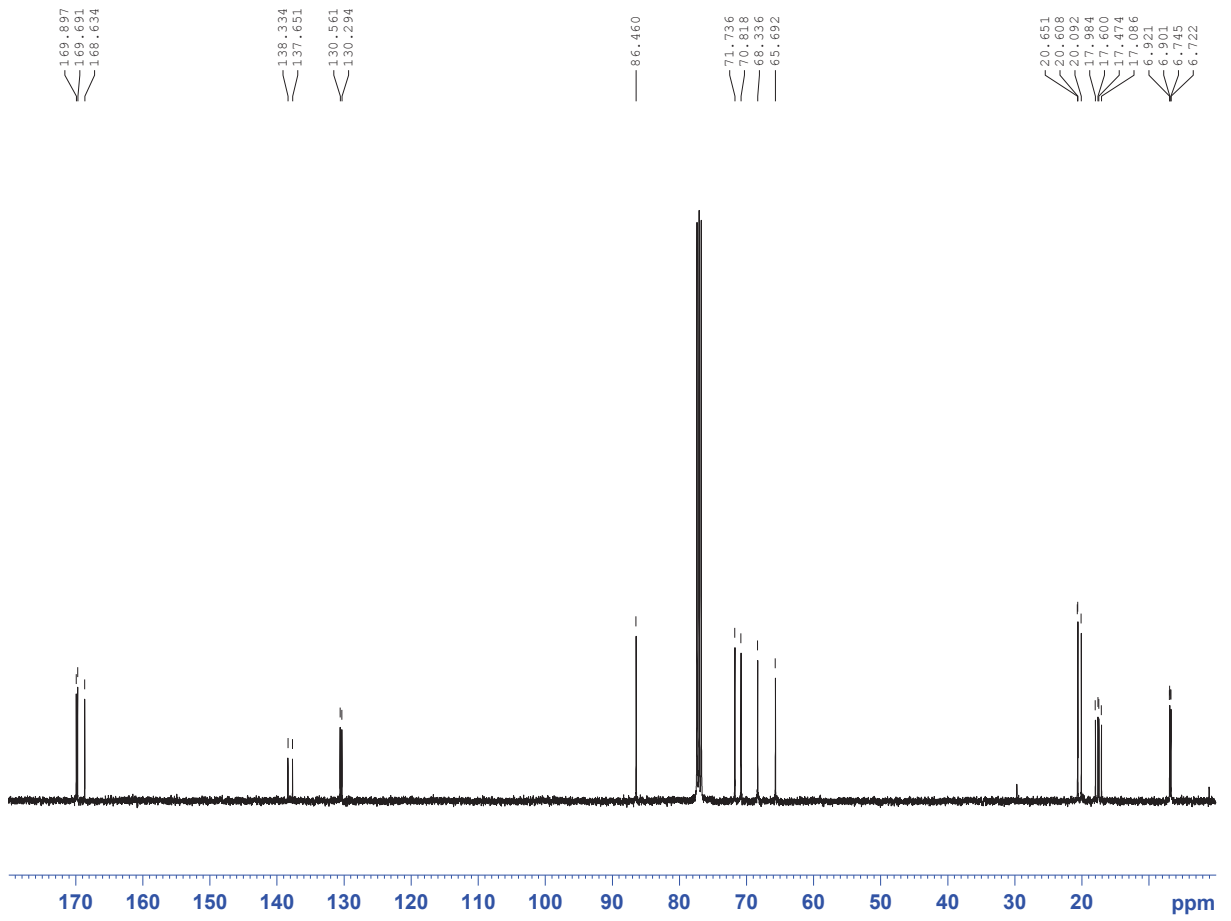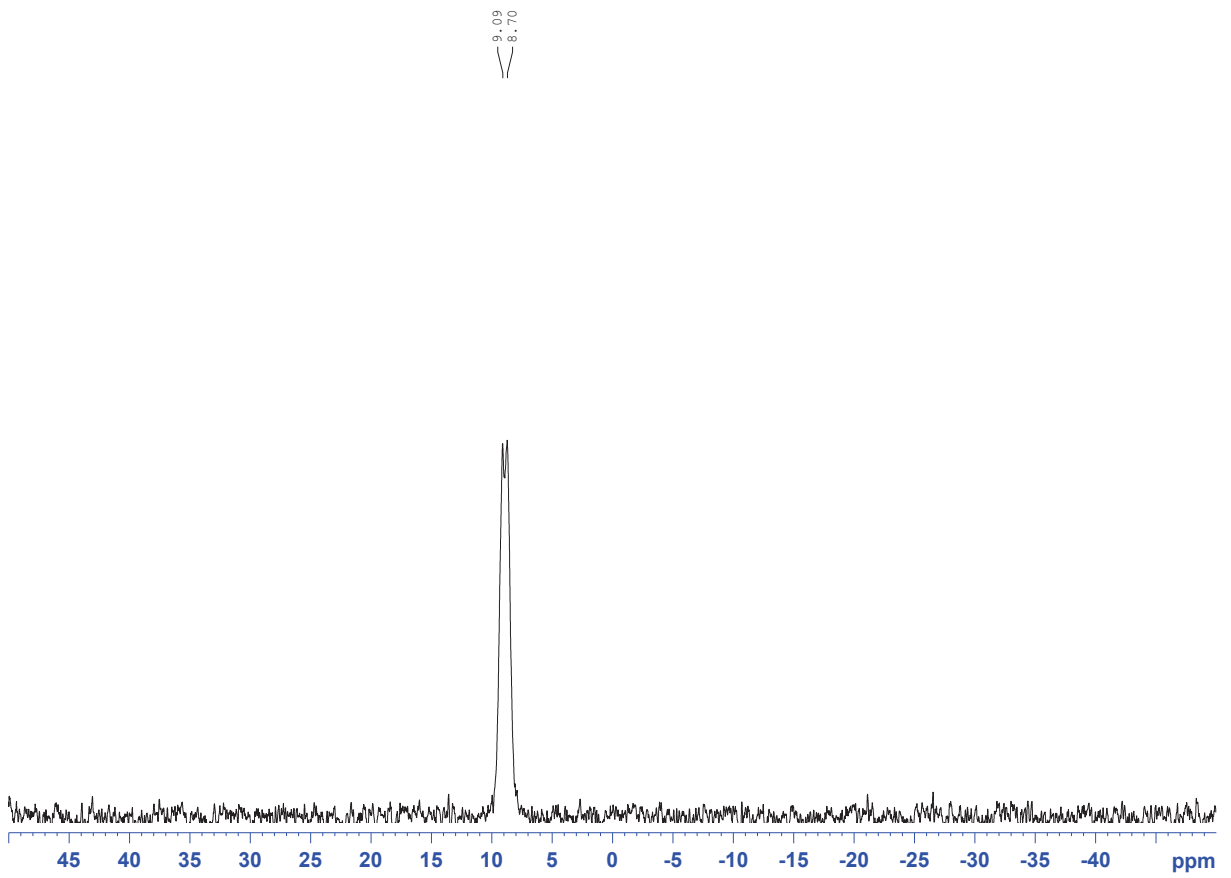

4-(Diethylphosphino-borane)-1-([2.2]-paracyclophan-4-yl)-1*H*-1,2,3-triazole (2n)

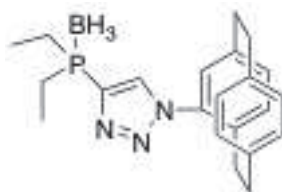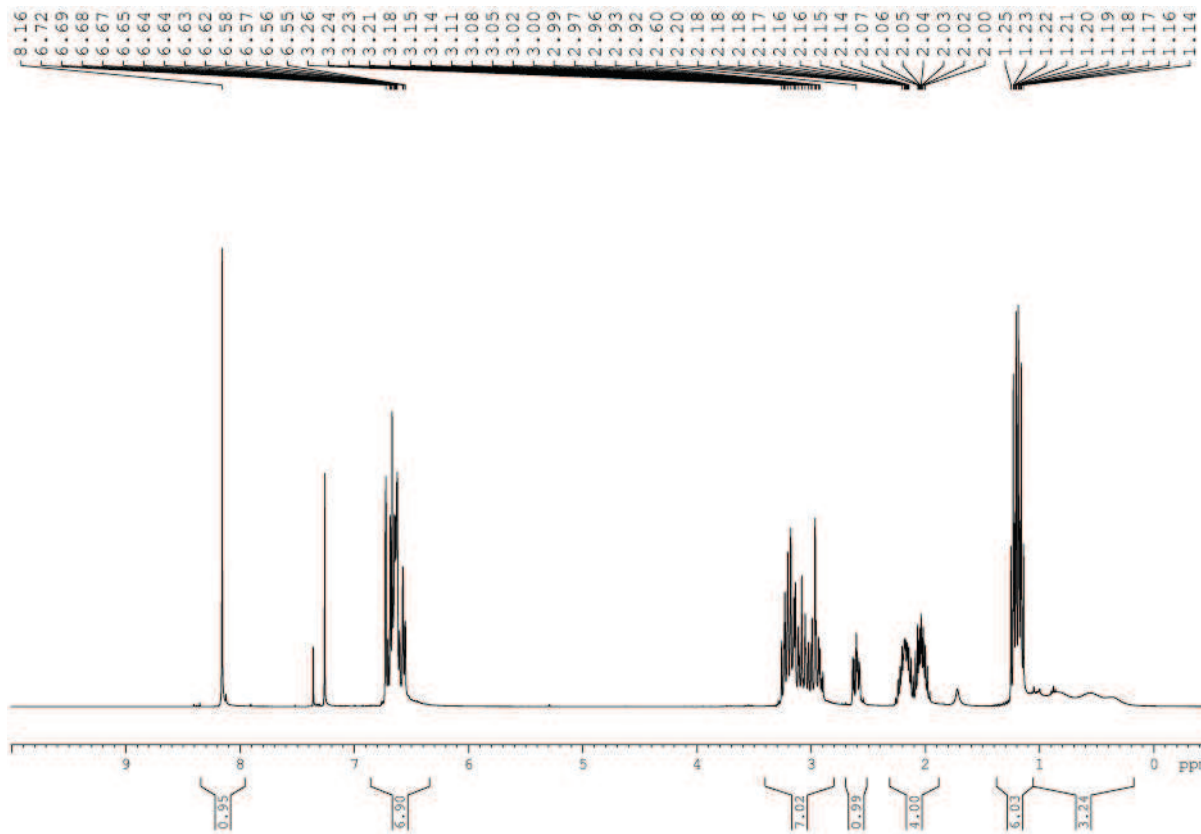

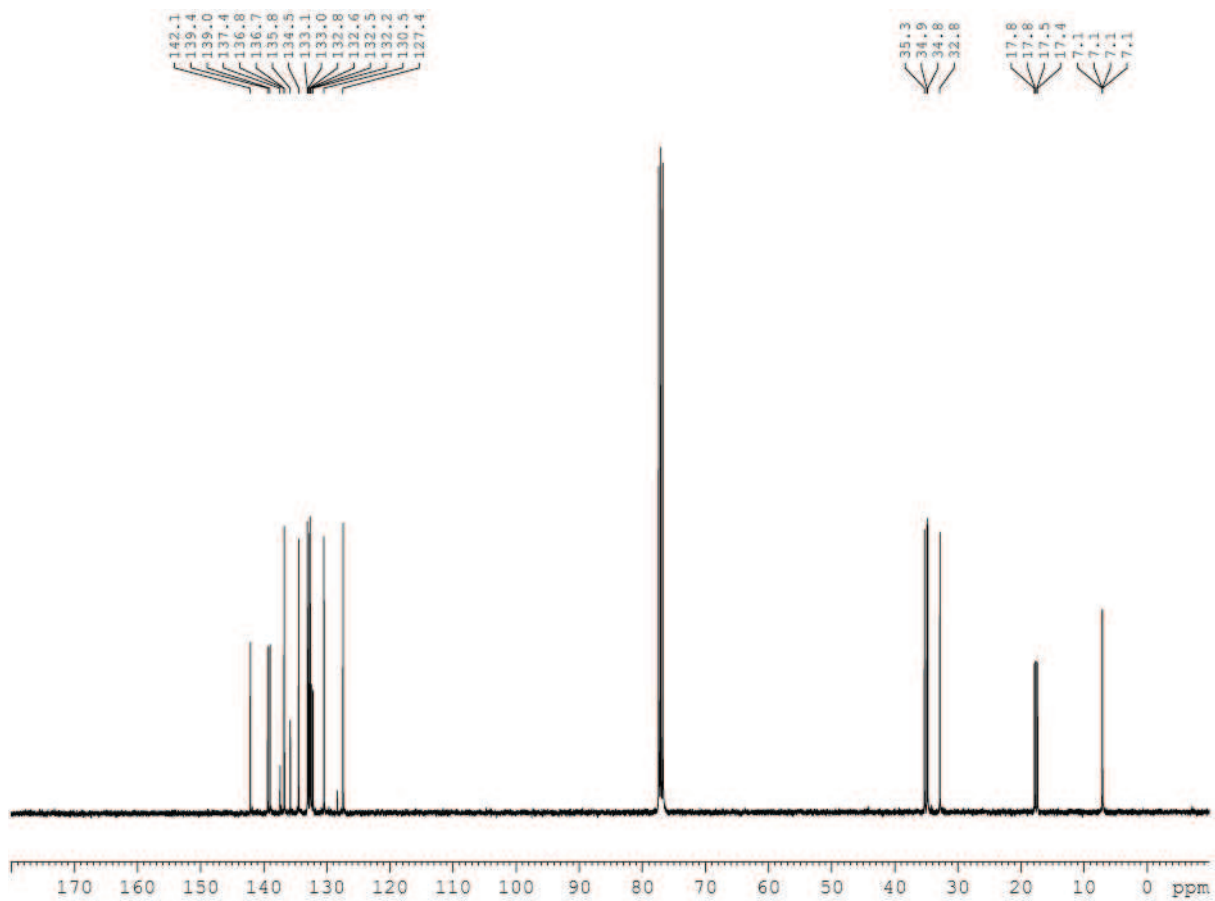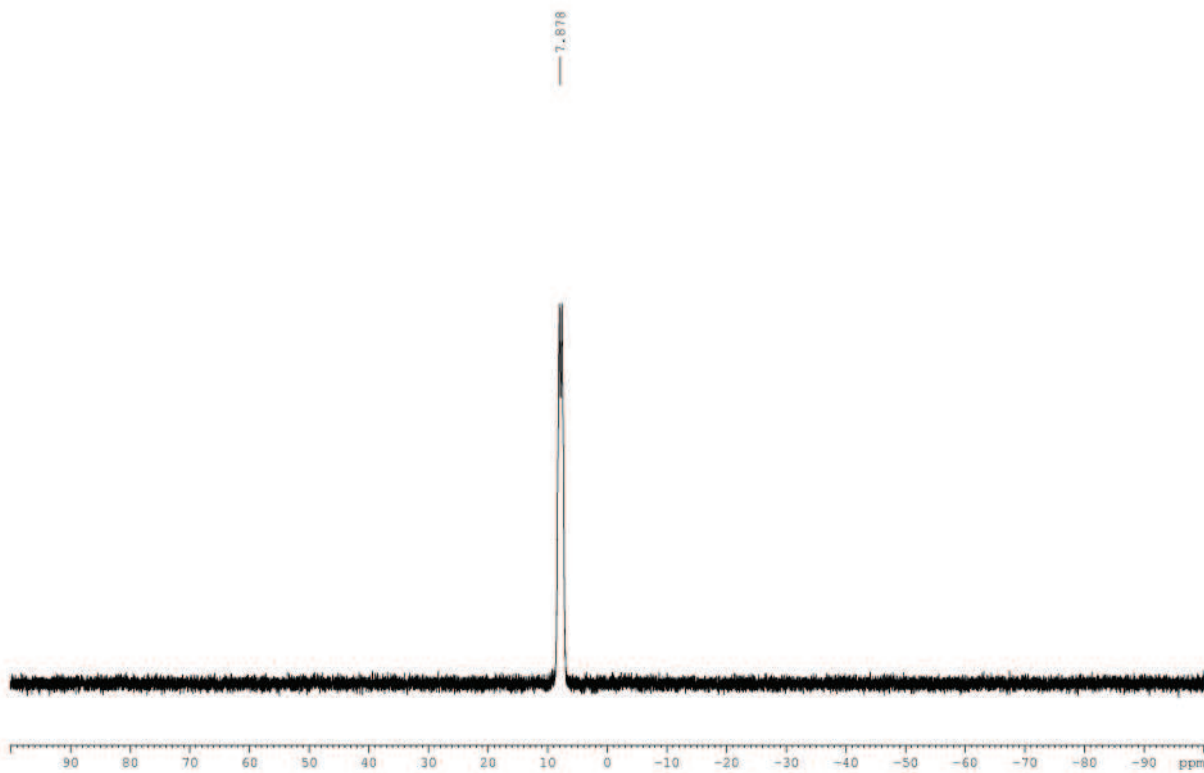



**(R)-1-Benzyl-4-(methyl-*tert*-butylphosphino-borane)-1*H*-1,2,3-triazole (9)**

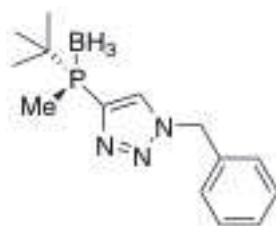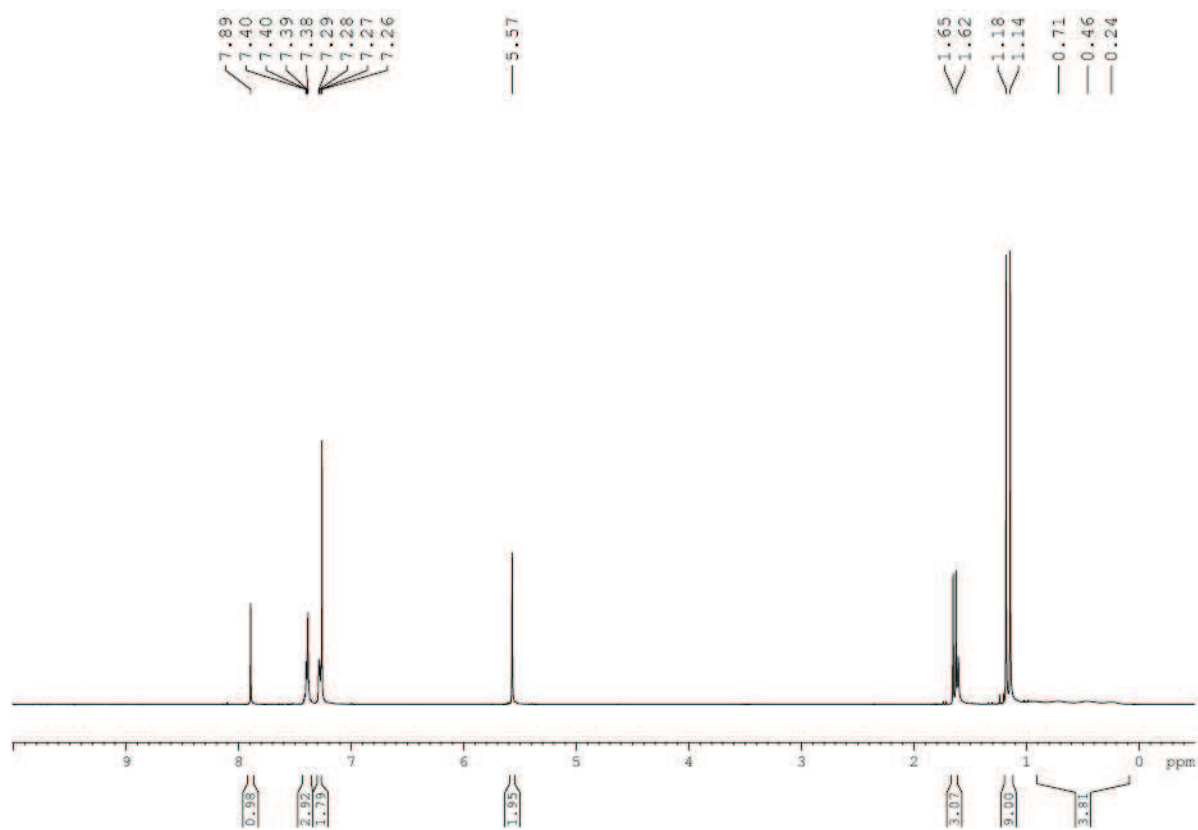

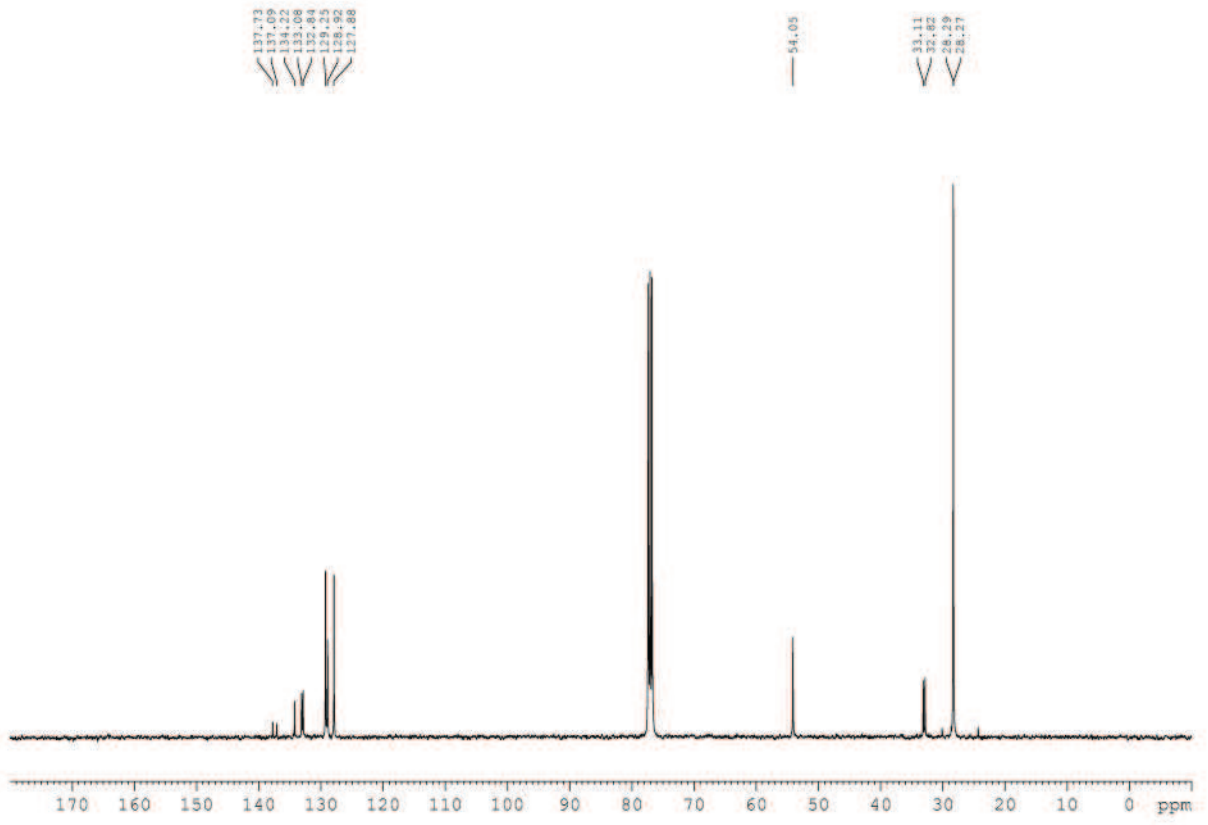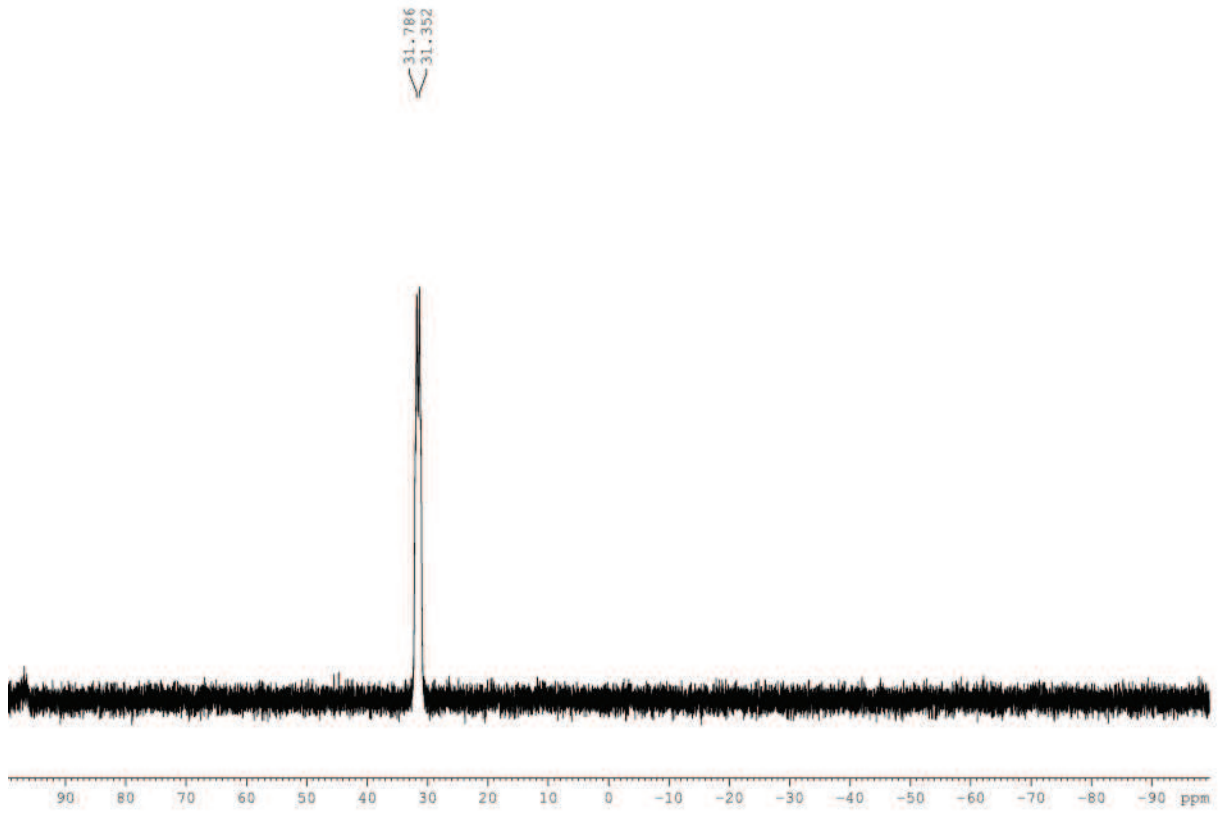

Dichlorobis[1-benzyl-4-(di-*tert*-butylphosphino)-1*H*-1,2,3-triazole]palladium(II) (10)

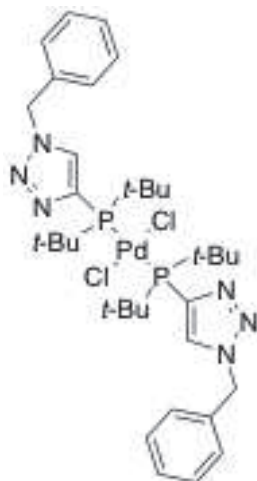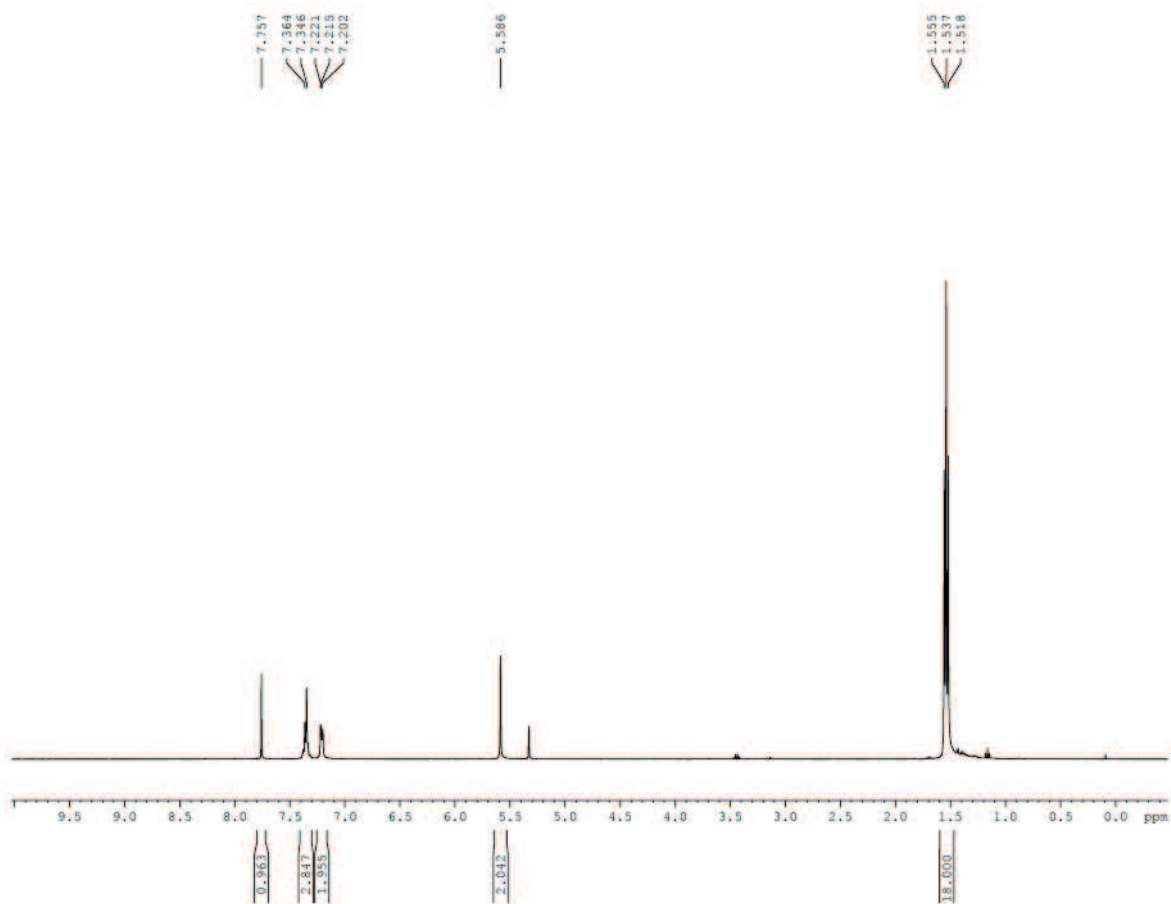

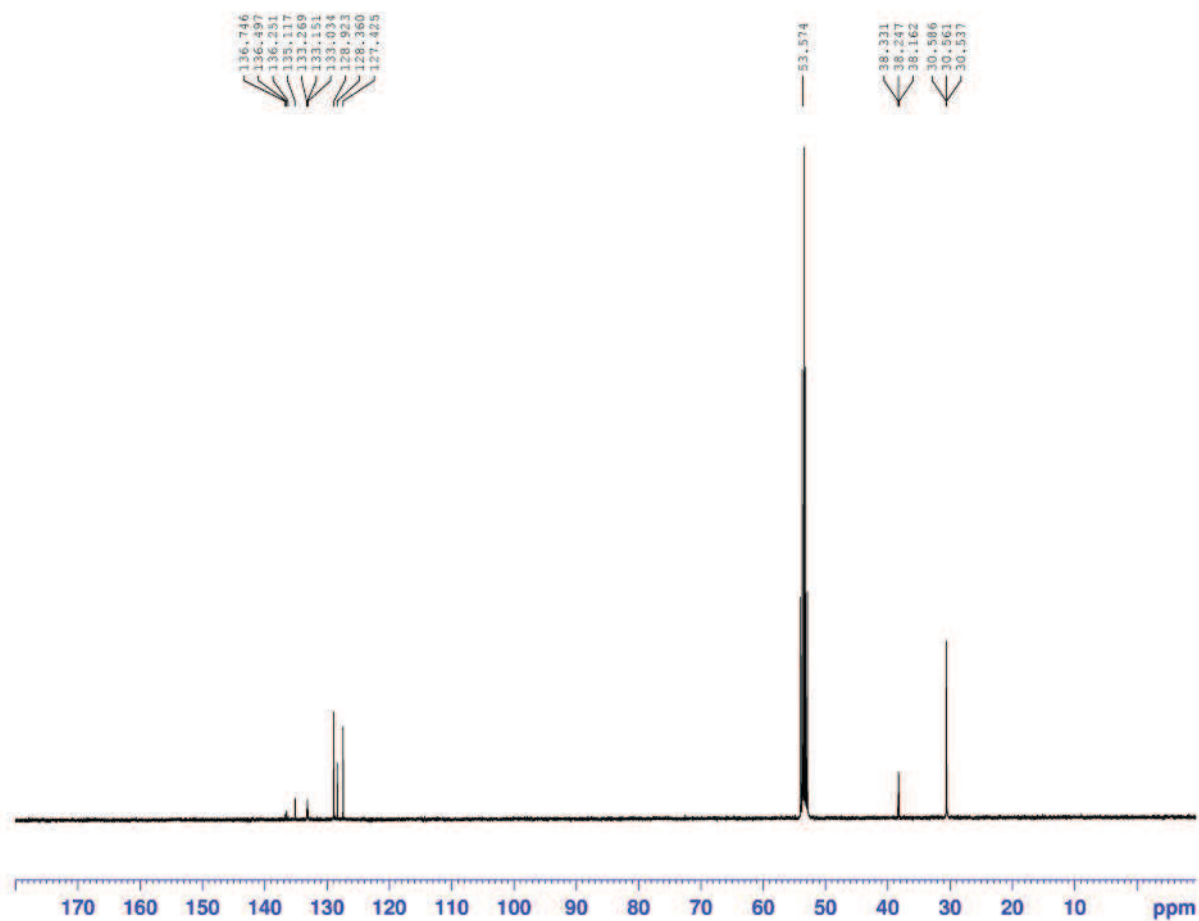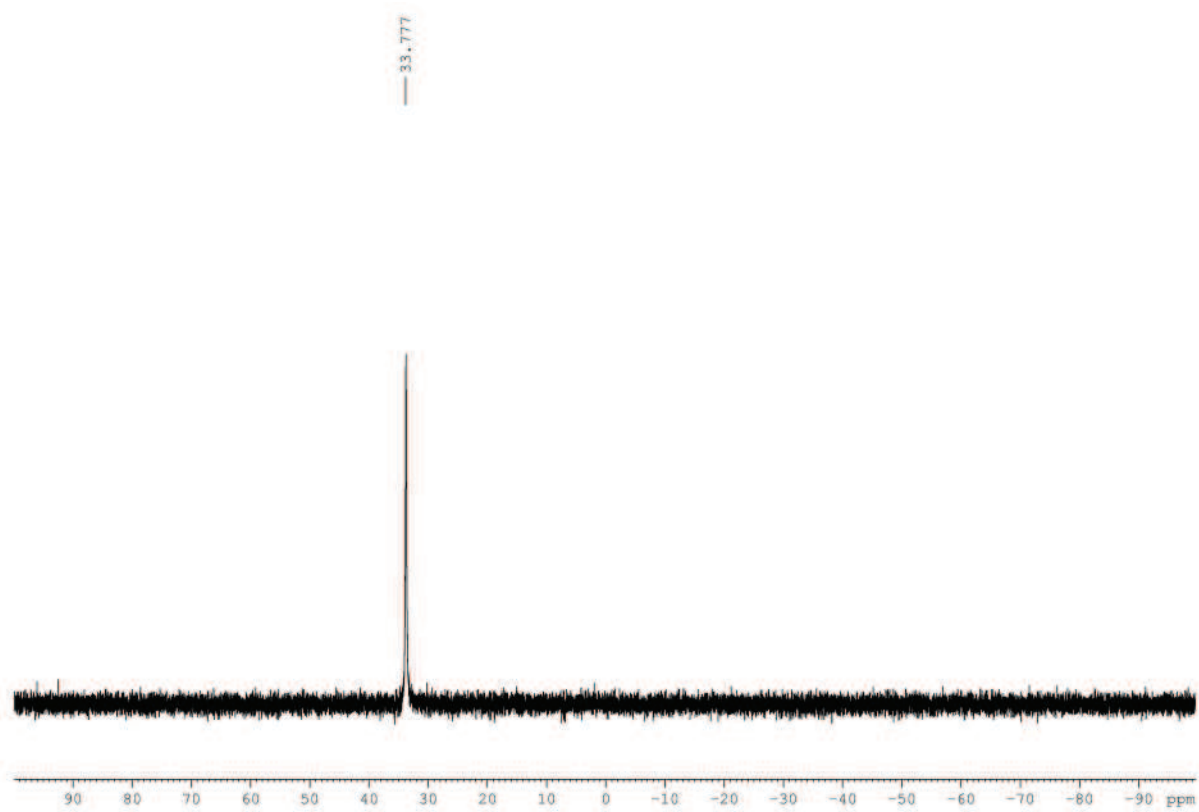

# 1-Benzyl-4-(diethylphosphino)-1H-1,2,3-triazole (1a)

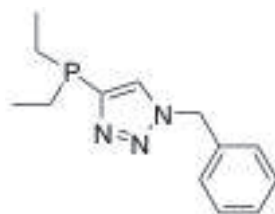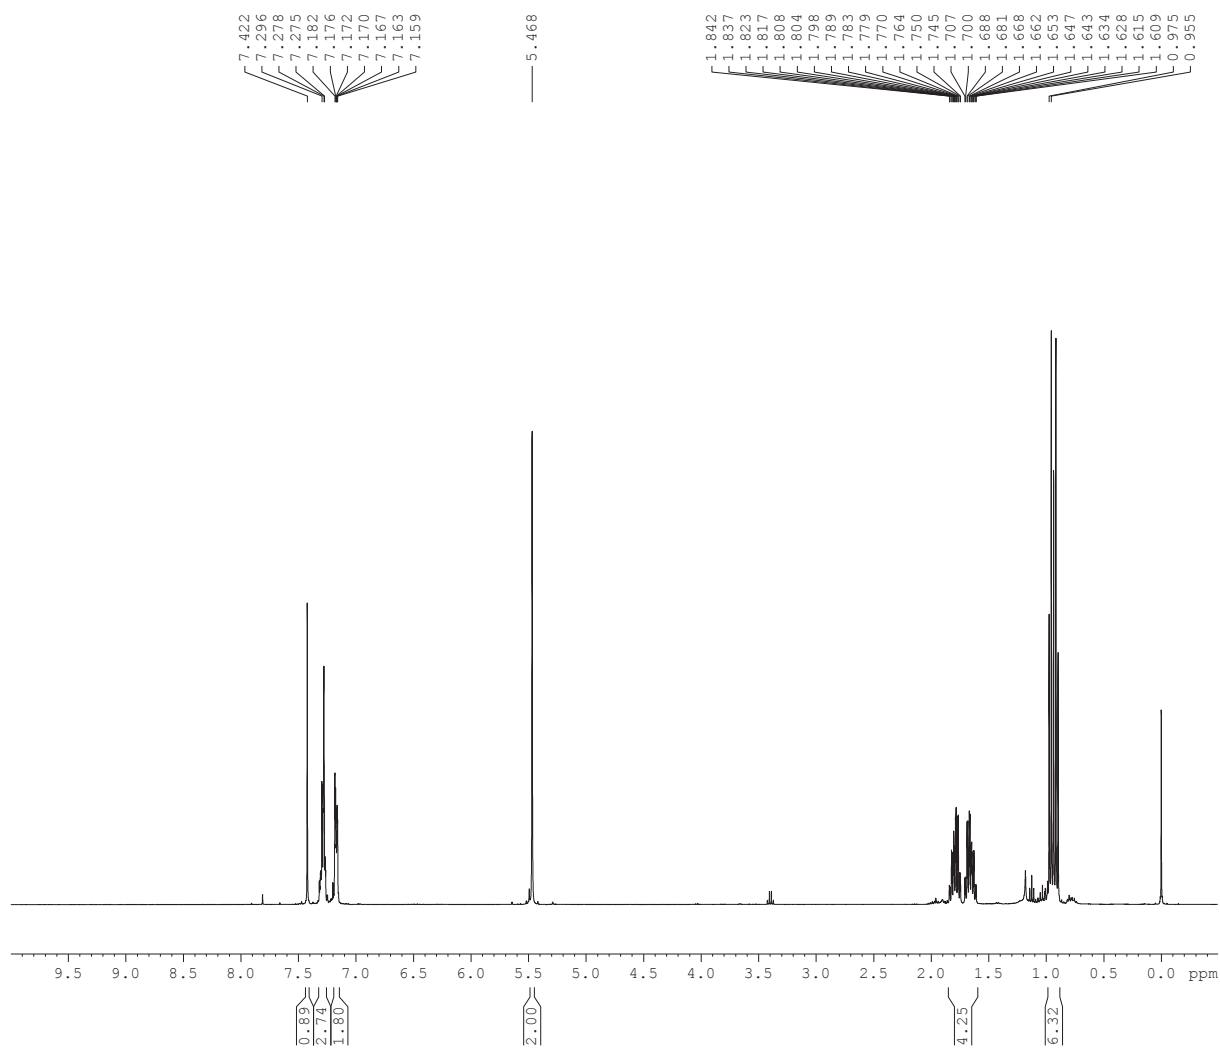

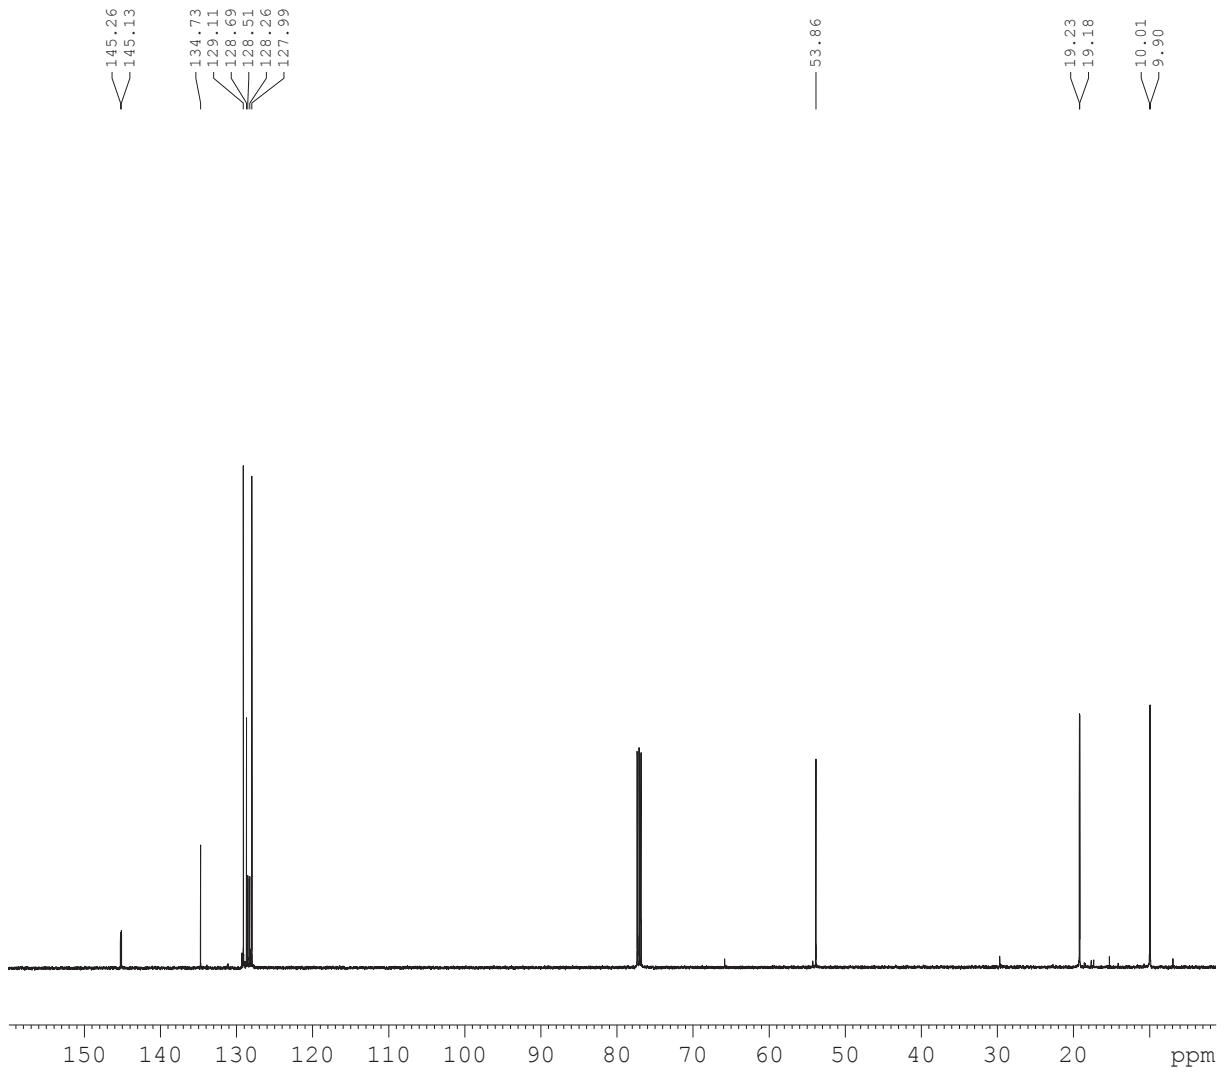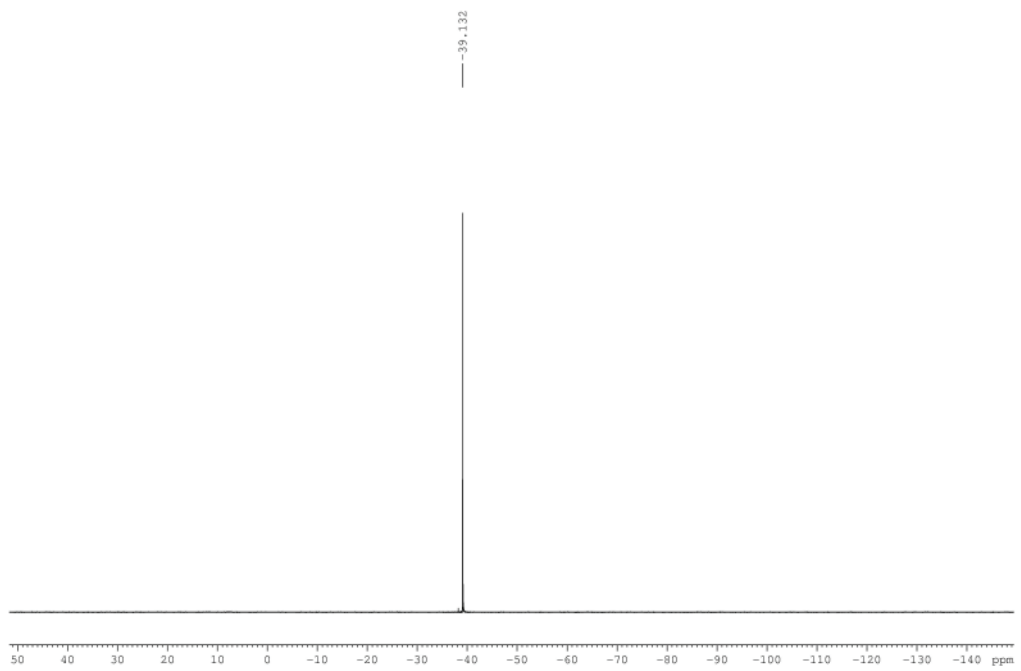

# 1-(4-Anisyl)-4-(diethylphosphino)-1H-1,2,3-triazole (1c)

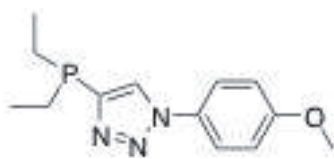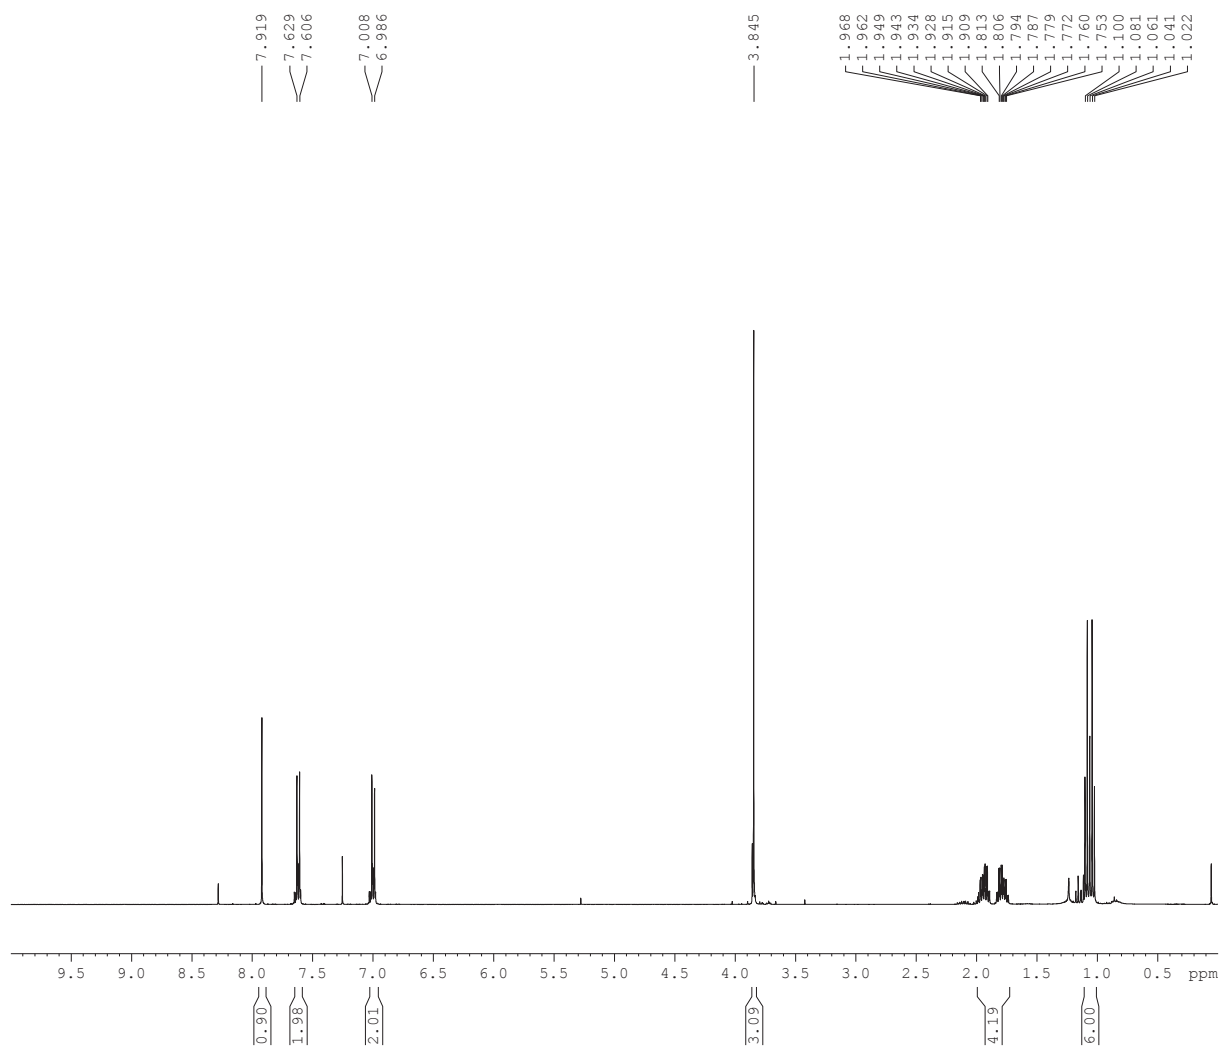

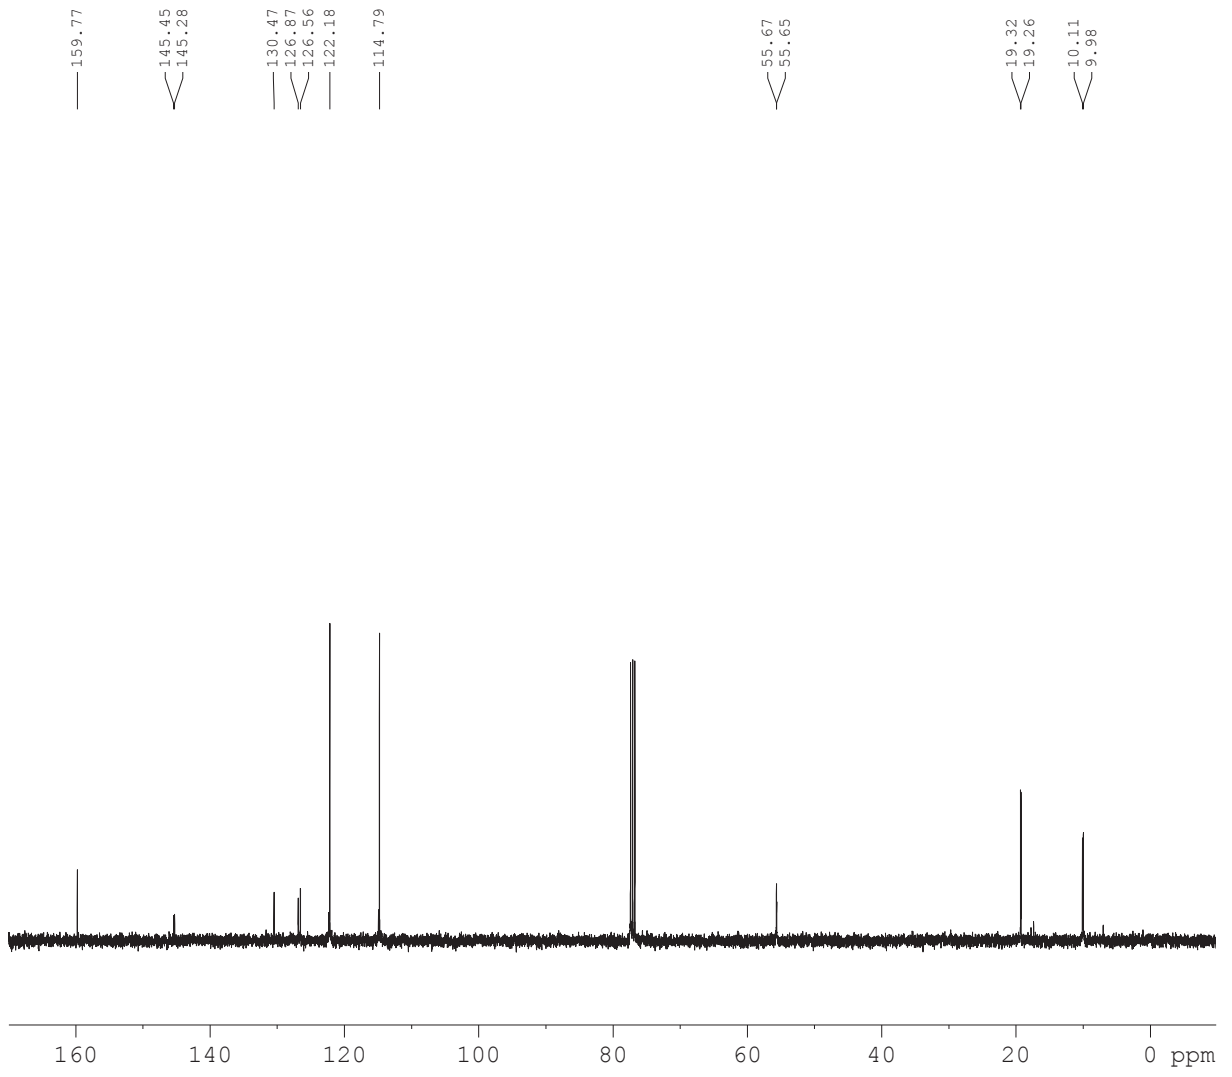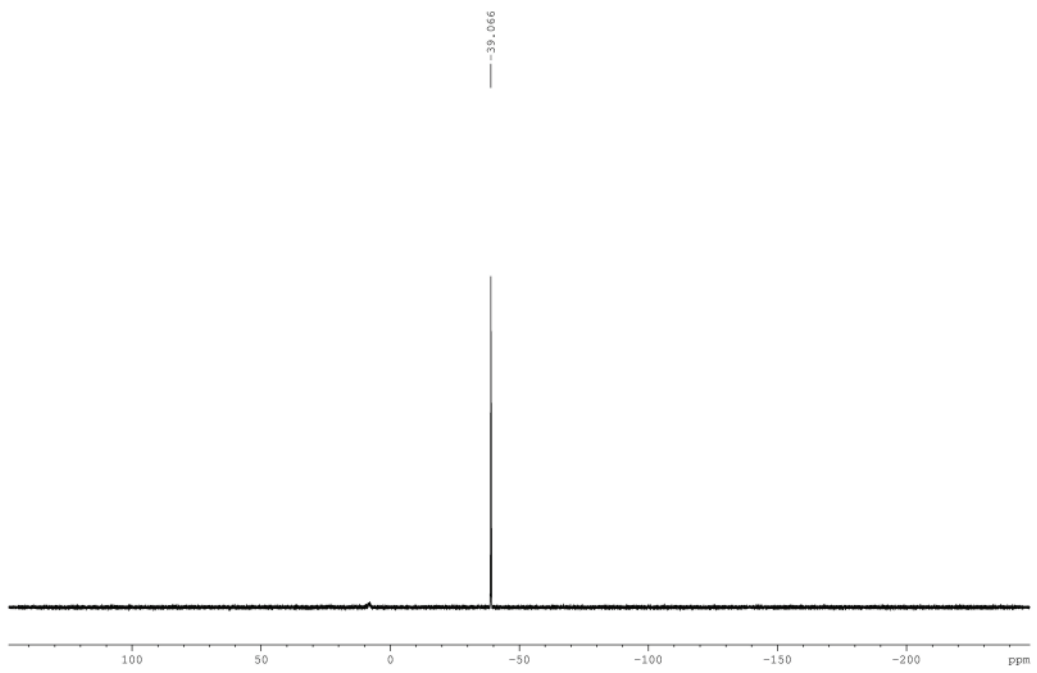



# 4-(Diethylphosphino)-1-(4-trifluoromethylphenyl)-1*H*-1,2,3-triazole (1e)

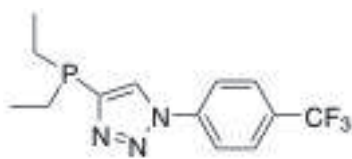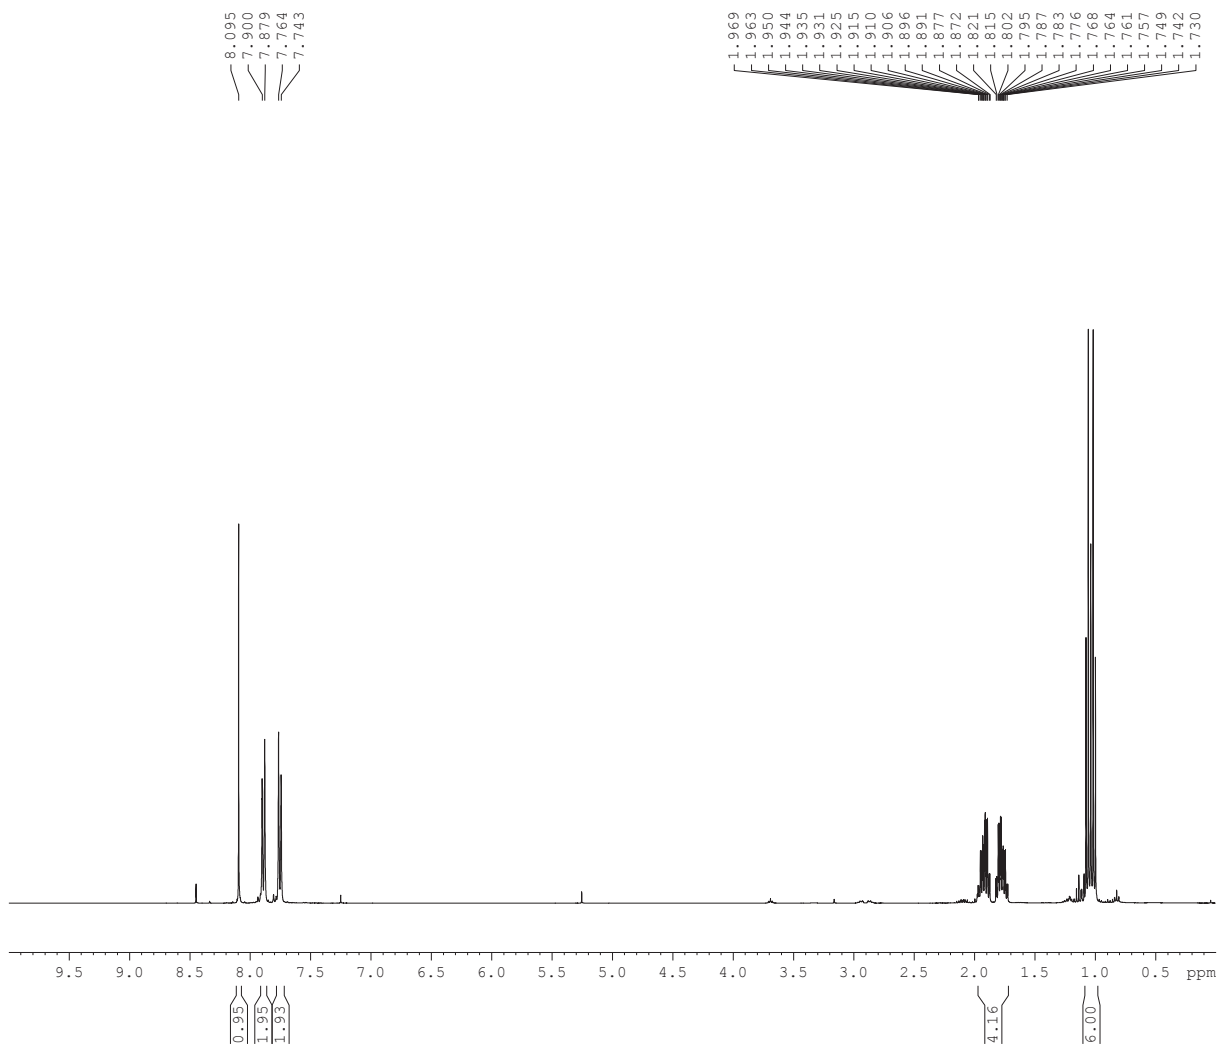

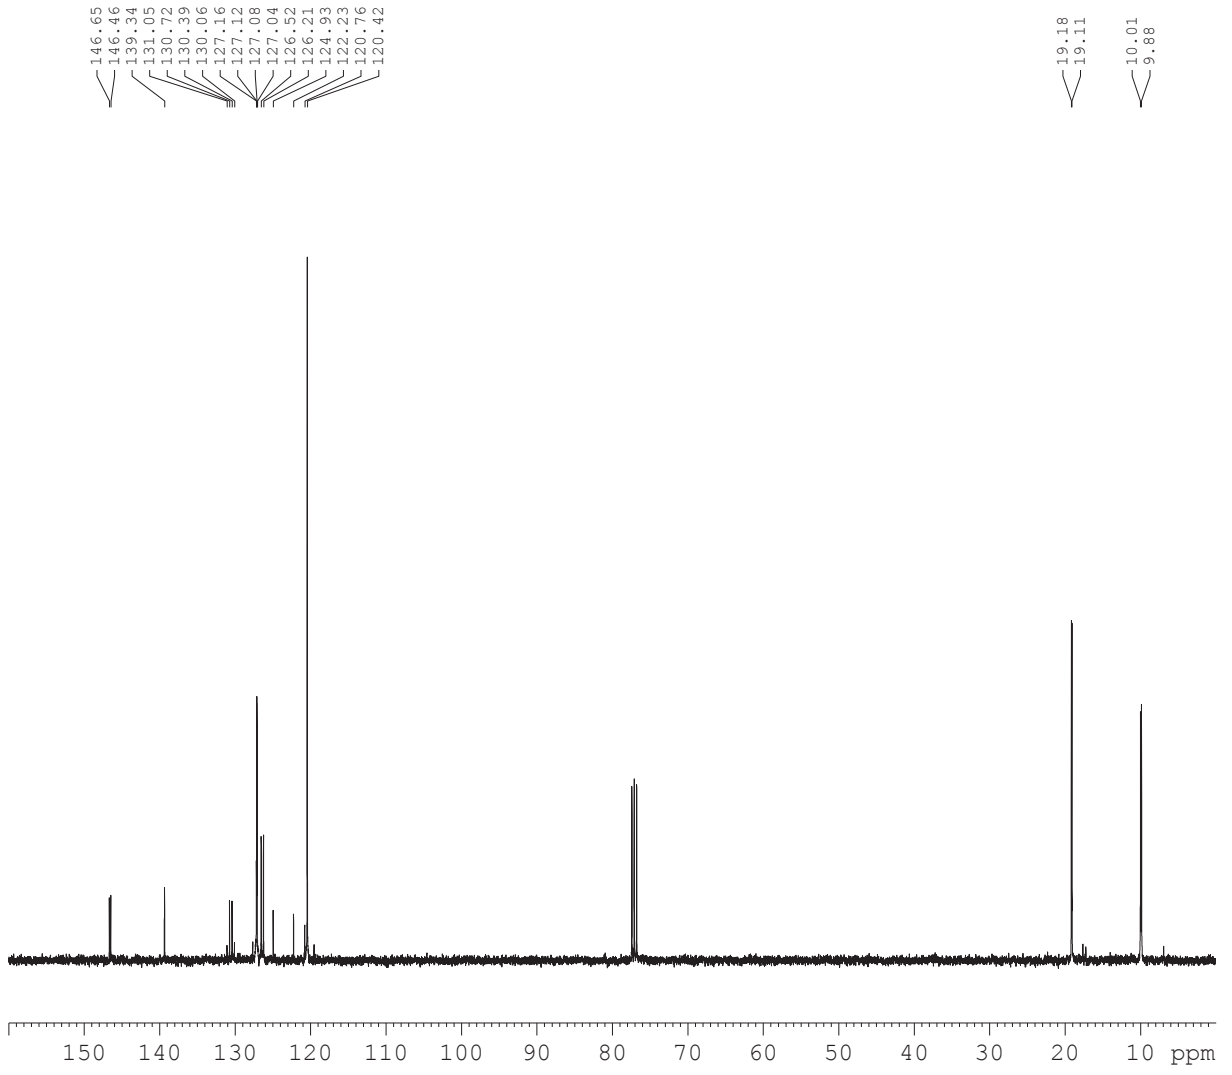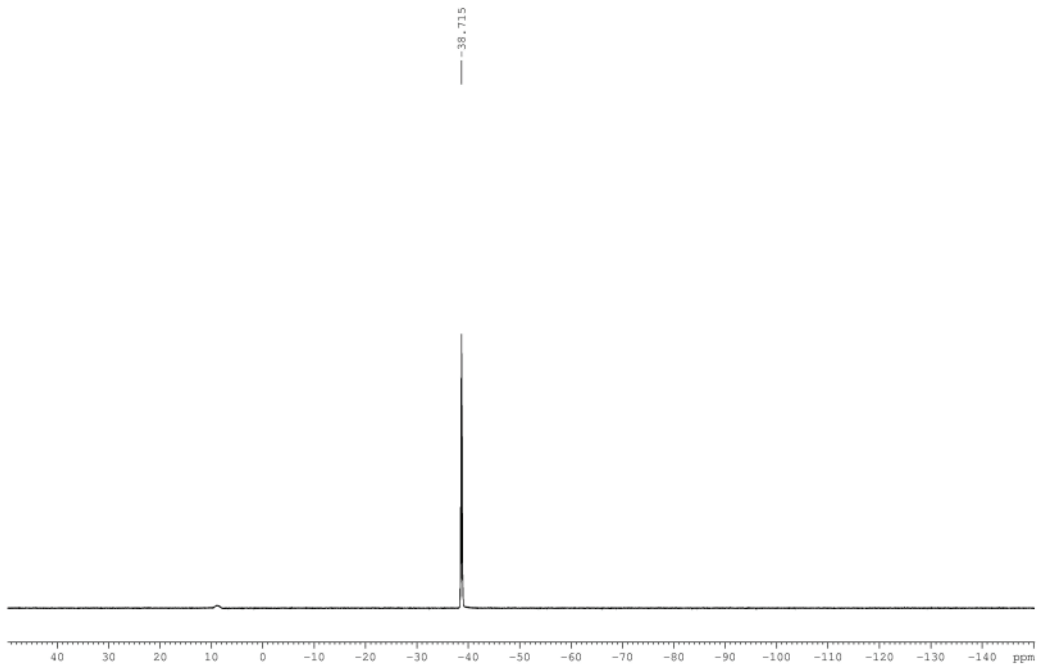

1-Benzyl-4-(phenylmethylphosphino)-1*H*-1,2,3-triazole (1g)

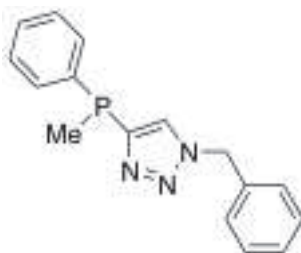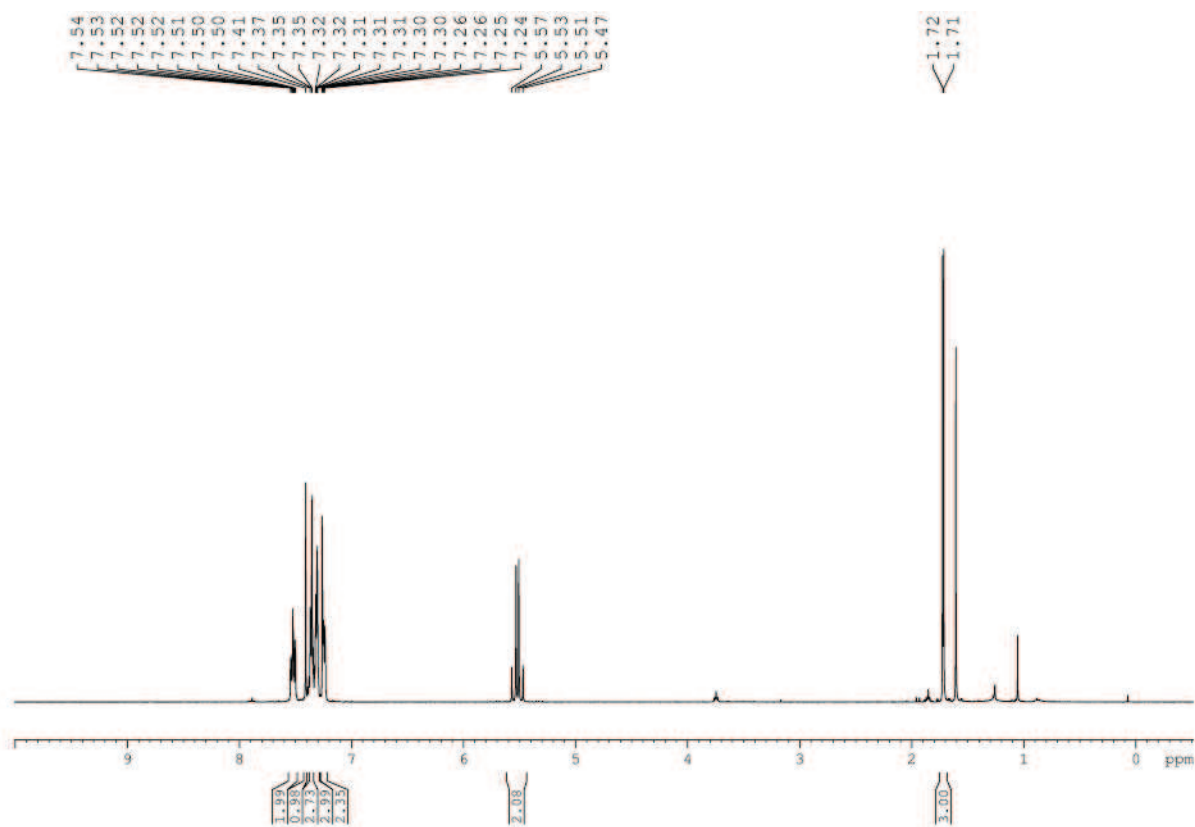

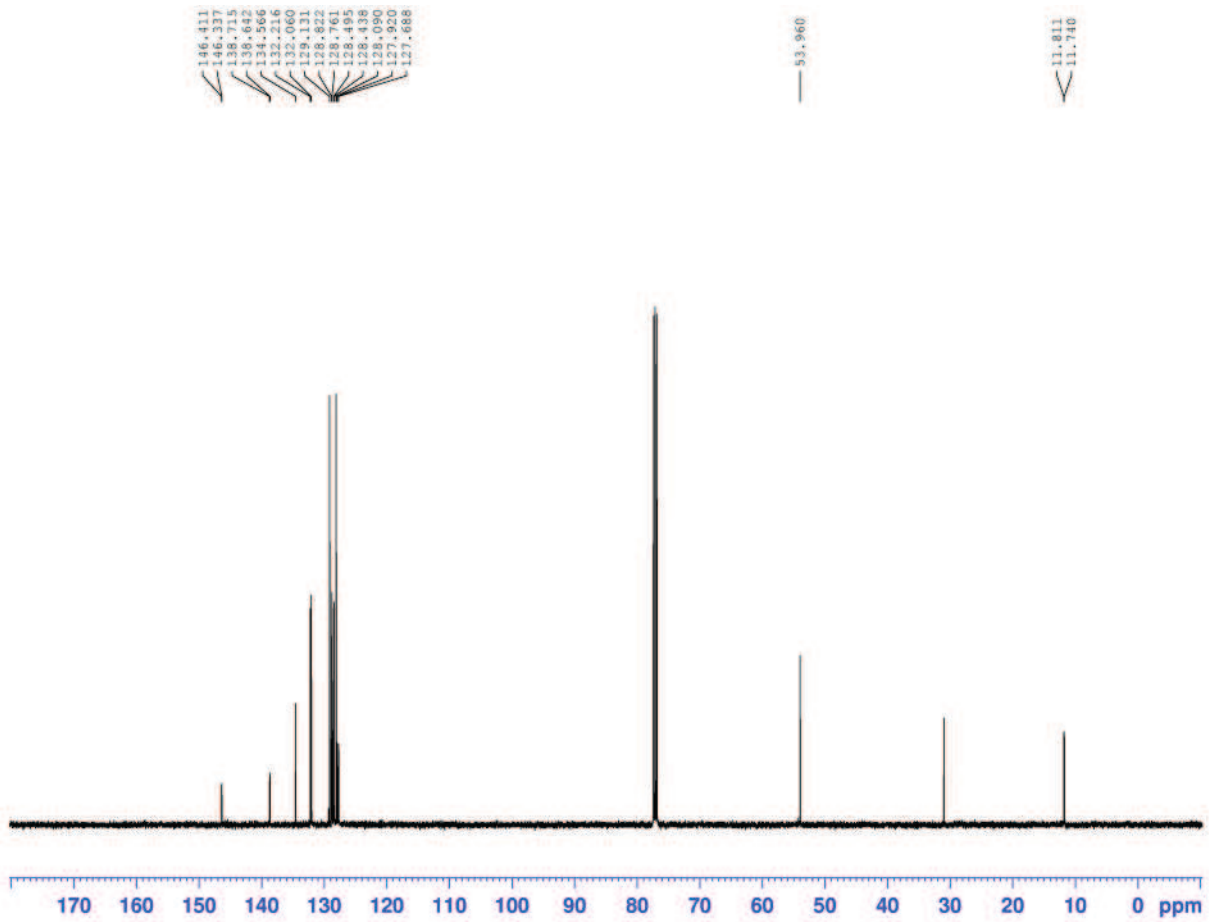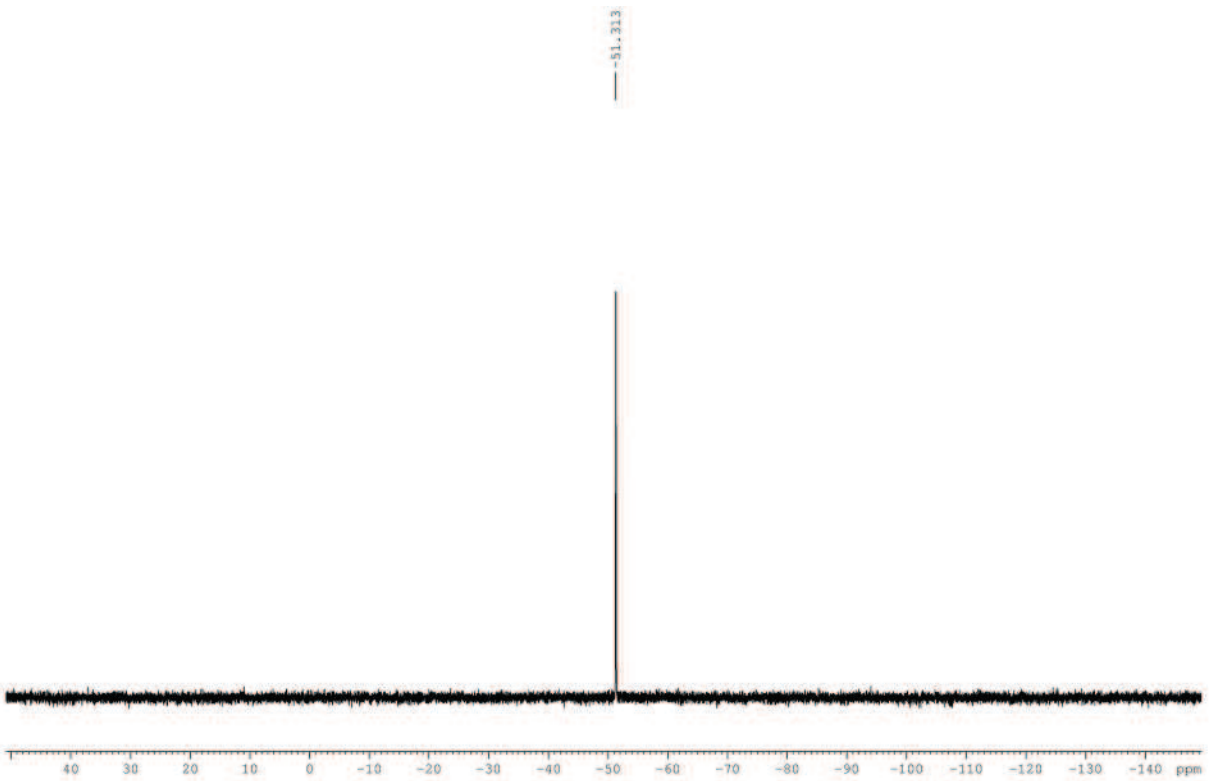

# 1-Benzyl-4-(diphenylphosphino)-1H-1,2,3-triazole (1i)

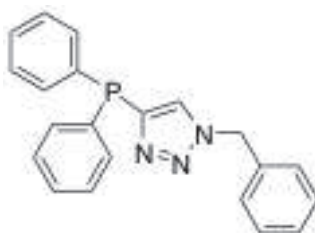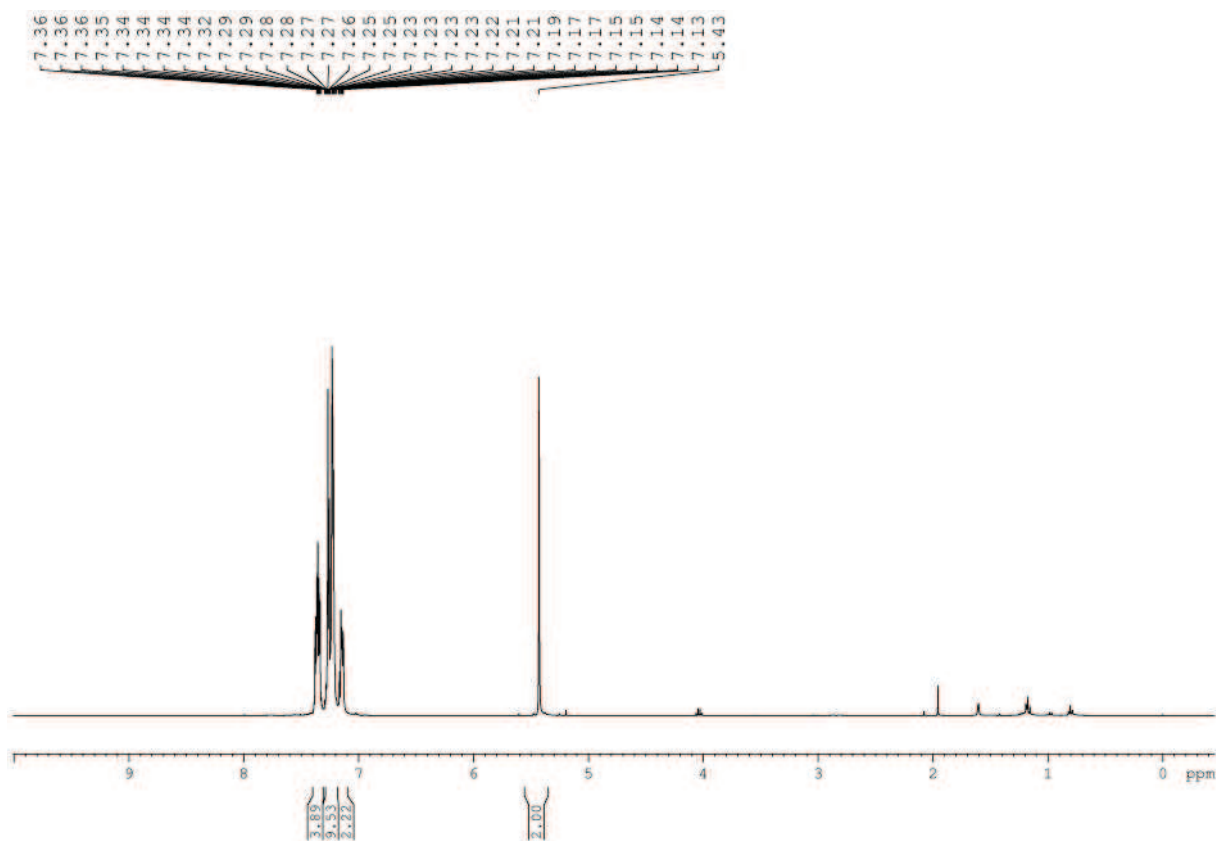

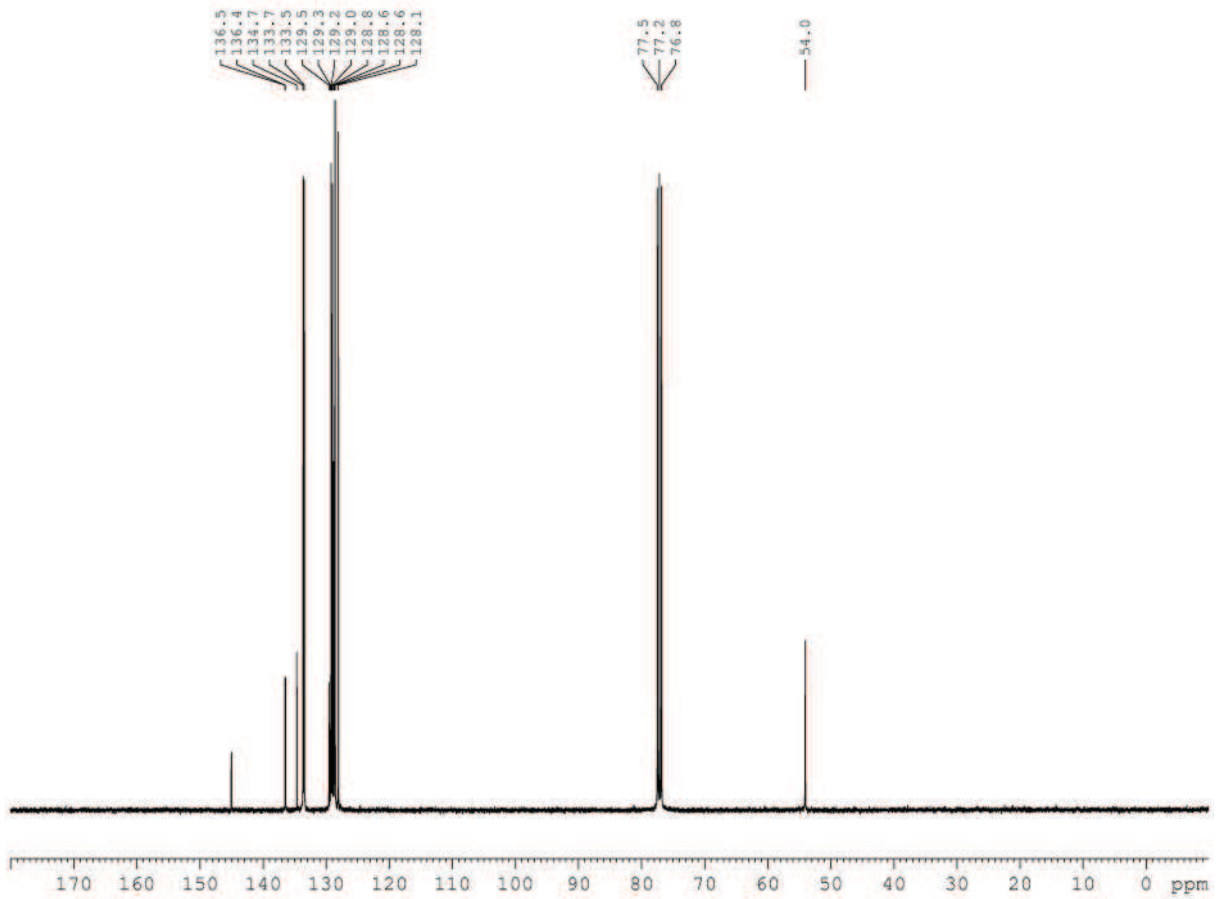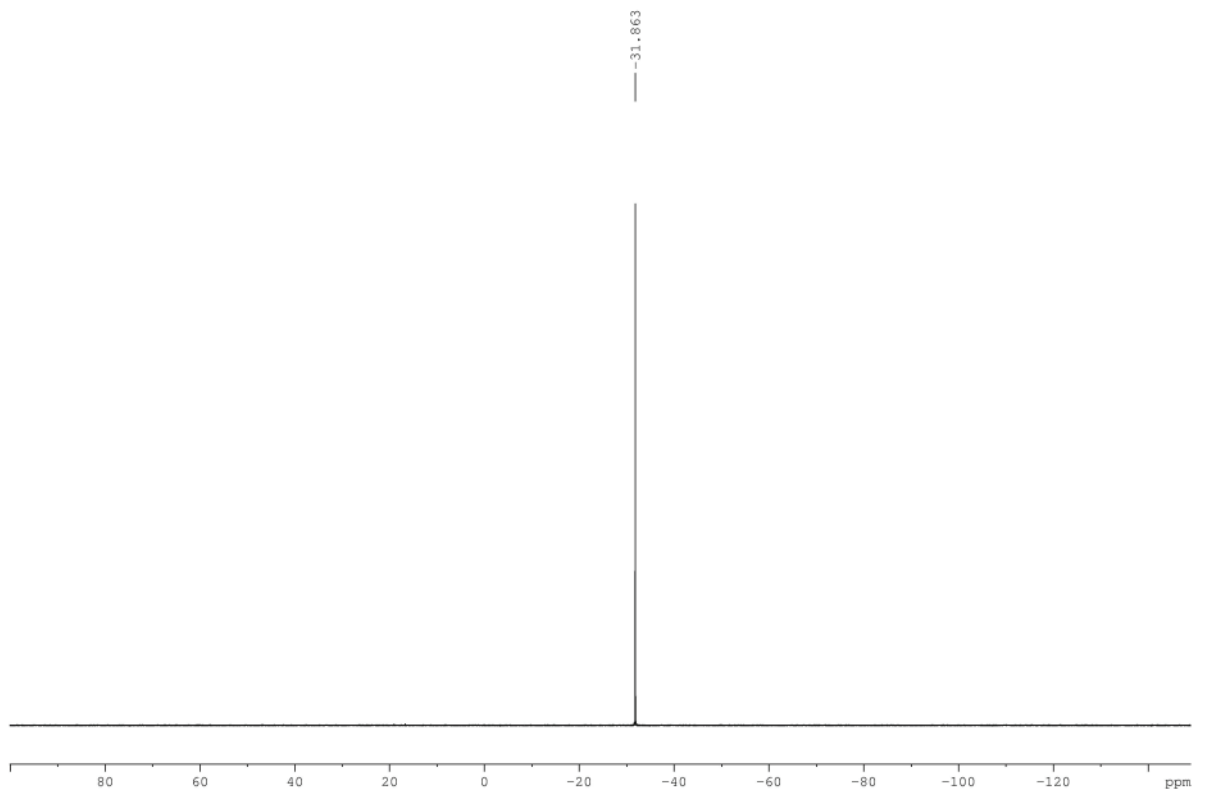

1-(4-Bromophenyl)-4-(diphenylphosphino)-1*H*-1,2,3-triazole (1j)

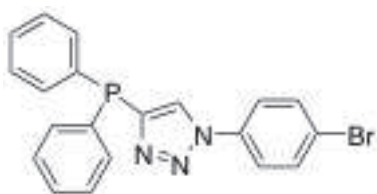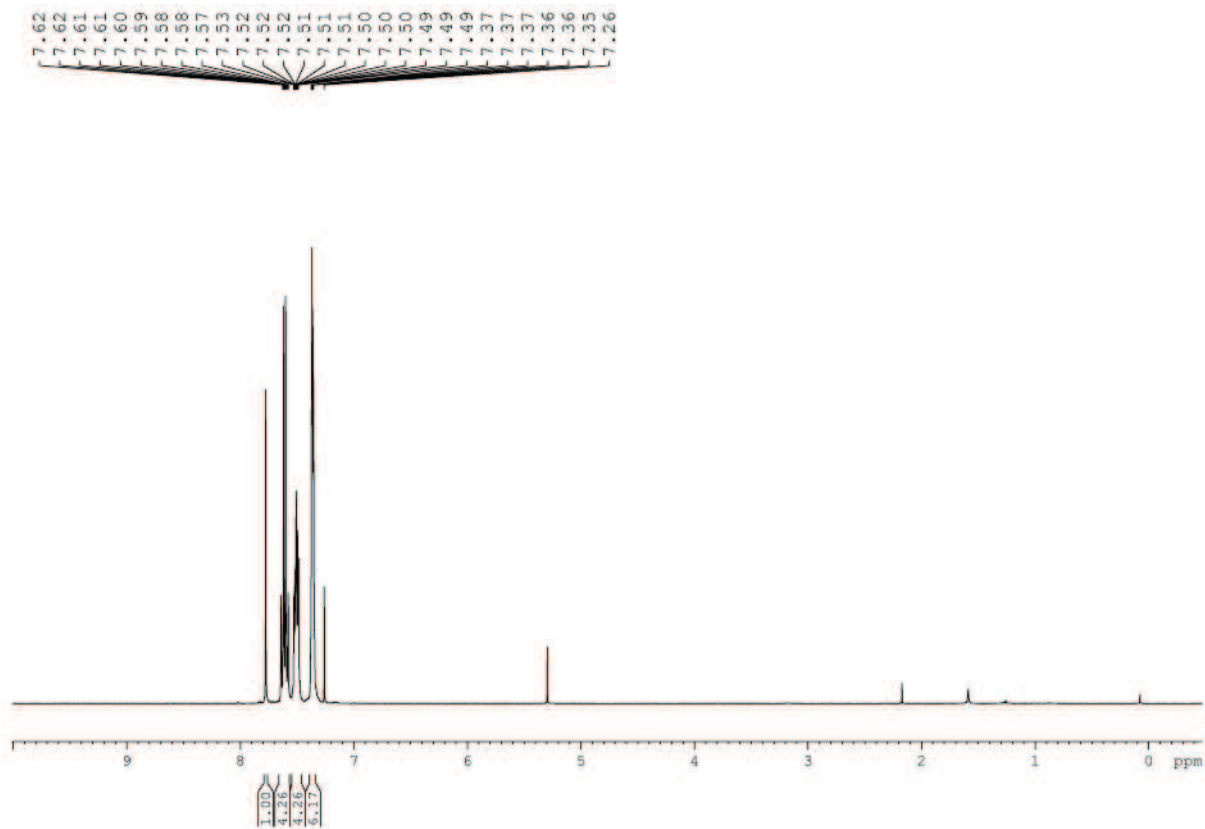

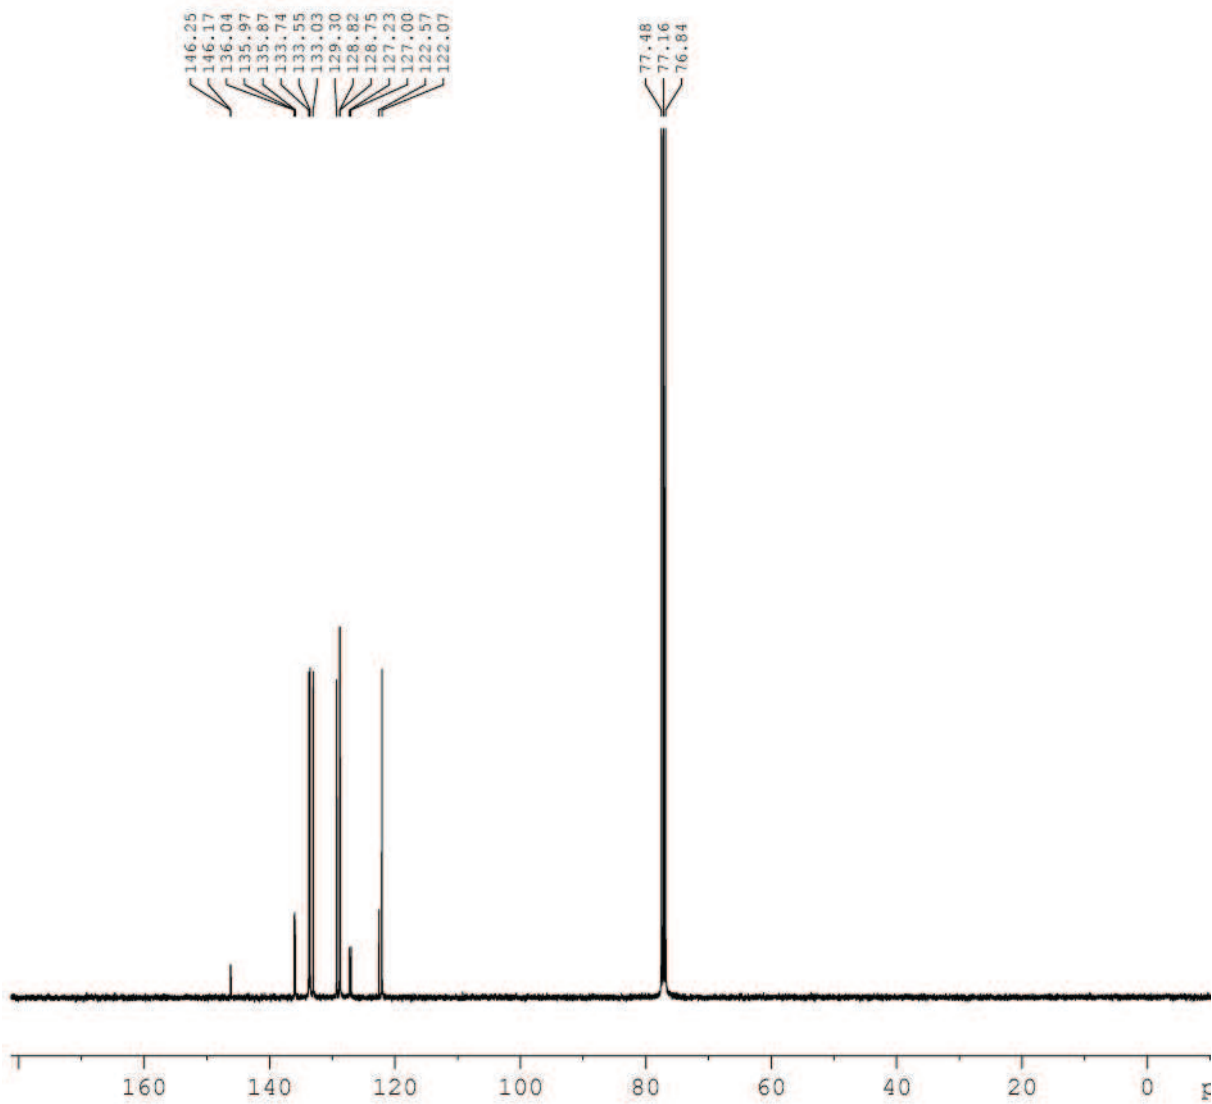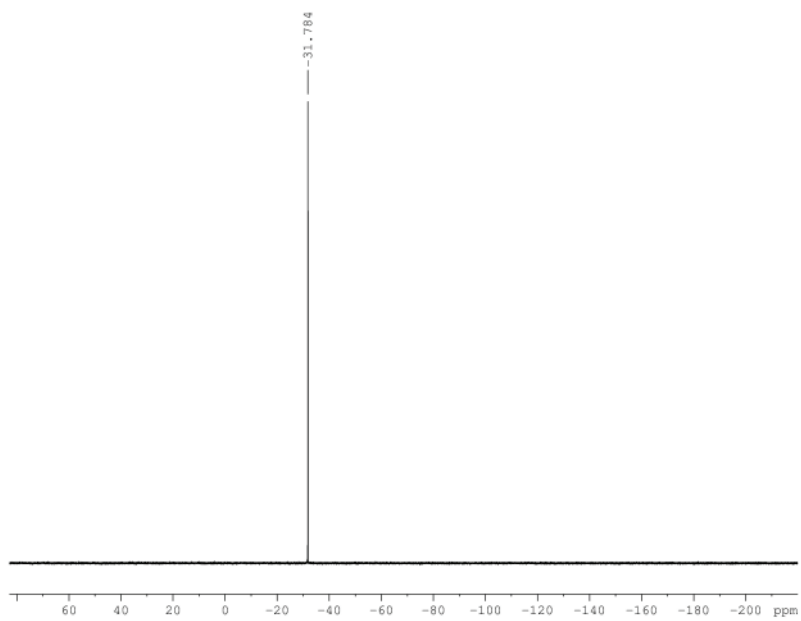



1-(4-Trifluoromethylphenyl)-4-(diphenylphosphino)-1*H*-1,2,3-triazole (1k)

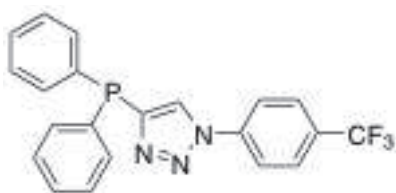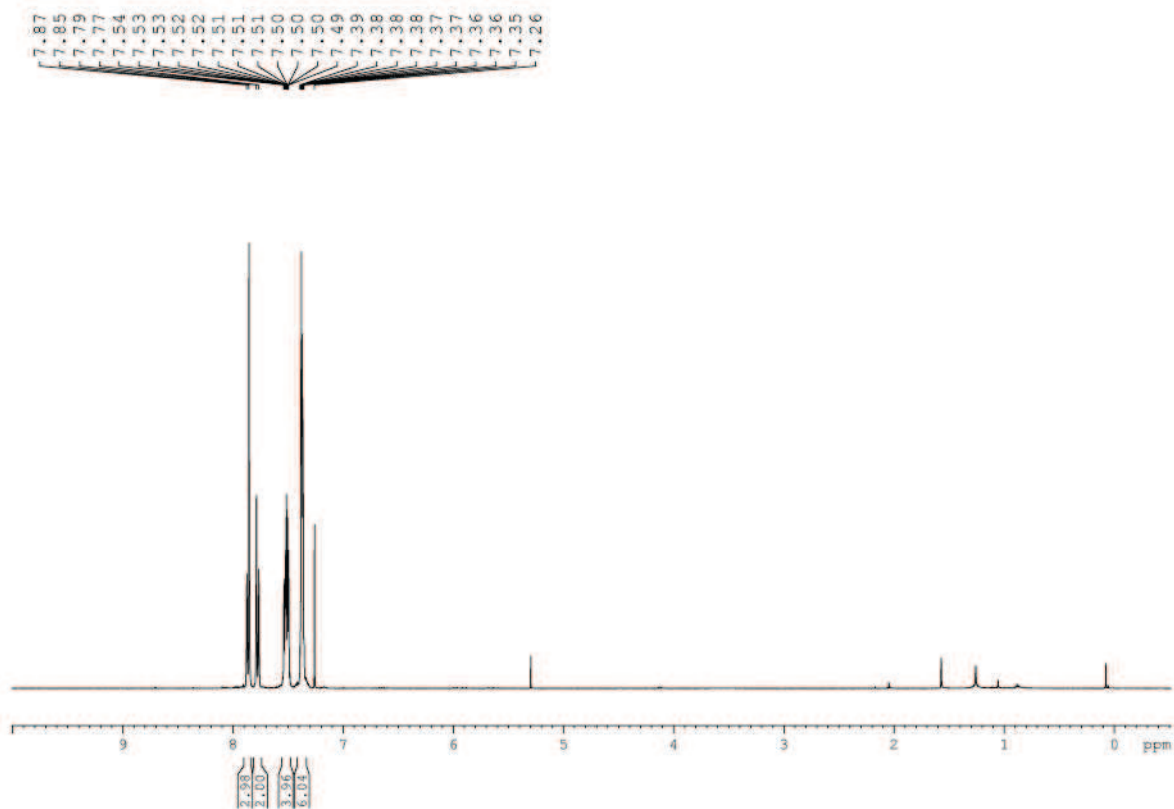

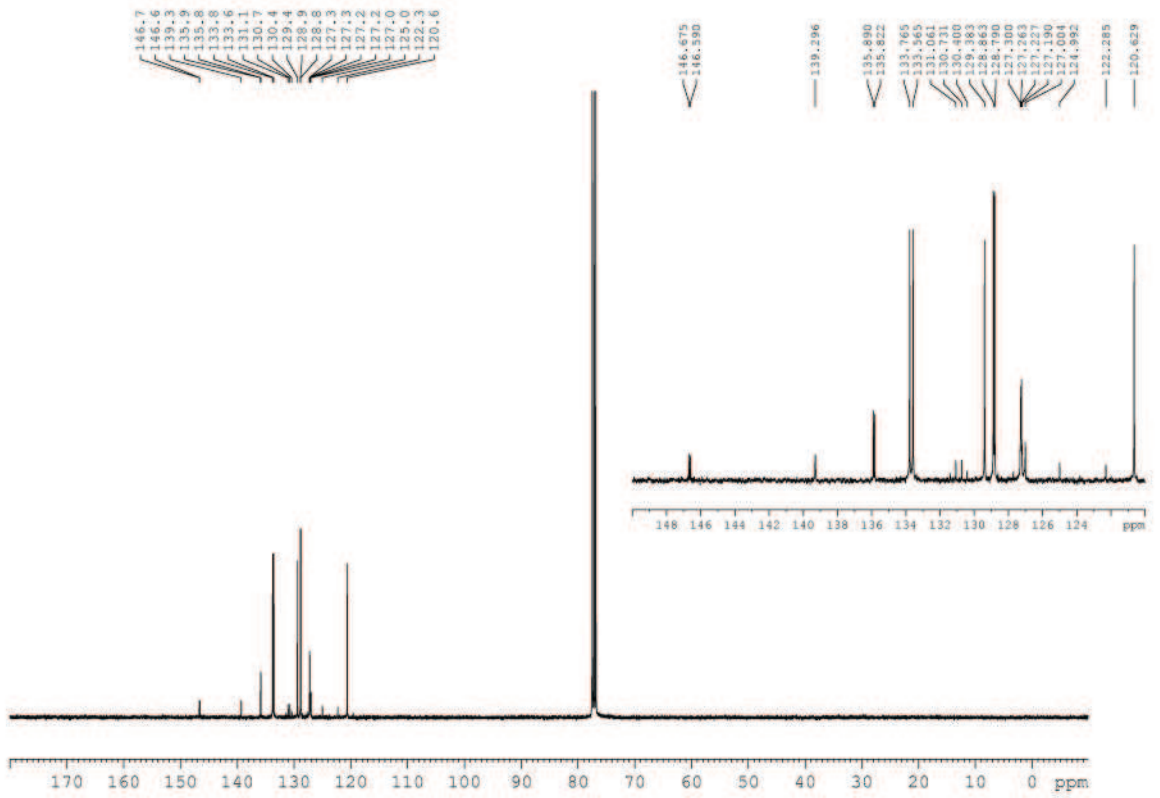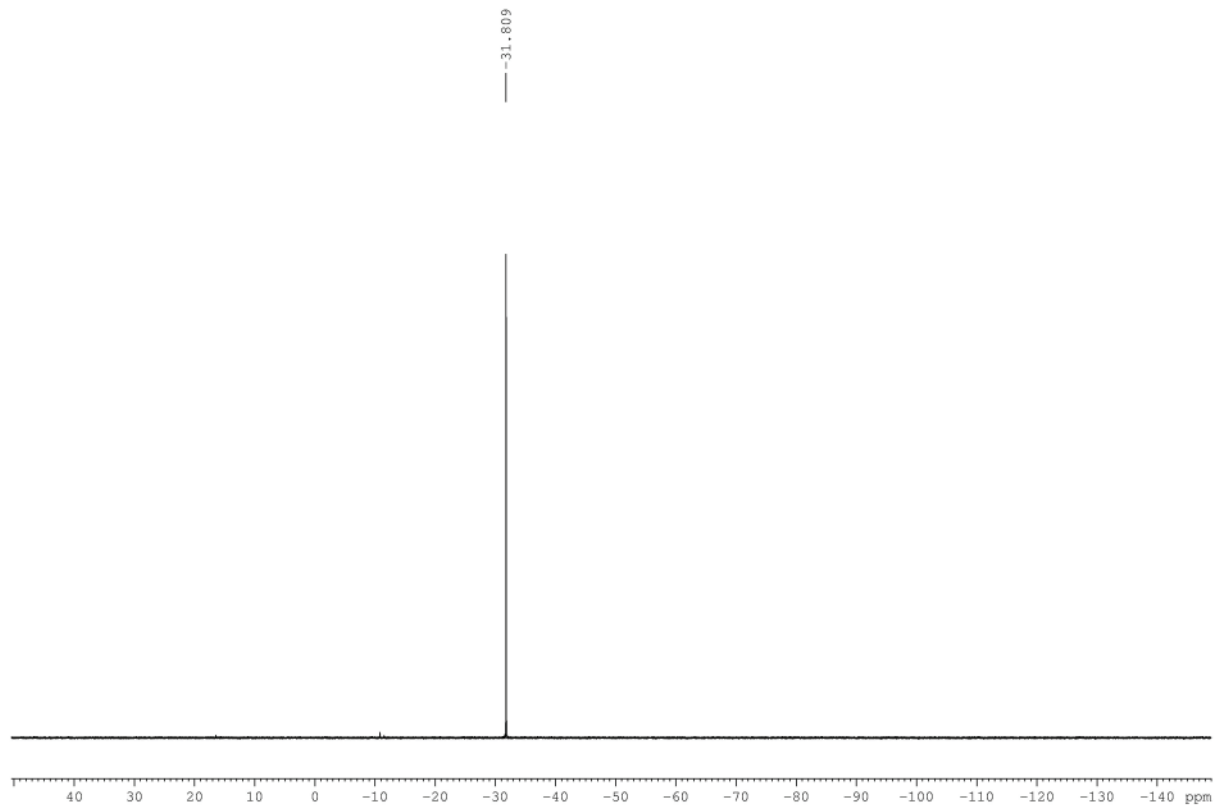

#### 4. Chiral HPLC Analysis of 9

**RV421**

**Instrument Method: IC 1mL90%nhp10%prop\_20dC**

Stored: 1/9/2013 3:15:56 PM

Method Information

Comments Col. Daicel Chiralpak IC 4,6mmx250mm 5µm 1mL/mn 90%n-heptane10%propanol-2 éch.+col.à 20°C  
 Modified User System  
 Locked No  
 Method Id 1067  
 Method Version 1  
 Edit User

Revision History

This method contains 3 items in the revision history.

Spectrum Index Plot

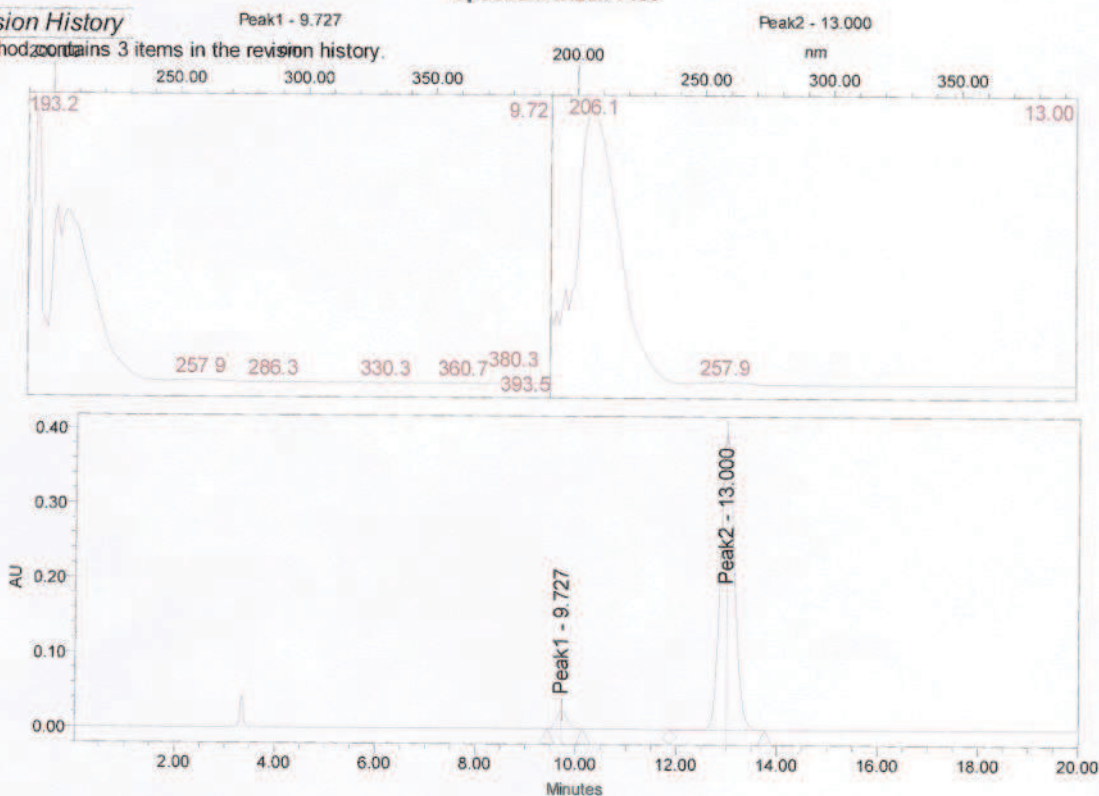

**Peak Results**

| Name    | Retention Time (min) | Area (µV*sec) | % Area |
|---------|----------------------|---------------|--------|
| 1 Peak1 | 9.727                | 380315        | 4.66   |
| 2 Peak2 | 13.000               | 7778683       | 95.34  |

Processed Channel Descr. PDA 210.0 nm

**RV421-2**

**Instrument Method: IC 1mL90%nhep10%prop\_20dC**

Stored: 1/9/2013 3:15:56 PM

Method Information

Comments Col. Daicel Chiralpak IC 4,6mmx250mm 5µm 1mL/mn 90%n-heptane10%propanol-2 éch.+col.à 20°C  
 Modified User System  
 Locked No  
 Method Id 1067  
 Method Version 1  
 Edit User

Revision History

This method contains 3 items in the revision history.

Spectrum Index Plot

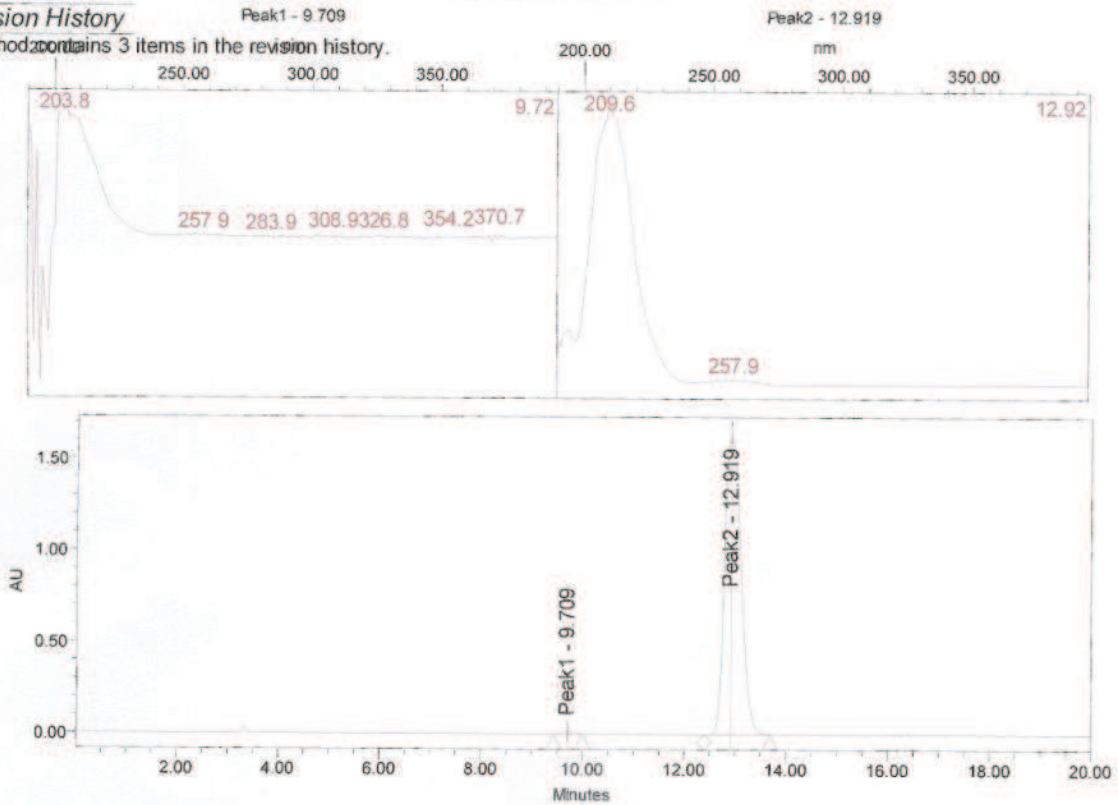

**Peak Results**

| Name    | Retention Time (min) | Area (µV*sec) | % Area |
|---------|----------------------|---------------|--------|
| 1 Peak1 | 9.709                | 234799        | 0.63   |
| 2 Peak2 | 12.919               | 37252329      | 99.37  |

Processed Channel Descr. PDA 210.0 nm
